# Supplementary material for: Formal [4+1] cyclization of (thio/imido)hydrazides and ethyl 3,3,3-trifluoropropanoate: unified synthesis of 1,3,4-oxadiazoles, 1,3,4-thiadiazoles and 1,2,4-triazoles
Source: Royal Society of Chemistry journal article supplement (doi:10.1039/d2nj04147b), 2022-01-01
Supplement: d2nj04147b1.pdf [file d2nj04147b1.pdf]

## Supporting Information

### Formal [4+1] Cyclization of (Thio/Imido)Hydrazides and Ethyl 3,3,3-Trifluoropropanoate: Unified Synthesis of 1,3,4-Oxadiazoles, 1,3,4-Thiadiazoles and 1,2,4-Triazoles

Lan Zhao,<sup>a,b</sup> Jun Xu,<sup>c</sup> Jun Ma,<sup>a,b</sup> Guangwei Yin,<sup>a,b</sup> Fangyi Li,<sup>\*a,b</sup> Tongchuan Suo,<sup>\*a,b</sup> and Chunhua Wang <sup>\*d</sup>

<sup>a</sup>College of Pharmaceutical Engineering of Traditional Chinese Medicine, State Key Laboratory of Component-Based Chinese Medicine, Tianjin University of Traditional Chinese Medicine, Tianjin 301617, P. R. China

<sup>b</sup>Haihe Laboratory of Modern Chinese Medicine, Tianjin 301617, P. R. China

<sup>c</sup>School of Pharmaceutical Science & Technology, Tianjin University, Tianjin 300072, P. R. China

<sup>d</sup>School of Medicine, Foshan University, Foshan 528225, P. R. China

*E-mail: lifangyi@tjutcm.edu.cn, suotc@tjutcm.edu.cn, pharmwch@126.com*

#### List of Contents

|                                         |     |
|-----------------------------------------|-----|
| 1. General Information                  | S2  |
| 2. Experimental Procedure               | S2  |
| 3. NMR Spectra                          | S18 |
| 4. X-ray structure of 2a (CCDC 2170479) | S65 |
| 5. X-ray structure of 4d (CCDC 2178538) | S66 |
| 6. X-ray structure of 6f (CCDC 2178536) | S67 |

## 1. General Information

All the reactions were carried out using oven-dried glassware. All the substrates and solvents for the synthesis of compounds were purchased from commercial source (Aladdin, Alfa, Macklin) and used as received without any further purification. All the hydrazides,<sup>1</sup> thiohydrazides<sup>2</sup> and imidohydrazides<sup>3</sup> were synthesized using earlier reported methods. Thin layer chromatography was performed on plates (GF254) supplied by Yantai Chemicals (China) and visualization was accomplished using UV-light, iodine stains or potassium permanganate solution. Silica gel (200-300 mesh) supplied by Tsingdao Haiyang Chemicals (China) was used for column chromatography purification with a hexane–ethyl acetate mixture as eluent. All <sup>1</sup>H, <sup>13</sup>C and <sup>19</sup>F NMR spectra were recorded in CDCl<sub>3</sub> or DMSO-*d*<sub>6</sub> at RT on Bruker spectrometers (400 MHz, 500 MHz, 600 MHz). Chemical shifts were reported in parts per million (ppm), and the residual solvent peak was used as an internal reference: proton (CDCl<sub>3</sub>: δ 7.26, DMSO-*d*<sub>6</sub>: δ 2.50), carbon (CDCl<sub>3</sub>: δ 77.16, DMSO-*d*<sub>6</sub>: δ 39.52) or tetramethylsilane (TMS δ 0.00) was used as a reference. Multiplicity was indicated as follows: s (singlet), d (doublet), t (triplet), q (quartet), m (multiplet), dd (doublet of doublet), dtd (doublet of triplet of doublets), ddq (doublet of doublets of quartets), sext (sextet), brs (broad singlet). Coupling constants were reported in Hertz (Hz). High-resolution mass spectra (HRMS) were recorded by ESI-HRMS on a Q-TOF (time-of-flight) mass spectrometer.

## 2. Experimental Procedure

### (A) General Procedure for the Synthesis of 1,3,4-oxadiazoles.

To a 15 mL sealed tube was added 1 (0.50 mmol), Ethyl 3, 3, 3-trifluoropropionate (0.55 mmol), Na<sub>2</sub>CO<sub>3</sub> (0.75 mmol) and EtOH (5 mL). The resulting mixture was heated at 80 °C for the indicated time until the complete consumption of starting material as monitored by TLC or GC-MS analysis. After cooling, the reaction was diluted with EA and the organic phase was washed successively with water (3×25 mL) and brine (3×25 mL), dried over anhydrous Na<sub>2</sub>SO<sub>4</sub>, and filtered. The filtrate was concentrated in vacuo and the crude residue was purified by silica gel column chromatography (EA/Hexane) to afford desired product.

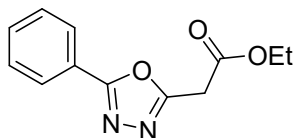

*Ethyl 2-(5-phenyl-1,3,4-oxadiazol-2-yl)acetate (2a)*. 110 mg, 95% yield; white solid;  $R_f = 0.36$  (EA-Hexane = 1:4,  $V:V$ ); m.p. 70-72 °C;  $^1\text{H NMR}$  (500 MHz,  $\text{CDCl}_3$ )  $\delta$  8.08–8.00 (m, 2H), 7.59–7.45 (m, 3H), 4.24 (q,  $J = 7.1$  Hz, 2H), 4.03 (s, 2H), 1.29 (t,  $J = 7.1$  Hz, 3H);  $^{13}\text{C}\{^1\text{H}\}$  NMR (125 MHz,  $\text{CDCl}_3$ )  $\delta$  166.4, 165.8, 160.4, 132.0, 129.2, 127.1, 123.8, 62.3, 32.2, 14.2; HRMS (ESI-TOF)  $m/z$  calcd for  $\text{C}_{12}\text{H}_{12}\text{N}_2\text{NaO}_3$   $[\text{M}+\text{Na}]^+$ : 255.0740, found: 255.0732.

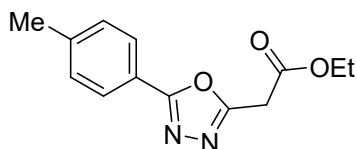

*Ethyl 2-(5-(p-tolyl)-1,3,4-oxadiazol-2-yl)acetate (2b)*. 106 mg, 86% yield; white solid;  $R_f = 0.32$  (EA-Hexane = 1:3,  $V:V$ ); m.p. 46-48 °C;  $^1\text{H NMR}$  (500 MHz,  $\text{CDCl}_3$ )  $\delta$  7.93 (d,  $J = 7.8$  Hz, 2H), 7.30 (d,  $J = 7.8$  Hz, 2H), 4.24 (q,  $J = 7.1$  Hz, 2H), 4.02 (s, 2H), 2.42 (s, 3H), 1.28 (t,  $J = 7.1$  Hz, 3H);  $^{13}\text{C}\{^1\text{H}\}$  NMR (125 MHz,  $\text{CDCl}_3$ )  $\delta$  166.5, 165.9, 160.2, 142.5, 129.9, 127.0, 121.0, 62.2, 32.2, 21.7, 14.2; HRMS (ESI-TOF)  $m/z$  calcd for  $\text{C}_{13}\text{H}_{14}\text{N}_2\text{NaO}_3$   $[\text{M}+\text{Na}]^+$ : 269.0897, found: 269.0890.

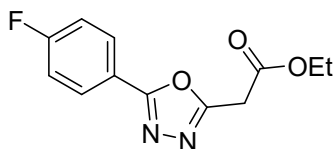

*Ethyl 2-(5-(4-fluorophenyl)-1,3,4-thiadiazol-2-yl)acetate (2c)*. 114 mg, 91% yield; white solid;  $R_f = 0.39$  (EA-Hexane = 1:3,  $V:V$ ); m.p. 86-88 °C;  $^1\text{H NMR}$  (500 MHz,  $\text{CDCl}_3$ )  $\delta$  8.08–8.00 (m, 2H), 7.22–7.14 (m, 2H), 4.24 (q,  $J = 7.1$  Hz, 2H), 4.02 (s, 2H), 1.28 (t,  $J = 7.1$  Hz, 3H);  $^{13}\text{C}\{^1\text{H}\}$  NMR (125 MHz,  $\text{CDCl}_3$ )  $\delta$  166.4, 164.9 (d,  $J = 253.0$  Hz), 164.9, 160.4, 129.4 (d,  $J = 9.0$  Hz), 120.1 (d,  $J = 3.2$  Hz), 116.5 (d,  $J = 22.3$  Hz), 62.3, 32.1, 14.2;  $^{19}\text{F}\{^1\text{H}\}$  NMR (376 MHz,  $\text{CDCl}_3$ )  $\delta$  -106.70; HRMS (ESI-TOF)  $m/z$  calcd for  $\text{C}_{12}\text{H}_{11}\text{FN}_2\text{NaO}_3$   $[\text{M}+\text{Na}]^+$ : 273.0646, found: 273.0650.

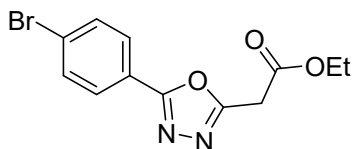

*Ethyl 2-(5-(4-bromophenyl)-1,3,4-thiadiazol-2-yl)acetate (2d)*. 135 mg, 87% yield; white solid;  $R_f = 0.24$  (EA-Hexane = 1:3,  $V:V$ ); m.p. 66-68 °C;  $^1\text{H NMR}$  (500 MHz,  $\text{CDCl}_3$ )  $\delta$  7.89 (d,  $J = 8.3$  Hz, 2H), 7.63 (d,  $J = 8.3$  Hz, 2H), 4.23 (q,  $J = 7.1$  Hz, 2H), 4.01 (s, 2H), 1.27 (t,  $J = 7.1$  Hz, 3H);  $^{13}\text{C}\{^1\text{H}\}$  NMR (125

MHz, CDCl<sub>3</sub>) δ 166.3, 165.0, 160.6, 132.5, 128.4, 126.6, 122.7, 62.3, 32.1, 14.2; HRMS (ESI-TOF) *m/z* calcd for C<sub>12</sub>H<sub>11</sub>BrN<sub>2</sub>NaO<sub>3</sub> [M+Na]<sup>+</sup>: 332.9845, found: 332.9840.

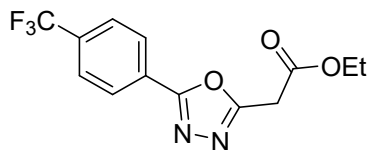

*Ethyl 2-(5-(4-(trifluoromethyl)phenyl)-1,3,4-oxadiazol-2-yl) acetate (2e)*. 119 mg, 79% yield; white solid; *R<sub>f</sub>* = 0.37 (EA-Hexane = 1:3, *V:V*); m.p. 59-60 °C; <sup>1</sup>H NMR (500 MHz, CDCl<sub>3</sub>) δ 8.18 (d, *J* = 8.2 Hz, 2H), 7.77 (d, *J* = 8.2 Hz, 2H), 4.25 (q, *J* = 7.1 Hz, 2H), 4.06 (s, 2H), 1.29 (t, *J* = 7.1 Hz, 3H); <sup>13</sup>C{<sup>1</sup>H} NMR (125 MHz, CDCl<sub>3</sub>) δ 166.2, 164.6, 161.1, 133.6 (q, *J* = 32.9 Hz), 127.4, 127.1 (d, *J* = 1.4 Hz), 126.3 (q, *J* = 3.8 Hz), 123.7 (q, *J* = 272.6 Hz), 62.4, 32.2, 14.2; <sup>19</sup>F{<sup>1</sup>H} NMR (376 MHz, CDCl<sub>3</sub>) δ -63.16; HRMS (ESI-TOF) *m/z* calcd for C<sub>13</sub>H<sub>11</sub>F<sub>3</sub>N<sub>2</sub>NaO<sub>3</sub> [M+Na]<sup>+</sup>: 323.0614, found: 323.0610.

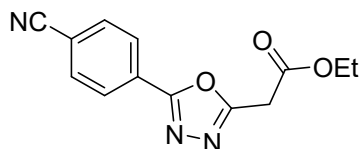

*Ethyl 2-(5-(4-cyanophenyl)-1,3,4-oxadiazol-2-yl)acetate (2f)*. 89 mg, 69% yield; white solid; *R<sub>f</sub>* = 0.25 (EA-Hexane = 1:3, *V:V*); m.p. 119-120 °C; <sup>1</sup>H NMR (500 MHz, CDCl<sub>3</sub>) δ 8.17 (d, *J* = 8.3 Hz, 2H), 7.81 (d, *J* = 8.3 Hz, 2H), 4.25 (q, *J* = 7.1 Hz, 2H), 4.06 (s, 2H), 1.30 (t, *J* = 7.1 Hz, 3H); <sup>13</sup>C{<sup>1</sup>H} NMR (125 MHz, CDCl<sub>3</sub>) δ 166.1, 164.3, 161.3, 133.0, 127.7, 127.6, 117.9, 115.5, 62.4, 32.2, 14.2; HRMS (ESI-TOF) *m/z* calcd for C<sub>13</sub>H<sub>11</sub>N<sub>3</sub>NaO<sub>3</sub> [M+Na]<sup>+</sup>: 280.0693, found: 280.0699.

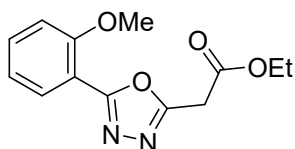

*Ethyl 2-(5-(2-methoxyphenyl)-1,3,4-oxadiazol-2-yl)acetate (2g)*. 111 mg, 85% yield; yellowish liquid; *R<sub>f</sub>* = 0.32 (EA-Hexane = 1:1, *V:V*); <sup>1</sup>H NMR (500 MHz, CDCl<sub>3</sub>) δ 7.90 (dd, *J* = 7.8, 1.8 Hz, 1H), 7.49 (t, *J* = 7.8 Hz, 1H), 7.09–7.00 (m, 2H), 4.22 (q, *J* = 7.1 Hz, 2H), 4.02 (s, 2H), 3.95 (s, 3H), 1.27 (t, *J* = 7.1 Hz, 3H); <sup>13</sup>C{<sup>1</sup>H} NMR (125 MHz, CDCl<sub>3</sub>) δ 166.5, 164.4, 160.1, 158.0, 133.3, 130.6, 120.8, 113.0, 112.1, 62.1, 56.1, 32.2, 14.2; HRMS (ESI-TOF) *m/z* calcd for C<sub>13</sub>H<sub>14</sub>N<sub>2</sub>NaO<sub>4</sub> [M+Na]<sup>+</sup>: 285.0846, found: 285.0855.

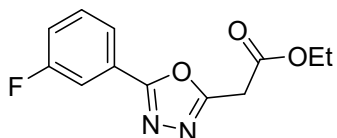

*Ethyl 2-(5-(3-fluorophenyl)-1,3,4-oxadiazol-2-yl)acetate (2h)*. 110 mg, 88% yield; white solid;  $R_f = 0.41$  (EA-Hexane = 1:3, *V:V*); m.p. 73-75 °C;  $^1\text{H NMR}$  (500 MHz,  $\text{CDCl}_3$ )  $\delta$  7.85 (d,  $J = 7.8$  Hz, 1H), 7.78–7.71 (m, 1H), 7.53–7.46 (m, 1H), 7.26–7.22 (m, 1H), 4.25 (q,  $J = 7.1$  Hz, 2H), 4.03 (s, 2H), 1.30 (t,  $J = 7.1$  Hz, 3H);  $^{13}\text{C}\{^1\text{H}\}$  NMR (125 MHz,  $\text{CDCl}_3$ )  $\delta$  166.3, 164.8 (d,  $J = 3.5$  Hz), 163.0 (d,  $J = 247.9$  Hz), 160.8, 131.1 (d,  $J = 8.1$  Hz), 125.7 (d,  $J = 8.7$  Hz), 122.9 (d,  $J = 3.2$  Hz), 119.1 (d,  $J = 21.1$  Hz), 114.2 (d,  $J = 24.5$  Hz), 62.4, 32.2, 14.2;  $^{19}\text{F}\{^1\text{H}\}$  NMR (376 MHz,  $\text{CDCl}_3$ )  $\delta$  -111.07; HRMS (ESI-TOF)  $m/z$  calcd for  $\text{C}_{12}\text{H}_{11}\text{FN}_2\text{NaO}_3$   $[\text{M}+\text{Na}]^+$ : 273.0646, found: 273.0650.

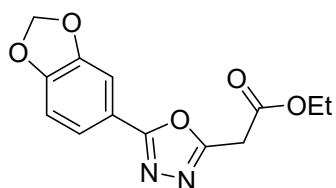

*Ethyl 2-(5-(benzo[d][1,3]dioxol-5-yl)-1,3,4-oxadiazol-2-yl)acetate (2i)*. 123 mg, 89% yield; white solid;  $R_f = 0.27$  (EA-Hexane = 1:3, *V:V*); m.p. 69-71 °C;  $^1\text{H NMR}$  (500 MHz,  $\text{CDCl}_3$ )  $\delta$  7.56 (d,  $J = 8.1$  Hz, 1H), 7.46 (s, 1H), 6.88 (d,  $J = 8.1$  Hz, 1H), 6.03 (s, 2H), 4.22 (q,  $J = 7.1$  Hz, 2H), 3.98 (s, 2H), 1.27 (t,  $J = 7.1$  Hz, 3H);  $^{13}\text{C}\{^1\text{H}\}$  NMR (125 MHz,  $\text{CDCl}_3$ )  $\delta$  166.4, 165.5, 160.0, 150.8, 148.4, 122.1, 117.6, 108.9, 107.1, 102.0, 62.2, 32.1, 14.1; HRMS (ESI-TOF)  $m/z$  calcd for  $\text{C}_{13}\text{H}_{12}\text{N}_2\text{NaO}_5$   $[\text{M}+\text{Na}]^+$ : 299.0638, found: 299.0631.

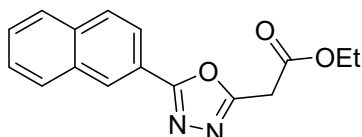

*Ethyl 2-(5-(naphthalen-2-yl)-1,3,4-oxadiazol-2-yl)acetate (2j)*. 117 mg, 83% yield; pink solid;  $R_f = 0.45$  (EA-Hexane = 1:3, *V:V*); m.p. 81-83 °C;  $^1\text{H NMR}$  (500 MHz,  $\text{CDCl}_3$ )  $\delta$  8.54 (s, 1H), 8.12 (dd,  $J = 8.6$ , 1.5 Hz, 1H), 7.97–7.91 (m, 2H), 7.88 (d,  $J = 7.6$  Hz, 1H), 7.61–7.52 (m, 2H), 4.27 (q,  $J = 7.1$  Hz, 2H), 4.07 (s, 2H), 1.30 (t,  $J = 7.1$  Hz, 3H);  $^{13}\text{C}\{^1\text{H}\}$  NMR (125 MHz,  $\text{CDCl}_3$ )  $\delta$  166.5, 166.0, 160.5, 134.9, 132.9, 129.2, 129.0, 128.2, 128.1, 127.6, 127.2, 123.3, 121.0, 62.3, 32.2, 14.2; HRMS (ESI-TOF)  $m/z$  calcd for  $\text{C}_{16}\text{H}_{14}\text{N}_2\text{NaO}_3$   $[\text{M}+\text{Na}]^+$ : 305.0897, found: 305.0900.

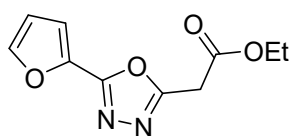

*Ethyl 2-(5-(furan-2-yl)-1,3,4-oxadiazol-2-yl)acetate (2k)*. 104 mg, 94% yield; colorless liquid;  $R_f = 0.26$  (EA-Hexane = 1:3, *V:V*);  $^1\text{H NMR}$  (500 MHz,  $\text{CDCl}_3$ )  $\delta$  7.56 (d,  $J = 1.1$  Hz, 1H), 7.11–7.02 (m, 1H),

6.54–6.46 (m, 1H), 4.14 (q,  $J = 7.1$  Hz, 2H), 3.94 (s, 2H), 1.18 (t,  $J = 7.1$  Hz, 3H);  $^{13}\text{C}\{^1\text{H}\}$  NMR (125 MHz,  $\text{CDCl}_3$ )  $\delta$  166.1, 159.6, 158.3, 145.7, 139.1, 114.2, 112.1, 62.0, 31.7, 13.9; HRMS (ESI-TOF)  $m/z$  calcd for  $\text{C}_{10}\text{H}_{10}\text{N}_2\text{NaO}_4$   $[\text{M}+\text{Na}]^+$ : 245.0533, found: 245.0530.

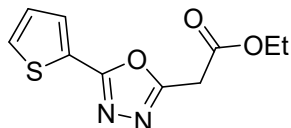

*Ethyl 2-(5-(thiophen-2-yl)-1,3,4-oxadiazol-2-yl)acetate (2l)*. 116 mg, 97% yield; yellowish liquid;  $R_f = 0.23$  (EA-Hexane = 1:3,  $V:V$ );  $^1\text{H}$  NMR (500 MHz,  $\text{CDCl}_3$ )  $\delta$  7.71 (d,  $J = 3.6$  Hz, 1H), 7.52 (d,  $J = 5.0$  Hz, 1H), 7.12 (t,  $J = 4.3$  Hz, 1H), 4.20 (q,  $J = 7.1$  Hz, 2H), 3.98 (s, 2H), 1.25 (t,  $J = 7.1$  Hz, 3H);  $^{13}\text{C}\{^1\text{H}\}$  NMR (125 MHz,  $\text{CDCl}_3$ )  $\delta$  166.2, 161.9, 159.8, 130.4, 130.0, 128.2, 124.9, 62.2, 32.0, 14.1; HRMS (ESI-TOF)  $m/z$  calcd for  $\text{C}_{10}\text{H}_{10}\text{N}_2\text{NaO}_3\text{S}$   $[\text{M}+\text{Na}]^+$ : 261.0304, found: 261.0312.

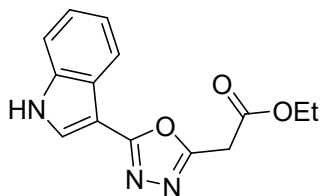

*Ethyl 2-(5-(1H-indol-3-yl)-1,3,4-oxadiazol-2-yl)acetate (2m)*. 109 mg, 80% yield; white solid;  $R_f = 0.37$  (EA-Hexane = 1:1,  $V:V$ ); m.p. 90–92 °C;  $^1\text{H}$  NMR (600 MHz,  $\text{DMSO}-d_6$ )  $\delta$  12.05 (s, 1H), 8.17 (d,  $J = 2.9$  Hz, 1H), 8.09 (d,  $J = 7.2$  Hz, 1H), 7.57–7.50 (m, 1H), 7.25 (dtd,  $J = 17.9, 7.2, 1.2$  Hz, 2H), 4.25 (s, 2H), 4.17 (q,  $J = 7.1$  Hz, 2H), 1.21 (t,  $J = 7.1$  Hz, 3H);  $^{13}\text{C}\{^1\text{H}\}$  NMR (150 MHz,  $\text{DMSO}-d_6$ )  $\delta$  167.3, 162.5, 158.7, 136.5, 128.2, 124.1, 123.0, 121.3, 120.2, 112.5, 99.3, 61.4, 31.4, 14.0; HRMS (ESI-TOF)  $m/z$  calcd for  $\text{C}_{14}\text{H}_{13}\text{N}_3\text{NaO}_3$   $[\text{M}+\text{Na}]^+$ : 294.0849, found: 294.0853.

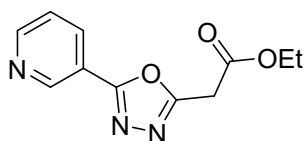

*Ethyl 2-(5-(pyridin-3-yl)-1,3,4-oxadiazol-2-yl)acetate (2n)*. 105 mg, 90% yield; white solid;  $R_f = 0.29$  (EA-Hexane = 1:1,  $V:V$ ); m.p. 79–81 °C;  $^1\text{H}$  NMR (500 MHz,  $\text{CDCl}_3$ )  $\delta$  9.25 (s, 1H), 8.76 (d,  $J = 4.2$  Hz, 1H), 8.33 (d,  $J = 7.5$  Hz, 1H), 7.45 (t,  $J = 7.5$  Hz, 1H), 4.24 (q,  $J = 7.1$  Hz, 2H), 4.05 (s, 2H), 1.28 (t,  $J = 7.1$  Hz, 3H);  $^{13}\text{C}\{^1\text{H}\}$  NMR (125 MHz,  $\text{CDCl}_3$ )  $\delta$  166.2, 163.7, 161.0, 152.7, 148.0, 134.3, 123.9, 120.3, 62.3, 32.1, 14.2; HRMS (ESI-TOF)  $m/z$  calcd for  $\text{C}_{11}\text{H}_{11}\text{N}_3\text{NaO}_3$   $[\text{M}+\text{Na}]^+$ : 256.0693, found: 256.0699.

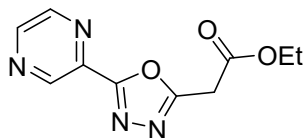

*Ethyl 2-(5-(pyrazin-2-yl)-1,3,4-oxadiazol-2-yl)acetate (2o)*. 109 mg, 93% yield; yellowish liquid;  $R_f = 0.41$  (EA-Hexane = 1:1,  $V:V$ );  $^1\text{H NMR}$  (500 MHz,  $\text{CDCl}_3$ )  $\delta$  9.44 (d,  $J = 1.3$  Hz, 1H), 8.73 (d,  $J = 2.5$  Hz, 1H), 8.72–8.70 (m, 1H), 4.21 (q,  $J = 7.1$  Hz, 2H), 4.07 (s, 2H), 1.25 (t,  $J = 7.1$  Hz, 3H);  $^{13}\text{C}\{^1\text{H}\}$  NMR (125 MHz,  $\text{CDCl}_3$ )  $\delta$  165.9, 163.1, 162.0, 146.8, 144.7, 144.3, 139.5, 62.4, 32.1, 14.1; HRMS (ESI-TOF)  $m/z$  calcd for  $\text{C}_{10}\text{H}_{10}\text{N}_4\text{NaO}_3$   $[\text{M}+\text{Na}]^+$ : 257.0645, found: 257.0650.

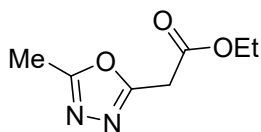

*Ethyl 2-(5-methyl-1,3,4-oxadiazol-2-yl)acetate (2p)*. 78 mg, 92% yield; colorless liquid;  $R_f = 0.38$  (EA-Hexane = 1:2,  $V:V$ );  $^1\text{H NMR}$  (600 MHz,  $\text{CDCl}_3$ )  $\delta$  4.17 (q,  $J = 7.1$  Hz, 2H), 3.87 (s, 2H), 2.49 (s, 3H), 1.23 (t,  $J = 7.1$  Hz, 3H);  $^{13}\text{C}\{^1\text{H}\}$  NMR (150 MHz,  $\text{CDCl}_3$ )  $\delta$  166.5, 164.7, 160.6, 62.1, 31.9, 14.1, 11.0; HRMS (ESI-TOF)  $m/z$  calcd for  $\text{C}_7\text{H}_{10}\text{N}_2\text{NaO}_3$   $[\text{M}+\text{Na}]^+$ : 193.0584, found: 193.0589.

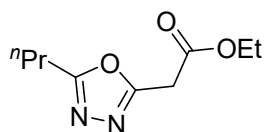

*Ethyl 2-(5-propyl-1,3,4-oxadiazol-2-yl)acetate (2q)*. 93 mg, 94% yield; colorless liquid;  $R_f = 0.32$  (EA-Hexane = 1:3,  $V:V$ );  $^1\text{H NMR}$  (500 MHz,  $\text{CDCl}_3$ )  $\delta$  4.18 (q,  $J = 7.1$  Hz, 2H), 3.88 (s, 2H), 2.79 (t,  $J = 7.4$  Hz, 2H), 1.78 (sext,  $J = 7.4$  Hz, 2H), 1.23 (t,  $J = 7.1$  Hz, 3H), 0.98 (t,  $J = 7.4$  Hz, 3H);  $^{13}\text{C}\{^1\text{H}\}$  NMR (125 MHz,  $\text{CDCl}_3$ )  $\delta$  167.8, 166.4, 160.3, 61.9, 31.8, 27.1, 19.9, 14.0, 13.4; HRMS (ESI-TOF)  $m/z$  calcd for  $\text{C}_9\text{H}_{14}\text{N}_2\text{NaO}_3$   $[\text{M}+\text{Na}]^+$ : 221.0897, found: 221.0890.

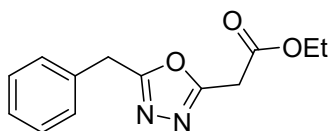

*Ethyl 2-(5-benzyl-1,3,4-oxadiazol-2-yl)acetate (2r)*. 106 mg, 86% yield; white solid;  $R_f = 0.25$  (EA-Hexane = 1:3,  $V:V$ ); m.p. 81–83 °C;  $^1\text{H NMR}$  (500 MHz,  $\text{CDCl}_3$ )  $\delta$  7.35–7.24 (m, 5H), 4.19 (s, 2H), 4.16 (q,  $J = 7.1$  Hz, 2H), 3.88 (s, 2H), 1.20 (t,  $J = 7.1$  Hz, 3H);  $^{13}\text{C}\{^1\text{H}\}$  NMR (125 MHz,  $\text{CDCl}_3$ )  $\delta$  166.4, 166.3, 161.0, 133.8, 129.0, 128.8, 127.6, 62.1, 32.0, 31.8, 14.0; HRMS (ESI-TOF)  $m/z$  calcd for  $\text{C}_{13}\text{H}_{14}\text{N}_2\text{NaO}_3$   $[\text{M}+\text{Na}]^+$ : 269.0897, found: 269.0893.

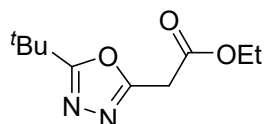

*Ethyl 2-(5-(tert-butyl)-1,3,4-oxadiazol-2-yl)acetate (2s)*. 87 mg, 82% yield; colorless liquid;  $R_f = 0.38$  (EA-Hexane = 1:3, *V:V*);  $^1\text{H NMR}$  (500 MHz,  $\text{CDCl}_3$ )  $\delta$  4.20 (q,  $J = 7.1$  Hz, 2H), 3.91 (s, 2H), 1.40 (s, 9H), 1.25 (t,  $J = 7.1$  Hz, 3H);  $^{13}\text{C}\{^1\text{H}\}$  NMR (125 MHz,  $\text{CDCl}_3$ )  $\delta$  174.3, 166.5, 160.4, 62.0, 32.5, 32.1, 28.1, 14.1; HRMS (ESI-TOF)  $m/z$  calcd for  $\text{C}_{10}\text{H}_{16}\text{N}_2\text{NaO}_3$   $[\text{M}+\text{Na}]^+$ : 235.1053, found: 235.1045.

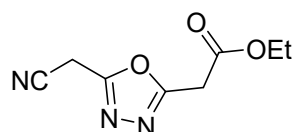

*Ethyl 2-(5-(cyanomethyl)-1,3,4-oxadiazol-2-yl)acetate (2t)*. 71 mg, 73% yield; white solid;  $R_f = 0.24$  (EA-Hexane = 1:2, *V:V*); m.p. 84-87 °C;  $^1\text{H NMR}$  (500 MHz,  $\text{CDCl}_3$ )  $\delta$  4.23 (q,  $J = 7.1$  Hz, 2H), 4.07 (s, 2H), 3.98 (s, 2H), 1.28 (t,  $J = 7.1$  Hz, 3H);  $^{13}\text{C}\{^1\text{H}\}$  NMR (125 MHz,  $\text{CDCl}_3$ )  $\delta$  165.9, 162.3, 158.0, 112.1, 62.5, 31.9, 16.0, 14.1; HRMS (ESI-TOF)  $m/z$  calcd for  $\text{C}_8\text{H}_9\text{N}_3\text{NaO}_3$   $[\text{M}+\text{Na}]^+$ : 218.0536, found: 218.0530.

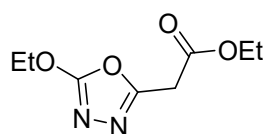

*Ethyl 2-(5-ethoxy-1,3,4-oxadiazol-2-yl)acetate (2u)*. 85 mg, 85% yield; colorless liquid;  $R_f = 0.24$  (EA-Hexane = 1:3, *V:V*);  $^1\text{H NMR}$  (500 MHz,  $\text{CDCl}_3$ )  $\delta$  4.51 (q,  $J = 7.1$  Hz, 2H), 4.18 (q,  $J = 7.1$  Hz, 2H), 3.77 (s, 2H), 1.44 (t,  $J = 7.1$  Hz, 3H), 1.24 (t,  $J = 7.1$  Hz, 3H);  $^{13}\text{C}\{^1\text{H}\}$  NMR (125 MHz,  $\text{CDCl}_3$ )  $\delta$  166.3, 166.2, 156.0, 69.1, 61.9, 32.2, 14.1, 14.0; HRMS (ESI-TOF)  $m/z$  calcd for  $\text{C}_8\text{H}_{12}\text{N}_2\text{NaO}_4$   $[\text{M}+\text{Na}]^+$ : 223.0689, found: 223.0693.

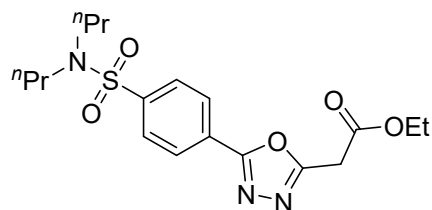

*Ethyl 2-(5-(4-(N,N-dipropylsulfamoyl)phenyl)-1,3,4-oxadiazol-2-yl)acetate (2v)*. 134 mg, 68% yield; white solid;  $R_f = 0.46$  (EA-Hexane = 1:2, *V:V*); m.p. 87-90 °C;  $^1\text{H NMR}$  (500 MHz,  $\text{CDCl}_3$ )  $\delta$  8.16 (d,  $J = 8.1$  Hz, 2H), 7.91 (d,  $J = 8.1$  Hz, 2H), 4.23 (q,  $J = 7.1$  Hz, 2H), 4.04 (s, 2H), 3.16-3.04 (m, 4H), 1.53 (sext,  $J = 7.4$  Hz, 4H), 1.27 (t,  $J = 7.1$  Hz, 3H), 0.84 (t,  $J = 7.4$  Hz, 6H);  $^{13}\text{C}\{^1\text{H}\}$  NMR (125 MHz,  $\text{CDCl}_3$ )



$\delta$  166.2, 164.5, 161.1, 143.4, 127.8, 127.6, 127.1, 62.3, 49.9, 32.1, 22.0, 14.1, 11.2; HRMS (ESI-TOF)  $m/z$  calcd for  $C_{18}H_{25}N_3NaO_5S$   $[M+Na]^+$ : 418.1407, found: 418.1412.

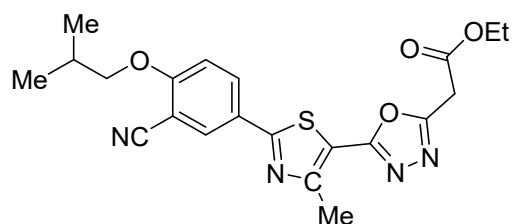

*Ethyl 2-(5-(2-(3-cyano-4-isobutoxyphenyl)-4-methylthiazol-5-yl)-1,3,4-oxadiazol-2-yl) acetate (2w)*. 128 mg, 60% yield; white solid;  $R_f$  = 0.24 (EA-Hexane = 1:3,  $V:V$ ); m.p. 143-145 °C;  $^1H$  NMR (500 MHz,  $CDCl_3$ )  $\delta$  8.16 (s, 1H), 8.07 (d,  $J$  = 8.7 Hz, 1H), 7.02 (d,  $J$  = 8.7 Hz, 1H), 4.25 (q,  $J$  = 7.1 Hz, 2H), 4.03 (s, 2H), 3.90 (d,  $J$  = 6.4 Hz, 2H), 2.81 (s, 3H), 2.27 – 2.13 (m, 1H), 1.30 (t,  $J$  = 7.1 Hz, 3H), 1.08 (d,  $J$  = 6.7 Hz, 6H);  $^{13}C\{^1H\}$  NMR (125 MHz,  $CDCl_3$ )  $\delta$  166.6, 166.1, 162.6, 160.7, 160.0, 157.4, 132.6, 132.1, 125.8, 115.4, 114.3, 112.9, 103.2, 75.9, 62.3, 32.0, 28.3, 19.1, 17.6, 14.2; HRMS (ESI-TOF)  $m/z$  calcd for  $C_{21}H_{22}N_4NaO_4S$   $[M+Na]^+$ : 449.1254, found: 449.1244.

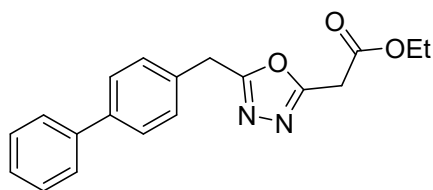

*Ethyl 2-(5-([1,1'-biphenyl]-4-ylmethyl)-1,3,4-oxadiazol-2-yl) acetate (2x)*. 140 mg, 87% yield; white solid;  $R_f$  = 0.32 (EA-Hexane = 1:3,  $V:V$ ); m.p. 74-76 °C;  $^1H$  NMR (500 MHz,  $CDCl_3$ )  $\delta$  7.56 (d,  $J$  = 7.5 Hz, 4H), 7.46–7.41 (m, 2H), 7.40–7.31 (m, 3H), 4.25 (s, 2H), 4.19 (q,  $J$  = 7.0 Hz, 2H), 3.91 (s, 2H), 1.23 (t,  $J$  = 7.0 Hz, 3H);  $^{13}C\{^1H\}$  NMR (125 MHz,  $CDCl_3$ )  $\delta$  166.4, 166.4, 161.1, 140.7, 140.6, 132.8, 129.3, 128.9, 127.7, 127.6, 127.2, 62.1, 32.1, 31.6, 14.1; HRMS (ESI-TOF)  $m/z$  calcd for  $C_{19}H_{18}N_2NaO_3$   $[M+Na]^+$ : 345.1210, found: 345.1202.

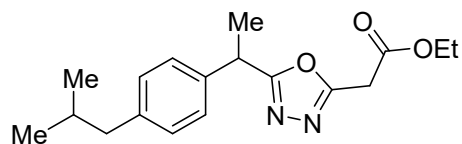

*Ethyl 2-(5-(1-(4-isobutylphenyl)ethyl)-1,3,4-oxadiazol-2-yl) acetate (2y)*. 130 mg, 82% yield; colorless liquid;  $R_f$  = 0.43 (EA-Hexane = 1:3,  $V:V$ );  $^1H$  NMR (500 MHz,  $CDCl_3$ )  $\delta$  7.16 (d,  $J$  = 7.9 Hz, 2H), 7.08 (d,  $J$  = 7.9 Hz, 2H), 4.31 (q,  $J$  = 7.1 Hz, 1H), 4.15 (q,  $J$  = 7.1 Hz, 2H), 3.92–3.81 (m, 2H), 2.42 (d,  $J$  = 7.2 Hz, 2H), 1.87 – 1.77 (m, 1H), 1.73 (d,  $J$  = 7.1 Hz, 3H), 1.18 (t,  $J$  = 7.1 Hz, 3H), 0.87 (d,  $J$  = 6.5 Hz, 6H);  $^{13}C\{^1H\}$  NMR (125 MHz,  $CDCl_3$ )  $\delta$  170.0, 166.3, 160.7, 141.0, 137.5, 129.6, 127.0, 62.0, 45.0,

37.1, 32.0, 30.2, 22.4, 19.5, 14.0; HRMS (ESI-TOF)  $m/z$  calcd for  $C_{18}H_{24}N_2NaO_3$   $[M+Na]^+$ : 339.1679, found: 339.1686.

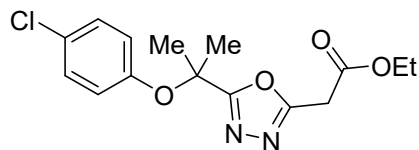

*Ethyl 2-(5-(2-(4-chlorophenoxy)propan-2-yl)-1,3,4-oxadiazol-2-yl)acetate (2z)*. 138 mg, 85% yield; colorless liquid;  $R_f = 0.31$  (EA-Hexane = 1:3,  $V:V$ );  $^1H$  NMR (500 MHz,  $CDCl_3$ )  $\delta$  7.15 (d,  $J = 8.6$  Hz, 2H), 6.67 (d,  $J = 8.6$  Hz, 2H), 4.20 (q,  $J = 7.1$  Hz, 2H), 3.98 (s, 2H), 1.79 (s, 6H), 1.24 (t,  $J = 7.1$  Hz, 3H);  $^{13}C\{^1H\}$  NMR (125 MHz,  $CDCl_3$ )  $\delta$  169.2, 166.2, 161.5, 153.2, 129.5, 129.2, 123.0, 75.6, 62.3, 32.1, 26.0, 14.1; HRMS (ESI-TOF)  $m/z$  calcd for  $C_{15}H_{17}ClN_2NaO_4$   $[M+Na]^+$ : 347.0769, found: 347.0777.

#### (B) General Procedure for the Synthesis of 1,3,4-Thiadiazole Compounds.

To a 15 mL sealed tube was added **3** (0.50 mmol), Ethyl 3, 3, 3-trifluoropropionate (0.55 mmol),  $Na_2CO_3$  (0.75 mmol) and EtOH (5 mL). The resulting mixture was heated at 80 °C for the indicated time until the complete consumption of starting material as monitored by TLC or GC-MS analysis. After cooling, the reaction was diluted with EA and organic phase was washed successively with water (3×25 mL) and brine (3×25 mL), dried over anhydrous  $Na_2SO_4$ , and filtered. The filtrate was concentrated in vacuo and purified by silica gel column chromatography (EA/Hexane) to afford desired product.

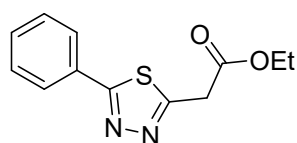

*Ethyl 2-(5-phenyl-1,3,4-thiadiazol-2-yl)acetate (4a)*. 110 mg, 89% yield; yellow solid;  $R_f = 0.31$  (EA-Hexane = 1:5,  $V:V$ ); m.p. 88-90 °C;  $^1H$  NMR (500 MHz,  $CDCl_3$ )  $\delta$  8.00–7.88 (m, 2H), 7.53–7.44 (m, 3H), 4.26 (q,  $J = 7.1$  Hz, 2H), 4.22 (s, 2H), 1.31 (t,  $J = 7.1$  Hz, 3H);  $^{13}C\{^1H\}$  NMR (125 MHz,  $CDCl_3$ )  $\delta$  170.1, 168.6, 161.6, 131.2, 130.2, 129.3, 128.0, 62.2, 36.1, 14.2; HRMS (ESI-TOF)  $m/z$  calcd for  $C_{12}H_{12}N_2NaO_2S$   $[M+Na]^+$ : 271.0512, found: 271.0517.

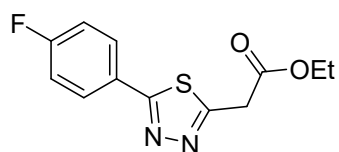

*Ethyl 2-(5-(4-fluorophenyl)-1,3,4-thiadiazol-2-yl)acetate (4b)*. 83 mg, 62% yield; yellow solid;  $R_f = 0.38$

(EA-Hexane = 1:5, *V:V*); m.p. 86-88 °C; <sup>1</sup>H NMR (500 MHz, CDCl<sub>3</sub>) δ 7.98–7.92 (m, 2H), 7.19–7.14 (m, 2H), 4.26 (q, *J* = 7.1 Hz, 2H), 4.21 (s, 2H), 1.32 (t, *J* = 7.1 Hz, 3H); <sup>13</sup>C{<sup>1</sup>H} NMR (125 MHz, CDCl<sub>3</sub>) δ 168.9, 168.5, 164.5 (d, *J* = 252.3 Hz), 161.6, 130.0 (d, *J* = 9.1 Hz), 126.5 (d, *J* = 3.3 Hz), 116.5 (d, *J* = 22.2 Hz), 62.2, 36.1, 14.2; <sup>19</sup>F{<sup>1</sup>H} NMR (376 MHz, CDCl<sub>3</sub>) δ -108.44; HRMS (ESI-TOF) *m/z* calcd for C<sub>12</sub>H<sub>11</sub>FN<sub>2</sub>NaO<sub>2</sub>S [M+Na]<sup>+</sup>: 289.0417, found: 289.0424.

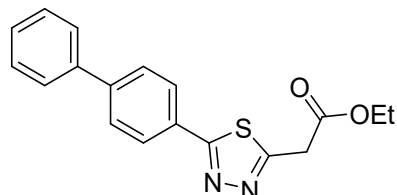

*Ethyl 2-(5-([1,1'-biphenyl]-4-yl)-1,3,4-thiadiazol-2-yl)acetate (4c)*. 117 mg, 72% yield; yellow solid; *R<sub>f</sub>* = 0.31 (EA-Hexane = 1:5, *V:V*); m.p. 75-77 °C; <sup>1</sup>H NMR (500 MHz, CDCl<sub>3</sub>) δ 8.04 (d, *J* = 8.3 Hz, 2H), 7.71 (d, *J* = 8.3 Hz, 2H), 7.65–7.62 (m, 2H), 7.47 (t, *J* = 7.6 Hz, 2H), 7.39 (t, *J* = 7.3 Hz, 1H), 4.28 (q, *J* = 7.1 Hz, 2H), 4.23 (s, 2H), 1.33 (t, *J* = 7.1 Hz, 3H); <sup>13</sup>C{<sup>1</sup>H} NMR (125 MHz, CDCl<sub>3</sub>) δ 169.8, 168.6, 161.5, 144.0, 140.0, 129.1, 129.1, 128.4, 128.2, 127.9, 127.2, 62.2, 36.1, 14.2; HRMS (ESI-TOF) *m/z* calcd for C<sub>18</sub>H<sub>16</sub>N<sub>2</sub>NaO<sub>2</sub>S [M+Na]<sup>+</sup>: 347.0825, found: 347.0817.

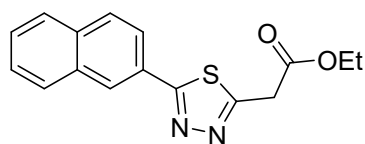

*Ethyl 2-(5-(naphthalen-2-yl)-1,3,4-thiadiazol-2-yl)acetate (4d)*. 128 mg, 86% yield; yellow solid; *R<sub>f</sub>* = 0.41 (EA-Hexane = 1:5, *V:V*); m.p. 65-67 °C; <sup>1</sup>H NMR (500 MHz, CDCl<sub>3</sub>) δ 8.42 (s, 1H), 8.09 (dd, *J* = 8.3, 1.8 Hz, 1H), 7.95–7.90 (m, 2H), 7.89–7.84 (m, 1H), 7.60–7.50 (m, 2H), 4.28 (q, *J* = 7.1 Hz, 2H), 4.24 (s, 2H), 1.33 (t, *J* = 7.1 Hz, 3H); <sup>13</sup>C{<sup>1</sup>H} NMR (125 MHz, CDCl<sub>3</sub>) δ 170.3, 168.6, 161.6, 134.7, 133.2, 129.2, 128.8, 128.3, 128.0, 127.8, 127.6, 127.1, 124.6, 62.2, 36.2, 14.2; HRMS (ESI-TOF) *m/z* calcd for C<sub>16</sub>H<sub>14</sub>N<sub>2</sub>NaO<sub>2</sub>S [M+Na]<sup>+</sup>: 321.0668, found: 321.0678.

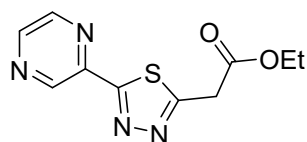

*Ethyl 2-(5-(pyrazin-2-yl)-1,3,4-thiadiazol-2-yl)acetate (4e)*. 88 mg, 70% yield; yellow solid; *R<sub>f</sub>* = 0.23 (EA-Hexane = 1:4, *V:V*); m.p. 69-71 °C; <sup>1</sup>H NMR (500 MHz, CDCl<sub>3</sub>) δ 9.56 (s, 1H), 8.64 (d, *J* = 26.1 Hz, 2H), 4.27 (q, *J* = 7.1 Hz, 2H), 4.24 (s, 2H), 1.31 (t, *J* = 7.1 Hz, 3H); <sup>13</sup>C{<sup>1</sup>H} NMR (125 MHz, CDCl<sub>3</sub>) δ 169.3, 168.2, 164.4, 146.1, 145.0, 144.4, 142.6, 62.2, 36.2, 14.2; HRMS (ESI-TOF) *m/z* calcd

for  $C_{10}H_{10}N_4NaO_2S$   $[M+Na]^+$ : 273.0417, found: 273.0410.

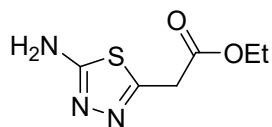

*Ethyl 2-(5-amino-1,3,4-thiadiazol-2-yl)acetate (4f)*. 57 mg, 61% yield; yellow solid;  $R_f = 0.18$  (EA-Hexane = 1:1,  $V:V$ ); m.p. 138-140 °C;  $^1H$  NMR (500 MHz,  $DMSO-d_6$ )  $\delta$  7.11 (s, 2H), 4.12 (q,  $J = 7.1$  Hz, 2H), 3.96 (s, 2H), 1.20 (t,  $J = 7.1$  Hz, 3H);  $^{13}C\{^1H\}$  NMR (125 MHz,  $DMSO-d_6$ )  $\delta$  169.5, 168.8, 150.3, 60.9, 35.4, 14.0; HRMS (ESI-TOF)  $m/z$  calcd for  $C_6H_9N_3NaO_2S$   $[M+Na]^+$ : 210.0308, found: 210.0315.

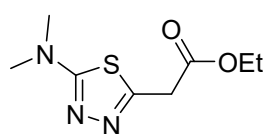

*Ethyl 2-(5-(dimethylamino)-1,3,4-thiadiazol-2-yl)acetate (4g)*. 88 mg, 82% yield; yellow liquid;  $R_f = 0.21$  (EA-Hexane = 1:1,  $V:V$ );  $^1H$  NMR (500 MHz,  $CDCl_3$ )  $\delta$  4.15 (q,  $J = 7.1$  Hz, 2H), 3.90 (s, 2H), 3.08 (s, 6H), 1.23 (t,  $J = 7.1$  Hz, 3H).  $^{13}C\{^1H\}$  NMR (125 MHz,  $CDCl_3$ )  $\delta$  173.0, 168.9, 150.7, 61.6, 41.4, 36.2, 14.1.; HRMS (ESI-TOF)  $m/z$  calcd for  $C_8H_{13}N_3NaO_2S$   $[M+Na]^+$ : 238.0621, found: 238.0617.

### (C) General Procedure for the Synthesis of 1,2,4-Triazole Compounds.

To a 15 mL sealed tube was added **5** (0.50 mmol), Ethyl 3, 3, 3-trifluoropropionate (0.55 mmol),  $Na_2CO_3$  (0.75 mmol) and EtOH (5 mL). The resulting mixture was heated at 80 °C for the indicated time until the complete consumption of starting material as monitored by TLC or GC-MS analysis. After cooling, the reaction was diluted with EA and organic phase was washed successively with water (3×25 mL) and brine (3×25 mL), dried over anhydrous  $Na_2SO_4$ , and filtered. The filtrate was concentrated in vacuo and purified by silica gel column chromatography (EA/Hexane) to afford desired product.

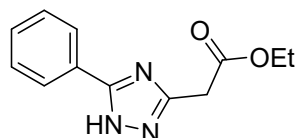

*Ethyl 2-(5-phenyl-1H-1,2,4-triazol-3-yl)acetate (6a)*. 65 mg, 56% yield; yellow liquid;  $R_f = 0.30$  (EA-Hexane = 2:3,  $V:V$ );  $^1H$  NMR (500 MHz,  $CDCl_3$ )  $\delta$  12.64 (brs, 1H), 8.01–7.93 (m, 2H), 7.40–7.33 (m, 3H), 4.21 (q,  $J = 7.1$  Hz, 2H), 3.97 (s, 2H), 1.27 (t,  $J = 7.1$  Hz, 3H);  $^{13}C\{^1H\}$  NMR (125 MHz,  $CDCl_3$ )  $\delta$  169.7, 160.1, 153.2, 129.8, 129.4, 128.8, 126.5, 62.0, 33.3, 14.2; HRMS (ESI-TOF)  $m/z$  calcd for  $C_{12}H_{13}N_3NaO_2$   $[M+Na]^+$ : 254.0900, found: 254.0905.

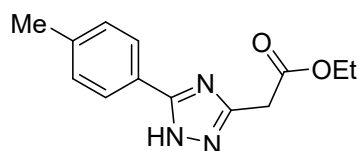

*Ethyl 2-(5-(p-tolyl)-1H-1,2,4-triazol-3-yl)acetate (6b)*. 37 mg, 30% yield; yellow liquid;  $R_f = 0.45$  (EA-Hexane = 1:1,  $V:V$ );  $^1\text{H NMR}$  (500 MHz,  $\text{CDCl}_3$ )  $\delta$  12.79 (brs, 1H), 7.82 (d,  $J = 7.8$  Hz, 2H), 7.15 (d,  $J = 7.8$  Hz, 2H), 4.19 (q,  $J = 7.1$  Hz, 2H), 3.93 (s, 2H), 2.34 (s, 3H), 1.25 (t,  $J = 7.1$  Hz, 3H);  $^{13}\text{C}\{^1\text{H}\}$  NMR (125 MHz,  $\text{CDCl}_3$ )  $\delta$  169.7, 159.6, 153.8, 139.9, 129.5, 129.2, 126.5, 61.8, 33.5, 21.5, 14.2; HRMS (ESI-TOF)  $m/z$  calcd for  $\text{C}_{13}\text{H}_{15}\text{N}_3\text{NaO}_2$   $[\text{M}+\text{Na}]^+$ : 268.1056, found: 268.1050.

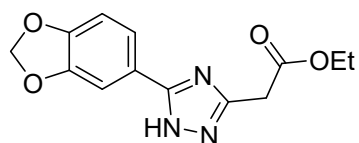

*Ethyl 2-(5-(benzo[d][1,3]dioxol-5-yl)-1H-1,2,4-triazol-3-yl)acetate (6c)*. 55 mg, 40% yield; yellow solid;  $R_f = 0.40$  (EA-Hexane = 1:1,  $V:V$ ); m.p. 92-94 °C;  $^1\text{H NMR}$  (500 MHz,  $\text{CDCl}_3$ )  $\delta$  12.35 (brs, 1H), 7.58-7.38 (m, 2H), 6.81 (d,  $J = 7.7$  Hz, 1H), 5.98 (s, 2H), 4.23 (q,  $J = 6.9$  Hz, 2H), 3.95 (s, 2H), 1.29 (t,  $J = 6.9$  Hz, 3H);  $^{13}\text{C}\{^1\text{H}\}$  NMR (125 MHz,  $\text{CDCl}_3$ )  $\delta$  169.8, 160.1, 152.7, 149.0, 148.1, 123.8, 120.8, 108.6, 107.0, 101.5, 62.0, 33.3, 14.2; HRMS (ESI-TOF)  $m/z$  calcd for  $\text{C}_{13}\text{H}_{13}\text{N}_3\text{NaO}_4$   $[\text{M}+\text{Na}]^+$ : 298.0798, found: 298.0805.

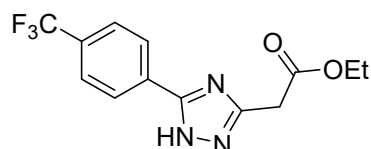

*Ethyl 2-(5-(4-(trifluoromethyl)phenyl)-1H-1,2,4-triazol-3-yl)acetate (6d)*. 43 mg, 29% yield; yellow solid;  $R_f = 0.41$  (EA-Hexane = 1:1,  $V:V$ ); m.p. 88-89 °C;  $^1\text{H NMR}$  (500 MHz,  $\text{CDCl}_3$ )  $\delta$  12.26 (brs, 1H), 8.23-8.09 (m, 2H), 7.67 (d,  $J = 8.1$  Hz, 2H), 4.29 (q,  $J = 7.1$  Hz, 2H), 4.04 (s, 2H), 1.33 (t,  $J = 7.1$  Hz, 3H);  $^{13}\text{C}\{^1\text{H}\}$  NMR (125 MHz,  $\text{CDCl}_3$ )  $\delta$  169.6, 160.4, 151.2, 133.9, 131.4 (q,  $J = 33.3$  Hz), 126.8, 125.8 (q,  $J = 3.7$  Hz), 124.2 (q,  $J = 272.1$  Hz), 62.3, 32.8, 14.2;  $^{19}\text{F}\{^1\text{H}\}$  NMR (376 MHz,  $\text{CDCl}_3$ )  $\delta$  -62.75; HRMS (ESI-TOF)  $m/z$  calcd for  $\text{C}_{13}\text{H}_{12}\text{F}_3\text{N}_3\text{NaO}_2$   $[\text{M}+\text{Na}]^+$ : 322.0774, found: 322.0766.

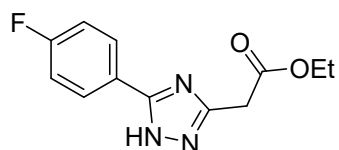

*Ethyl 2-(5-(4-fluorophenyl)-1H-1,2,4-triazol-3-yl)acetate (6e)*. 45 mg, 36% yield; yellow solid;  $R_f = 0.20$  (EA-Hexane = 1:2,  $V:V$ ); m.p. 100-102 °C;  $^1\text{H NMR}$  (500 MHz,  $\text{CDCl}_3$ )  $\delta$  12.56 (brs, 1H), 8.07-7.84 (m,

2H), 7.06 (t,  $J = 8.5$  Hz, 2H), 4.23 (q,  $J = 7.1$  Hz, 2H), 3.97 (s, 2H), 1.28 (t,  $J = 7.1$  Hz, 3H);  $^{13}\text{C}\{^1\text{H}\}$  NMR (125 MHz,  $\text{CDCl}_3$ )  $\delta$  169.7, 163.8 (d,  $J = 249.3$  Hz), 160.4, 152.2, 128.5 (d,  $J = 8.4$  Hz), 126.1, 115.8 (d,  $J = 21.9$  Hz), 62.1, 33.1, 14.2;  $^{19}\text{F}\{^1\text{H}\}$  NMR (376 MHz,  $\text{CDCl}_3$ )  $\delta$  -111.39; HRMS (ESI-TOF)  $m/z$  calcd for  $\text{C}_{12}\text{H}_{12}\text{FN}_3\text{NaO}_2$   $[\text{M}+\text{Na}]^+$ : 272.0806, found: 272.0812.

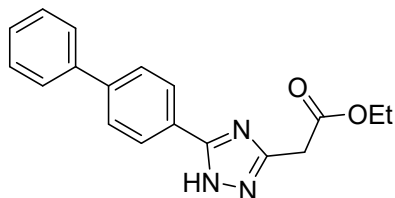

*Ethyl 2-(5-([1,1'-biphenyl]-4-yl)-1H-1,2,4-triazol-3-yl)acetate (6f)*. 66 mg, 43% yield; yellow solid;  $R_f = 0.39$  (EA-Hexane = 1:1,  $V:V$ ); m.p. 106-108 °C;  $^1\text{H}$  NMR (500 MHz,  $\text{DMSO}-d_6$ )  $\delta$  14.14 (brs, 1H), 8.08 (d,  $J = 8.1$  Hz, 2H), 7.80 (d,  $J = 7.4$  Hz, 2H), 7.73 (d,  $J = 7.7$  Hz, 2H), 7.48 (t,  $J = 7.6$  Hz, 2H), 7.39 (t,  $J = 7.3$  Hz, 1H), 4.14 (q,  $J = 7.1$  Hz, 2H), 3.90 (s, 2H), 1.21 (t,  $J = 7.1$  Hz, 3H);  $^{13}\text{C}\{^1\text{H}\}$  NMR (125 MHz,  $\text{DMSO}-d_6$ )  $\delta$  168.7, 160.4, 153.9, 140.9, 139.4, 129.0, 127.8, 127.0, 126.6, 126.4, 60.7, 33.4, 14.0; HRMS (ESI-TOF)  $m/z$  calcd for  $\text{C}_{18}\text{H}_{17}\text{N}_3\text{NaO}_2$   $[\text{M}+\text{Na}]^+$ : 330.1213, found: 330.1217.

#### (D) Procedure for the Synthesis of 7.

A solution of KOH (23 mg, 0.39 mmol) in ethanol was added to a solution of **2a** (69 mg, 0.30 mmol) in ethanol, the mixture was stirred at room temperature for 6 h (monitored by TLC). The precipitated solid was filtered and treated with 1N HCl. After acidification, it was filtered again into afford white solid **7**.

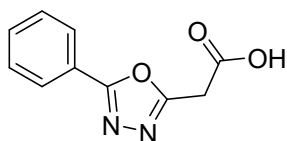

*2-(5-phenyl-1,3,4-thiadiazol-2-yl)acetic acid (7)*. 50 mg, 81% yield; white solid;  $R_f = 0.16$  (EA-Hexane = 1:1,  $V:V$ ); m.p. 111-112 °C;  $^1\text{H}$  NMR (500 MHz,  $\text{DMSO}-d_6$ )  $\delta$  8.00–7.95 (m, 2H), 7.63–7.57 (m, 3H), 4.09 (s, 2H);  $^{13}\text{C}\{^1\text{H}\}$  NMR (125 MHz,  $\text{DMSO}-d_6$ )  $\delta$  168.5, 164.4, 162.0, 132.0, 129.5, 126.4, 123.3, 32.2; HRMS (ESI-TOF)  $m/z$  calcd for  $\text{C}_{10}\text{H}_8\text{N}_2\text{NaO}_3$   $[\text{M}+\text{Na}]^+$ : 227.0427, found: 227.0435.

#### (E) Procedure for the Synthesis of 8.

To a solution of **2a** (69 mg, 0.30 mmol) in toluene (3 mL) was added benzylamine (64 mg, 0.60 mmol) and the resulting mixture was heated to reflux for 8 h. After cooling, the solvent was evaporated under reduced pressure and the residue was purified by column chromatography (EA-Hexane = 1:5) to afford

compound **8**.

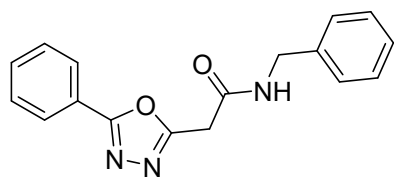

*N*-benzyl-2-(5-phenyl-1,3,4-thiadiazol-2-yl)acetamide (**8**). 62 mg, 70% yield; white solid;  $R_f$  = 0.25 (EA-Hexane = 1:2, *V:V*); m.p. 105-107 °C;  $^1\text{H}$  NMR (500 MHz,  $\text{CDCl}_3$ )  $\delta$  8.01 (d,  $J$  = 7.8 Hz, 2H), 7.57–7.47 (m, 4H), 7.35–7.26 (m, 5H), 4.49 (d,  $J$  = 5.6 Hz, 2H), 3.96 (s, 2H);  $^{13}\text{C}\{^1\text{H}\}$  NMR (125 MHz,  $\text{CDCl}_3$ )  $\delta$  165.4, 164.3, 161.8, 137.7, 132.1, 129.2, 128.8, 127.9, 127.7, 127.1, 123.4, 44.1, 33.5; HRMS (ESI-TOF)  $m/z$  calcd for  $\text{C}_{17}\text{H}_{15}\text{N}_3\text{NaO}_2$  [ $\text{M}+\text{Na}$ ] $^+$ : 316.1056, found: 316.1062.

#### (F) Procedure for the Synthesis of **9**.

To a stirred solution of **2a** (69 mg, 0.30 mmol) in 3 mL of tetrahydrofuran/water (5/1) was added  $\text{NaBH}_4$  (56 mg, 1.50 mmol) at 0 °C and the reaction mixture was slowly warmed to room temperature. Then additional  $\text{NaBH}_4$  (34 mg, 0.90 mmol) was added and stirred for 3 h at room temperature. After the reaction was carefully quenched with 1N HCl, the reaction mixture concentrated under reduced pressure to give crude product. The crude product was dissolved in EA then washed with brine and the organic layer was dried over anhydrous  $\text{Na}_2\text{SO}_4$ . The organic mixture was concentrated in vacuo and the residue was purified by column chromatography (EA-Hexane = 1:3) to afford **9**.

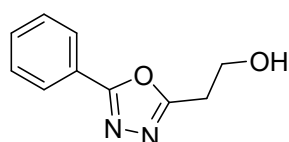

2-(5-phenyl-1,3,4-thiadiazol-2-yl)ethan-1-ol (**9**). 47 mg, 83% yield; colorless liquid;  $R_f$  = 0.20 (EA-Hexane = 1:2, *V:V*);  $^1\text{H}$  NMR (500 MHz,  $\text{CDCl}_3$ )  $\delta$  7.96 (d,  $J$  = 7.7 Hz, 2H), 7.51–7.41 (m, 3H), 4.11 (t,  $J$  = 5.8 Hz, 2H), 3.60 (s, 1H), 3.14 (t,  $J$  = 5.8 Hz, 2H);  $^{13}\text{C}\{^1\text{H}\}$  NMR (125 MHz,  $\text{CDCl}_3$ )  $\delta$  165.3, 165.0, 131.8, 129.1, 126.9, 123.8, 58.8, 29.2; HRMS (ESI-TOF)  $m/z$  calcd for  $\text{C}_{10}\text{H}_{10}\text{N}_2\text{NaO}_2$  [ $\text{M}+\text{Na}$ ] $^+$ : 213.0634, found: 213.0630.

#### (G) Procedure for the Synthesis of **10**.

To a solution of **2a** (69 mg, 0.30 mmol) in dry acetonitrile (3 mL) was added  $\text{K}_2\text{CO}_3$  (124 mg, 0.90 mmol),  $\text{CH}_3\text{CH}_2\text{Br}$  (81 mg, 0.75 mmol). The vigorously stirred mixture was heated to 85 °C for 3 h (monitored by TLC). After cooling, the mixture was filtered through a pad of celite. The organic mixture was concentrated in vacuo and the residue was purified by column chromatography (EA-Hexane = 1:5)

to afford **10**.

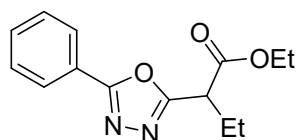

*Ethyl 2-(5-phenyl-1,3,4-thiadiazol-2-yl)butanoate (10)*. 59 mg, 76% yield; colorless liquid;  $R_f = 0.42$  (EA-Hexane = 1:3, V:V);  $^1\text{H NMR}$  (500 MHz,  $\text{CDCl}_3$ )  $\delta$  8.07–8.00 (m, 2H), 7.54–7.45 (m, 3H), 4.21 (q,  $J = 7.1$  Hz, 2H), 3.98 (t,  $J = 7.4$  Hz, 1H), 2.20 (ddq,  $J = 33.9, 14.2, 7.4$  Hz, 2H), 1.24 (t,  $J = 7.1$  Hz, 3H), 1.03 (t,  $J = 7.4$  Hz, 3H);  $^{13}\text{C}\{^1\text{H}\}$  NMR (125 MHz,  $\text{CDCl}_3$ )  $\delta$  169.2, 165.4, 163.8, 131.8, 129.1, 127.0, 123.9, 61.9, 45.2, 23.5, 14.2, 11.9; HRMS (ESI-TOF)  $m/z$  calcd for  $\text{C}_{14}\text{H}_{16}\text{N}_2\text{NaO}_3$   $[\text{M}+\text{Na}]^+$ : 283.1053, found: 283.1057.

#### (H) Procedure for the Synthesis of **11**.

Under  $\text{N}_2$  atmosphere, to a solution of **2d** (93 mg, 0.30 mmol) and  $\text{Pd}(\text{PPh}_3)_4$  (17 mg, 0.015 mmol) in dry toluene (5 mL) was added  $\text{K}_2\text{CO}_3$  (83 mg, 0.60 mmol), 4-ethoxycarbonylphenylboronic acid (116 mg, 0.60 mmol). The vigorously stirred mixture was heated to 90 °C for 5 h (monitored by TLC). After cooling, the mixture was filtered through a pad of celite, the filter cake was washed with EA. The organic mixture was concentrated in vacuo and the residue was purified by column chromatography (EA-Hexane = 1:7) to afford **11**.

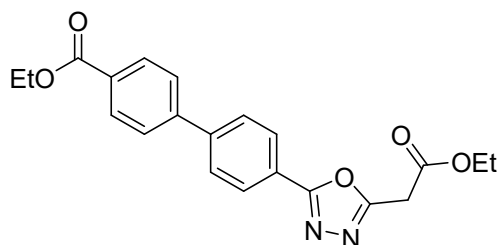

*Ethyl 4'-(5-(2-ethoxy-2-oxoethyl)-1,3,4-thiadiazol-2-yl)-[1,1'-biphenyl]-4-carboxylate (11)*. 68 mg, 60% yield; white solid;  $R_f = 0.26$  (EA-Hexane = 1:3, V:V); m.p. 87–88 °C;  $^1\text{H NMR}$  (500 MHz,  $\text{CDCl}_3$ )  $\delta$  8.13 (d,  $J = 8.0$  Hz, 4H), 7.74 (d,  $J = 7.9$  Hz, 2H), 7.68 (d,  $J = 7.9$  Hz, 2H), 4.40 (q,  $J = 7.1$  Hz, 2H), 4.25 (q,  $J = 7.1$  Hz, 2H), 4.05 (s, 2H), 1.41 (t,  $J = 7.1$  Hz, 3H), 1.29 (t,  $J = 7.1$  Hz, 3H);  $^{13}\text{C}\{^1\text{H}\}$  NMR (125 MHz,  $\text{CDCl}_3$ )  $\delta$  166.4, 166.4, 165.4, 160.5, 144.0, 143.4, 130.3, 130.2, 128.0, 127.6, 127.2, 123.3, 62.3, 61.2, 32.2, 14.4, 14.2; HRMS (ESI-TOF)  $m/z$  calcd for  $\text{C}_{21}\text{H}_{20}\text{N}_2\text{NaO}_5$   $[\text{M}+\text{Na}]^+$ : 403.1264, found: 403.1255.

#### Reference:

1 (a) S. A. Carvalho, L. O. Feitosa, M. Soares, T. E. M. M. Costa, M. G. Henriques, K. Salomão, S. L.



De Castro, M. Kaiser, R. Brun, J. L. Wardell, S. M.S.V. Wardell, G. H.G. Trossini, A. D. Andricopulo, E. F. Da Silva and C. A. M. Fraga, Design and Synthesis of New (*E*)-Cinnamic N-Acylhydrazones as Potent Antitrypanosomal Agents, *Eur. J. Med. Chem.*, 2012, **54**, 512–521. (b) M.-U. Nisa, M. A. Munawar, A. Iqbal, A. Ahmed, M. Ashraf, Q.-T.-A. A. Gardener and M. A. Khan, Synthesis of Novel 5-(Aroylhydrazinocarbonyl)escitalopram as Cholinesterase Inhibitors, *Eur. J. Med. Chem.*, 2017, **138**, 396–406.

2 N. B. Almandila, M. Tahaa, F. Rahimb, A. Wadoodc, S. Imrand, M. A. Alqahtanie, Y. A. Bamaroufe, M. Ibrahima, A. Mosaddika and M. Gollapallie, *Bioorg. Chem.*, 2019, **85**, 109–116.

3 (a) N. Lv, Z. Chen, Y. Liu, Z. Liu and Y. Zhang, Synthesis of Functionalized Indenones via Rh-Catalyzed C–H Activation Cascade Reaction, *Org. Lett.*, 2017, **19**, 2588–2591. (b) V. K. Burianova, D. S. Bolotin, A. S. Mikherdov, A. S. Novikov, P. P. Mokolokolo, A. Roodt, V. P. Boyarskiy, D. Dar'in, M. Krasavin, V. V. Suslonov, A. P. Zhdanov, K. Y. Zhizhind and N. T. Kuznetsovd, Mechanism of Generation of *closo*-Decaborato Amidrazones. Intramolecular Non-covalent B–H... $\pi$ (Ph) Interaction Determines Stabilization of the Configuration Around the Amidrazone C=N Bond, *New J. Chem.*, 2018, **42**, 8693–8703.

### 3. NMR Spectra

#### Ethyl 2-(5-phenyl-1,3,4-oxadiazol-2-yl)acetate (2a)

<sup>1</sup>H NMR (500 MHz, CDCl<sub>3</sub>) spectra of 2a

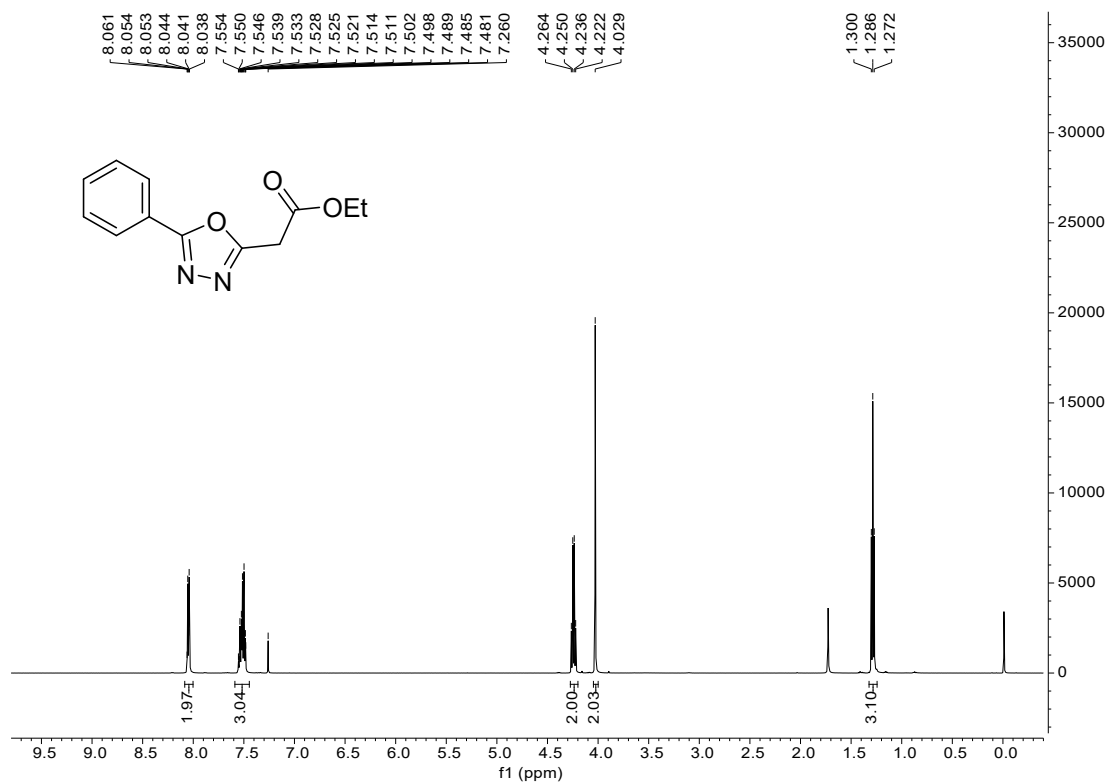

<sup>13</sup>C NMR (125 MHz, CDCl<sub>3</sub>) spectra of 2a

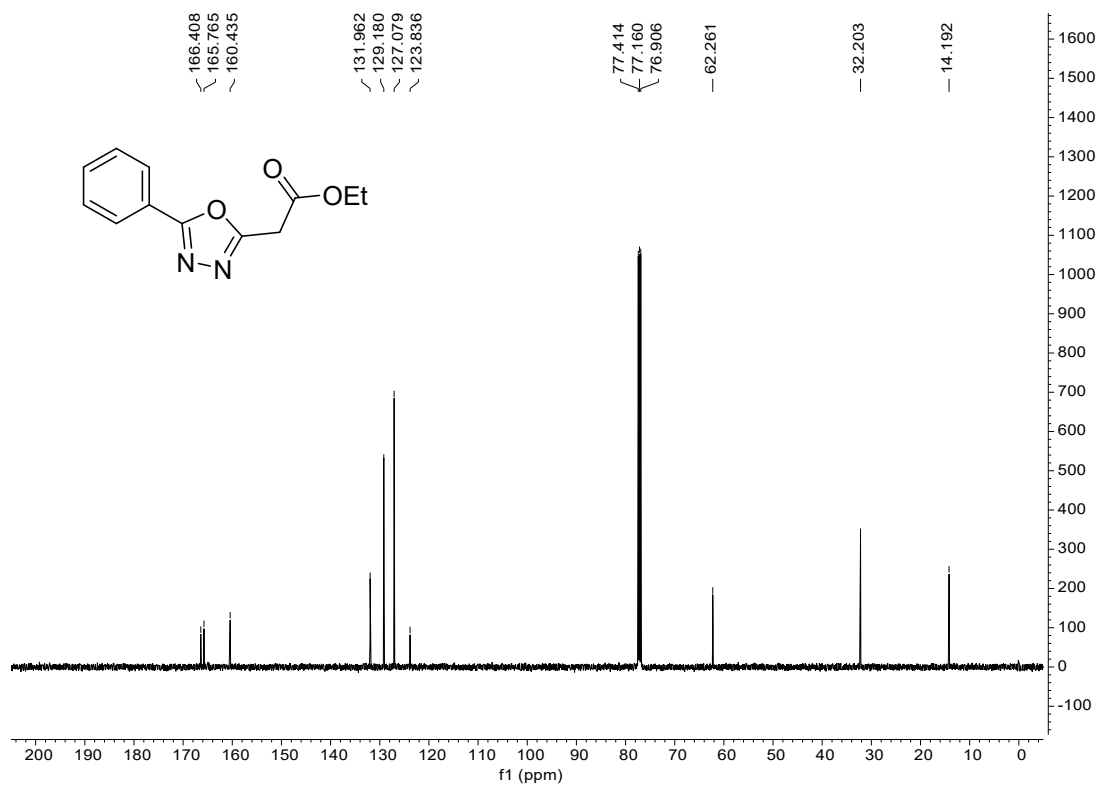

### Ethyl 2-(5-(p-tolyl)-1,3,4-oxadiazol-2-yl)acetate (2b)

<sup>1</sup>H NMR (500 MHz, CDCl<sub>3</sub>) spectra of 2b

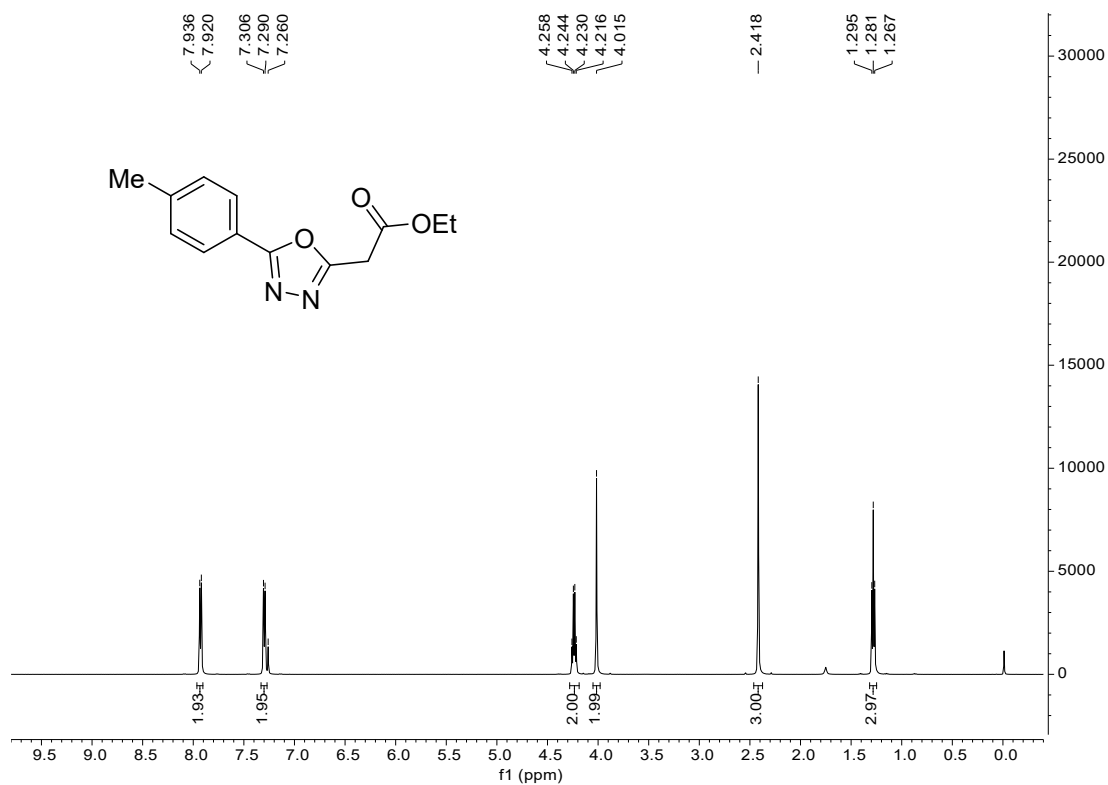

<sup>13</sup>C NMR (125 MHz, CDCl<sub>3</sub>) spectra of 2b

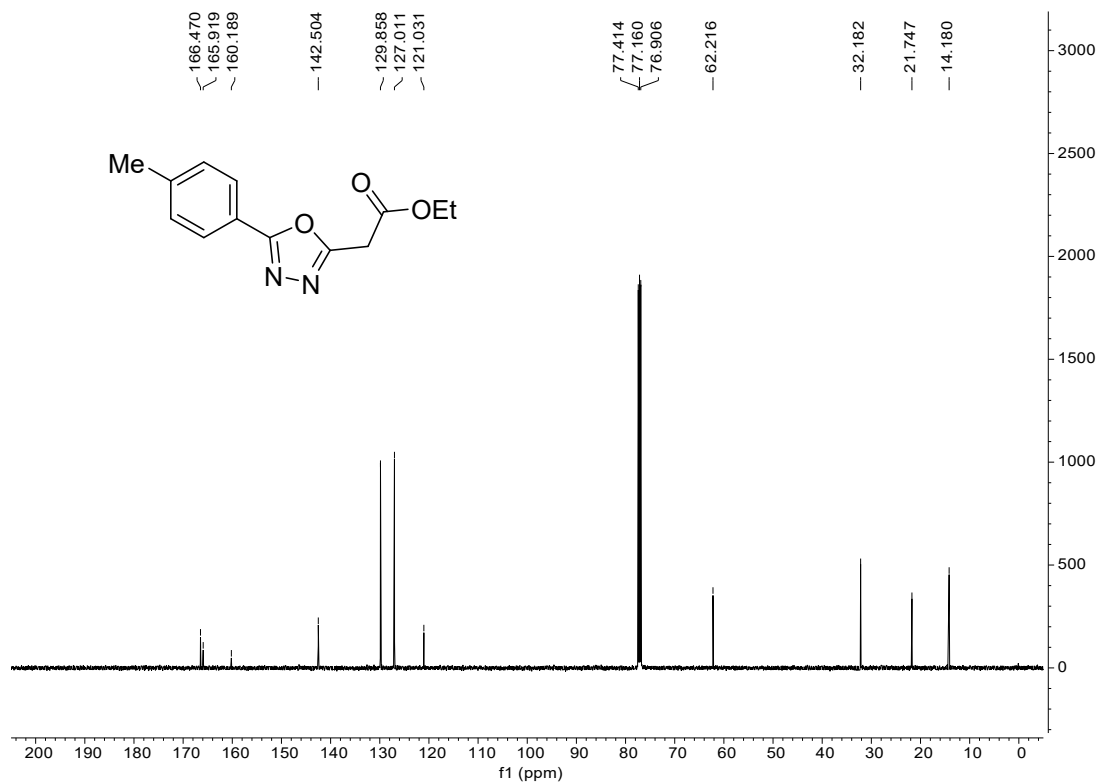

### Ethyl 2-(5-(4-fluorophenyl)-1,3,4-thiadiazol-2-yl)acetate (2c)

<sup>1</sup>H NMR (500 MHz, CDCl<sub>3</sub>) spectra of 2c

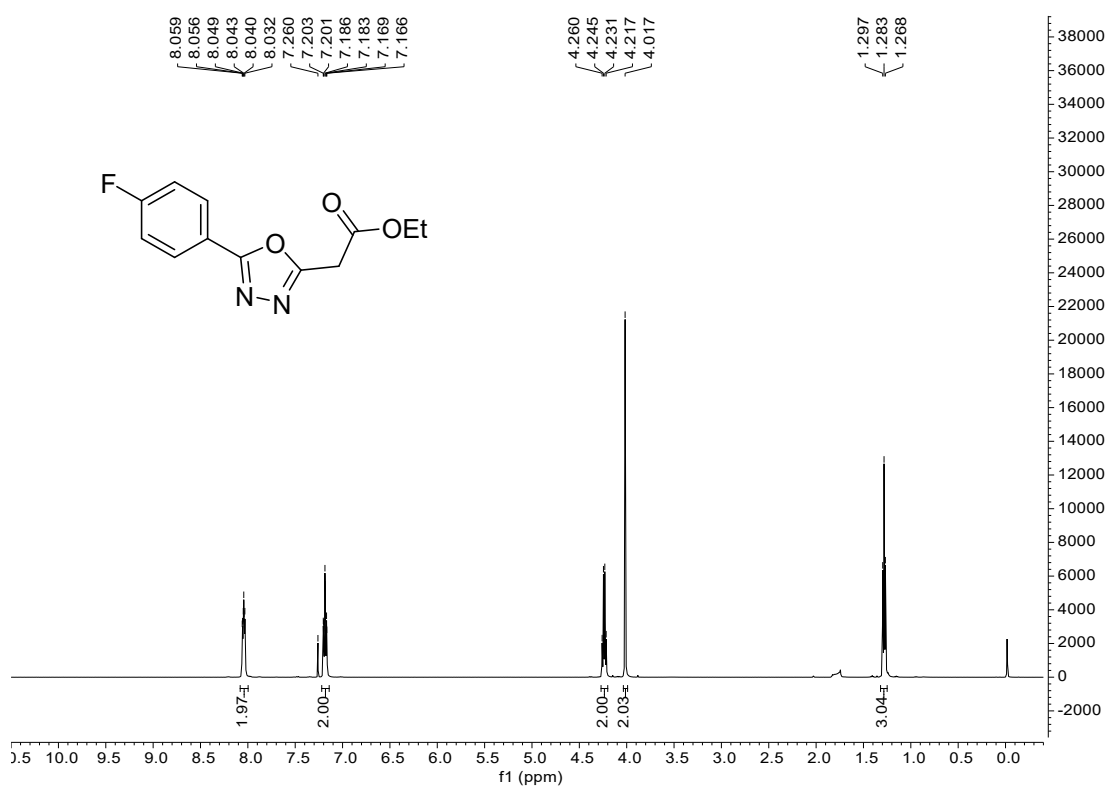

<sup>13</sup>C NMR (125 MHz, CDCl<sub>3</sub>) spectra of spectra of 2c

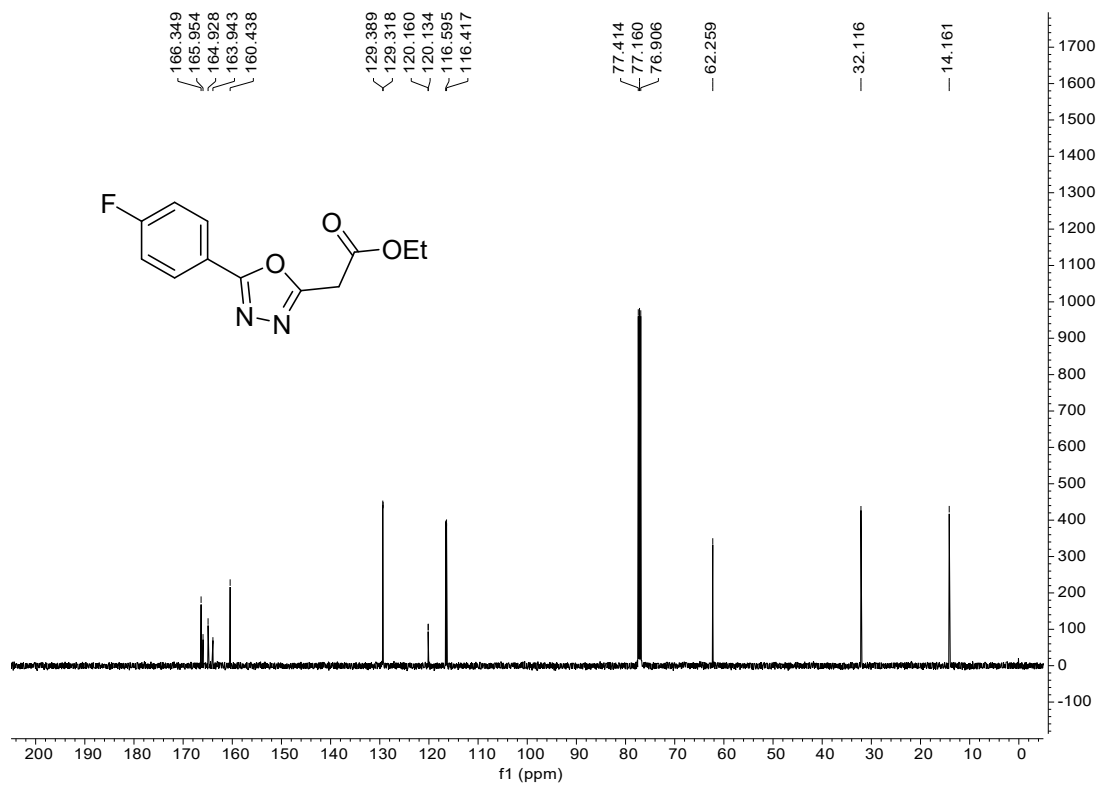

<sup>19</sup>F NMR (376 MHz, CDCl<sub>3</sub>) spectra of **2c**

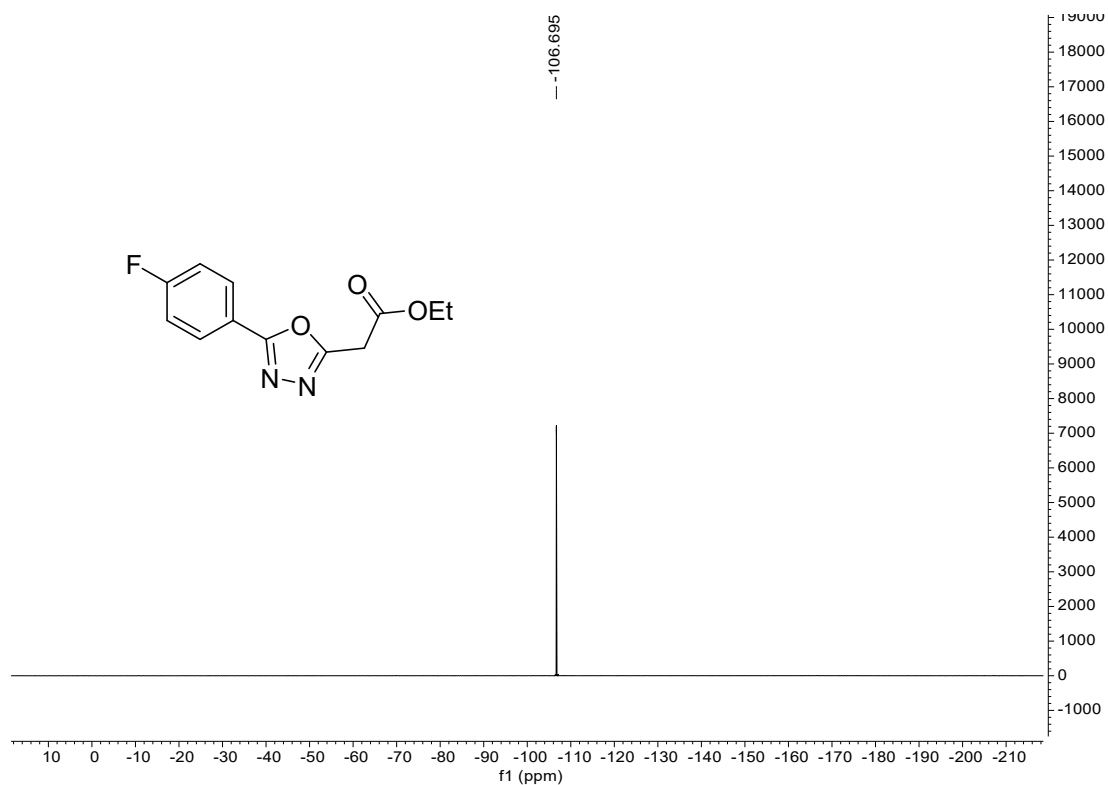

Ethyl 2-(5-(4-bromophenyl)-1,3,4-thiazol-2-yl)acetate (**2d**)

<sup>1</sup>H NMR (500 MHz, CDCl<sub>3</sub>) spectra of **2d**

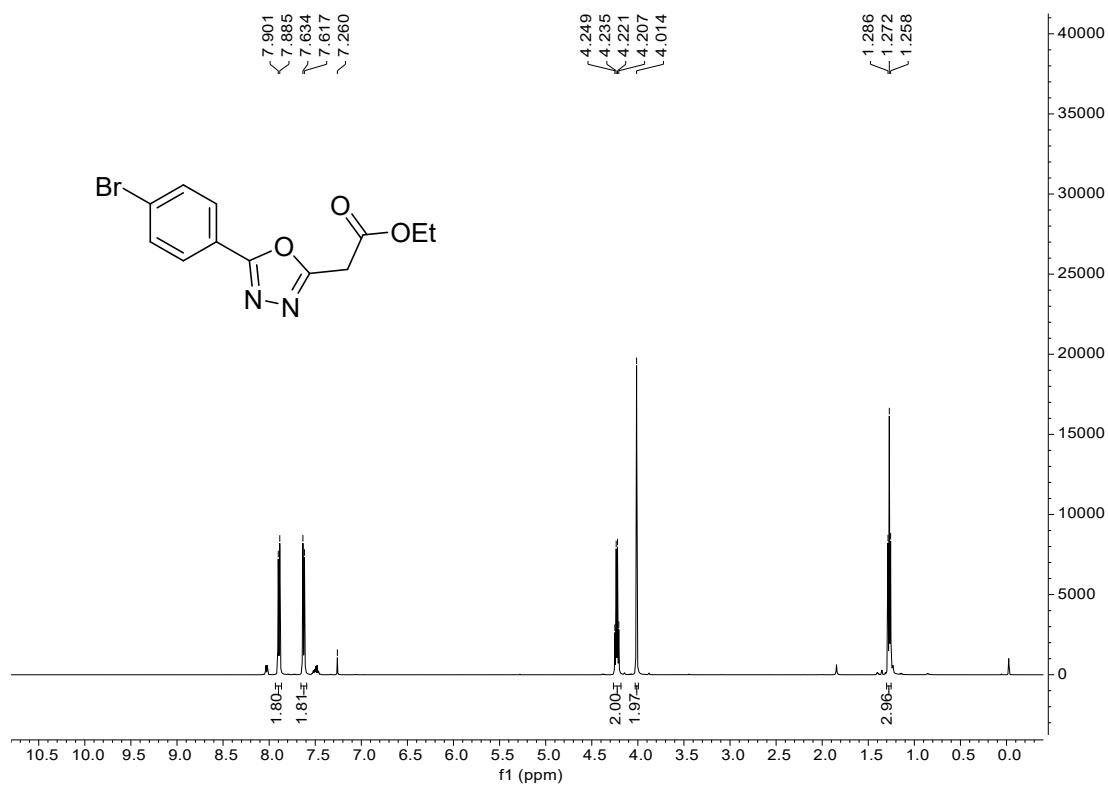

<sup>13</sup>C NMR (125 MHz, CDCl<sub>3</sub>) spectra of **2d**

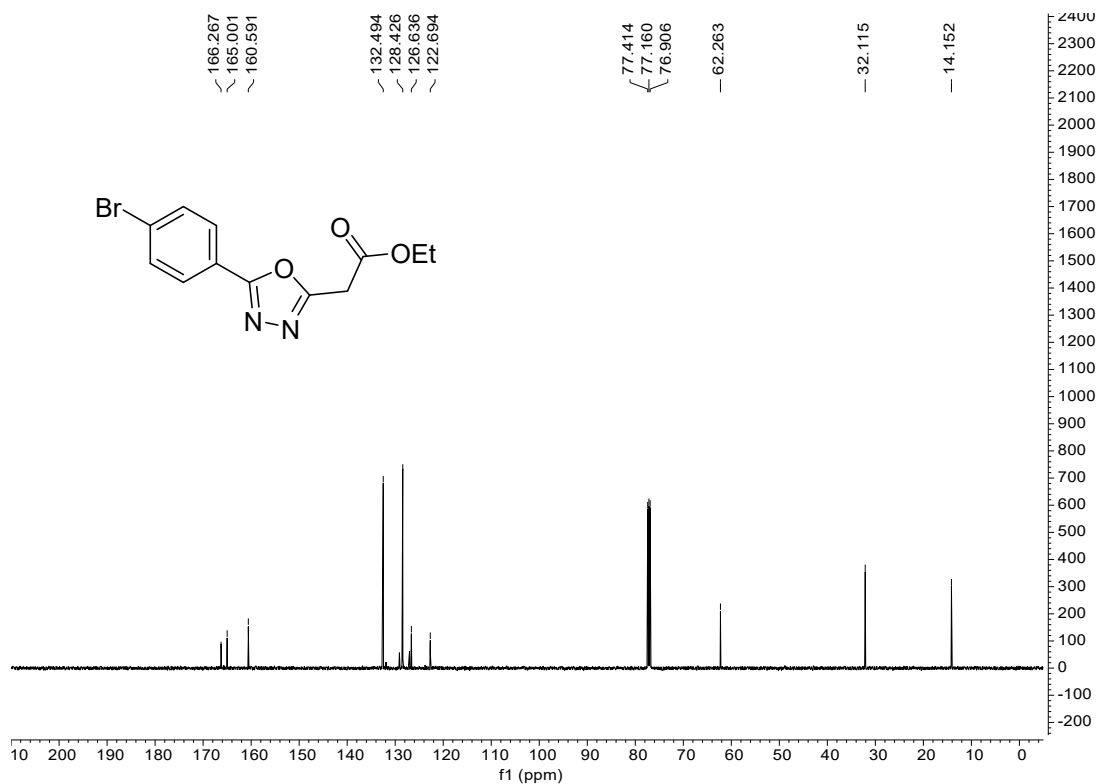

Ethyl 2-(5-(4-(trifluoromethyl)phenyl)-1,3,4-oxadiazol-2-yl)acetate (**2e**)

<sup>1</sup>H NMR (500 MHz, CDCl<sub>3</sub>) spectra of **2e**

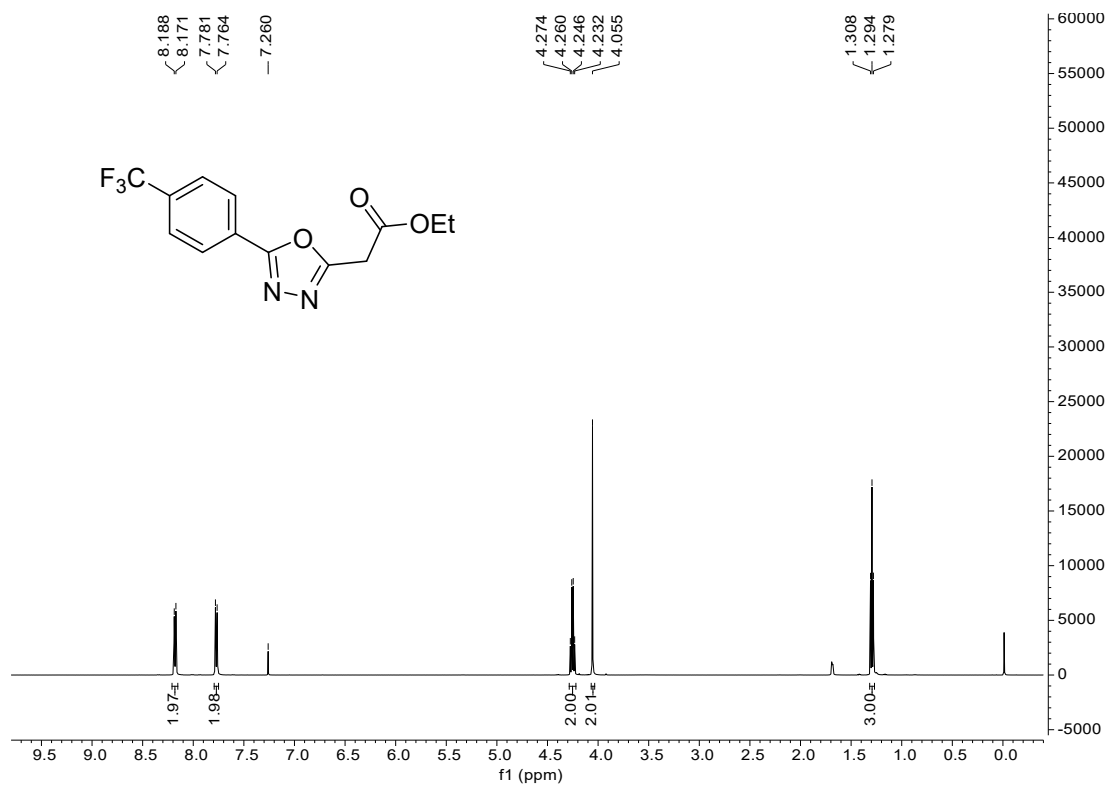

<sup>13</sup>C NMR (125 MHz, CDCl<sub>3</sub>) spectra of **2e**

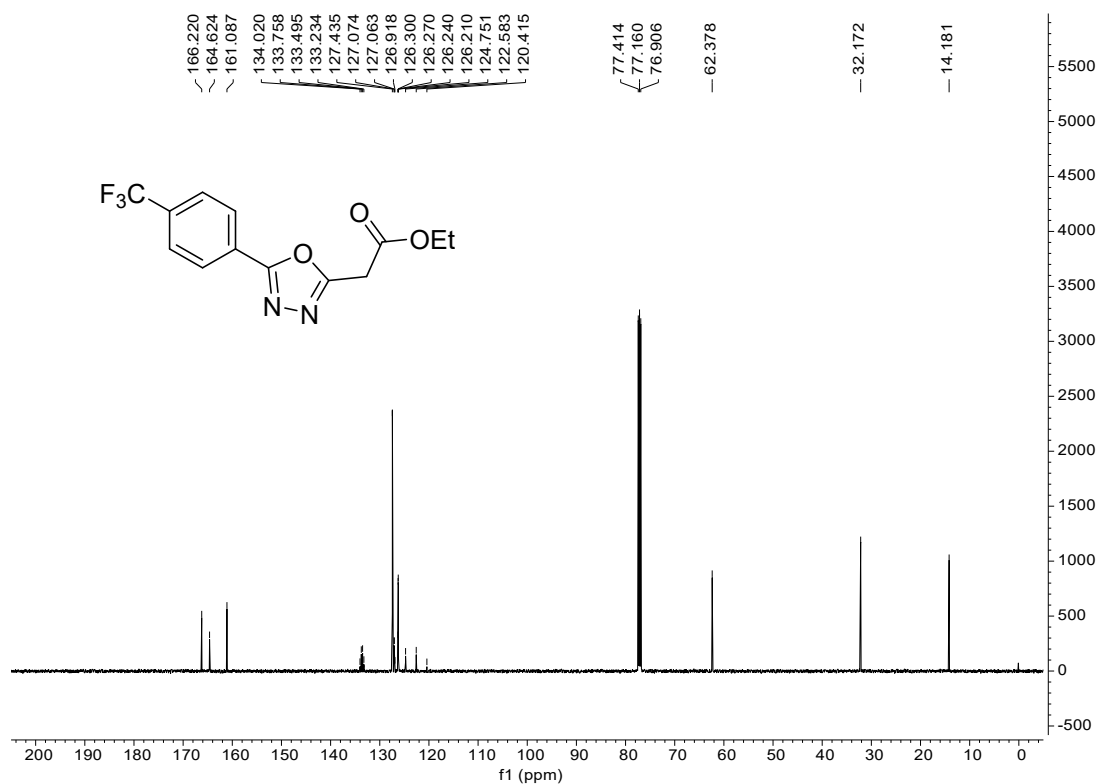

<sup>19</sup>F NMR (376 MHz, CDCl<sub>3</sub>) spectra of **2e**

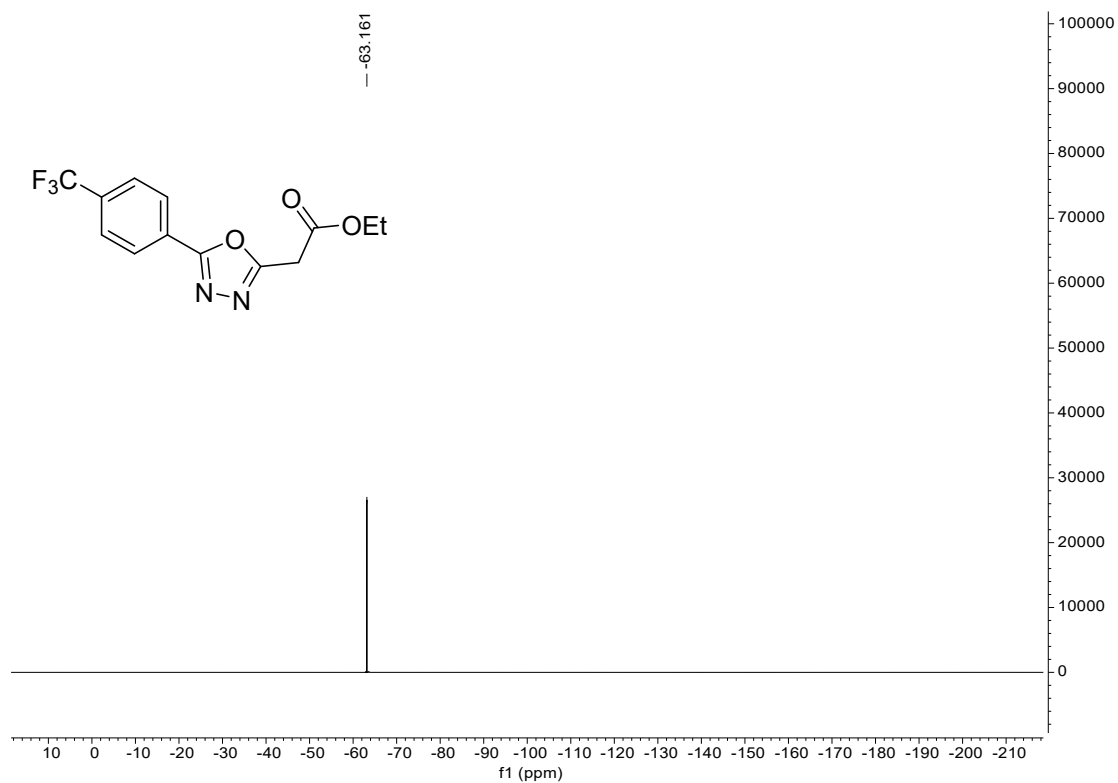

### Ethyl 2-(5-(4-cyanophenyl)-1,3,4-oxadiazol-2-yl)acetate (2f)

<sup>1</sup>H NMR (500 MHz, CDCl<sub>3</sub>) spectra of 2f

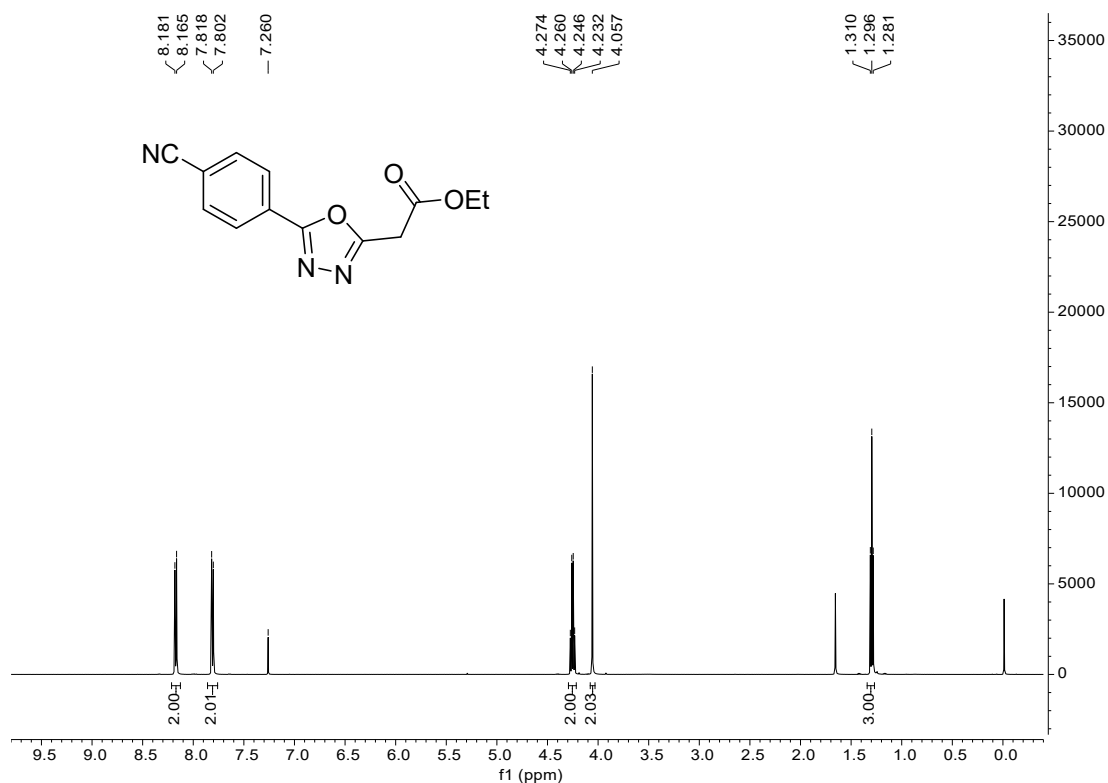

<sup>13</sup>C NMR (125 MHz, CDCl<sub>3</sub>) spectra of 2f

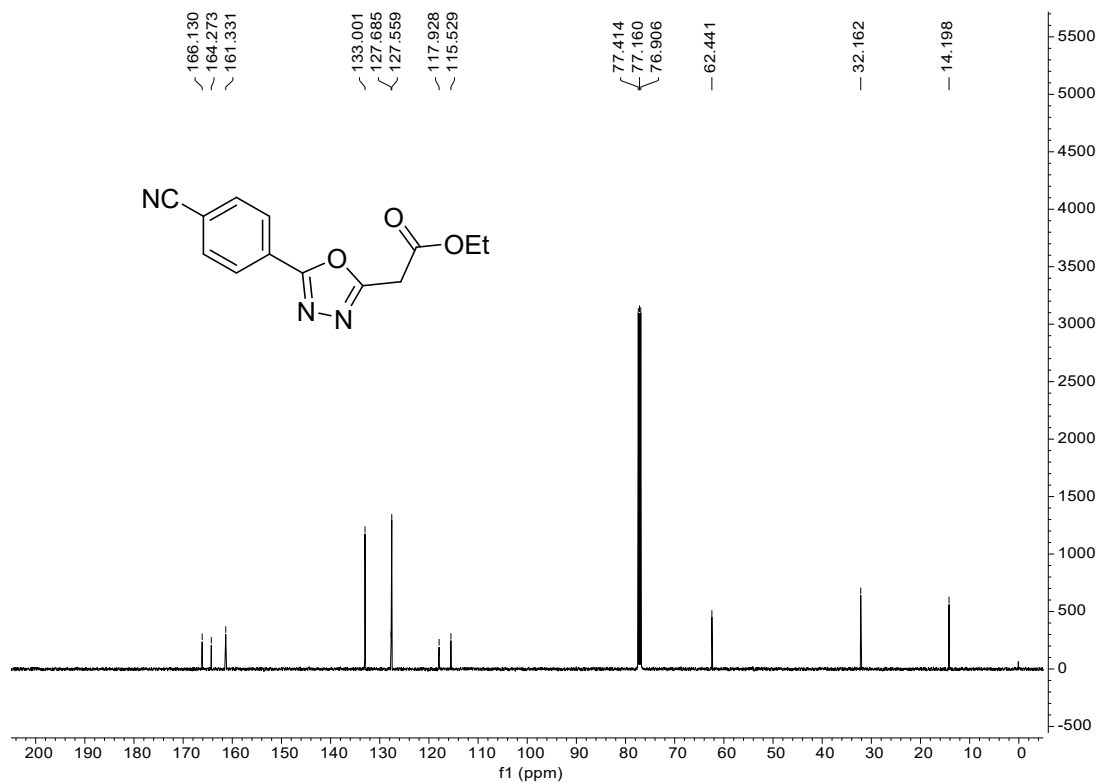



# Ethyl 2-(5-(2-methoxyphenyl)-1,3,4-oxadiazol-2-yl)acetate (2g)

<sup>1</sup>H NMR (500 MHz, CDCl<sub>3</sub>) spectra of 2g

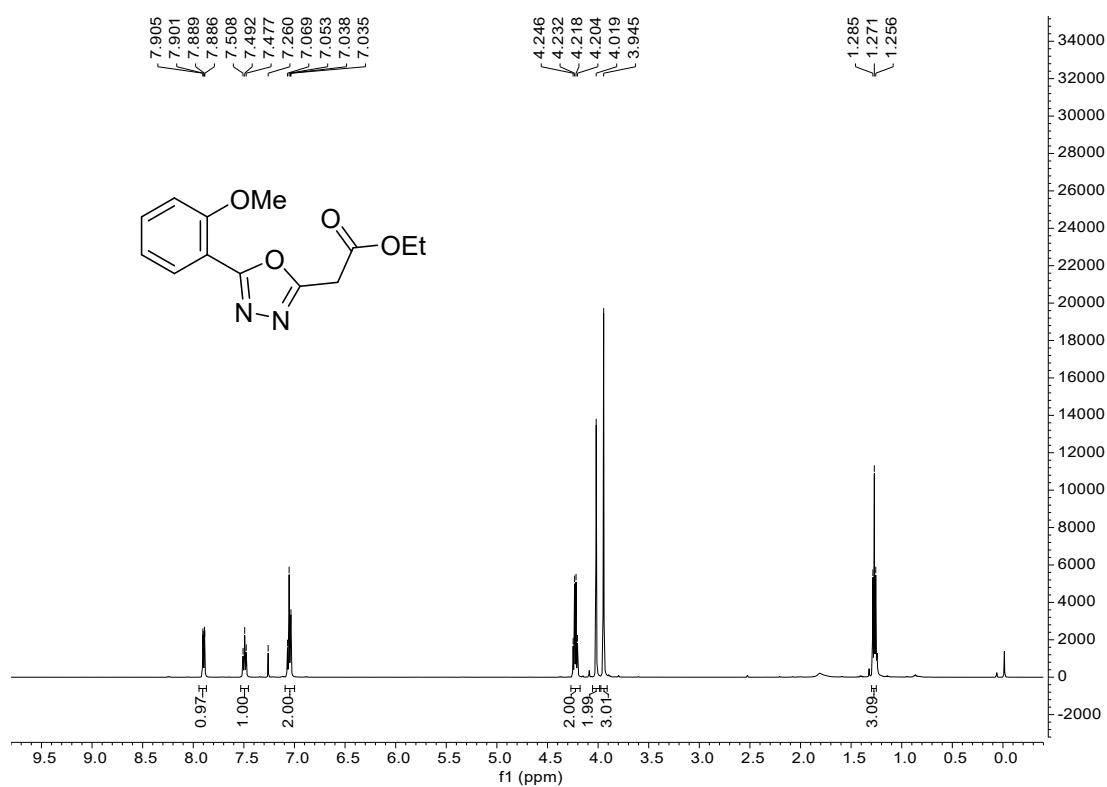

<sup>13</sup>C NMR (125 MHz, CDCl<sub>3</sub>) spectra of 2g

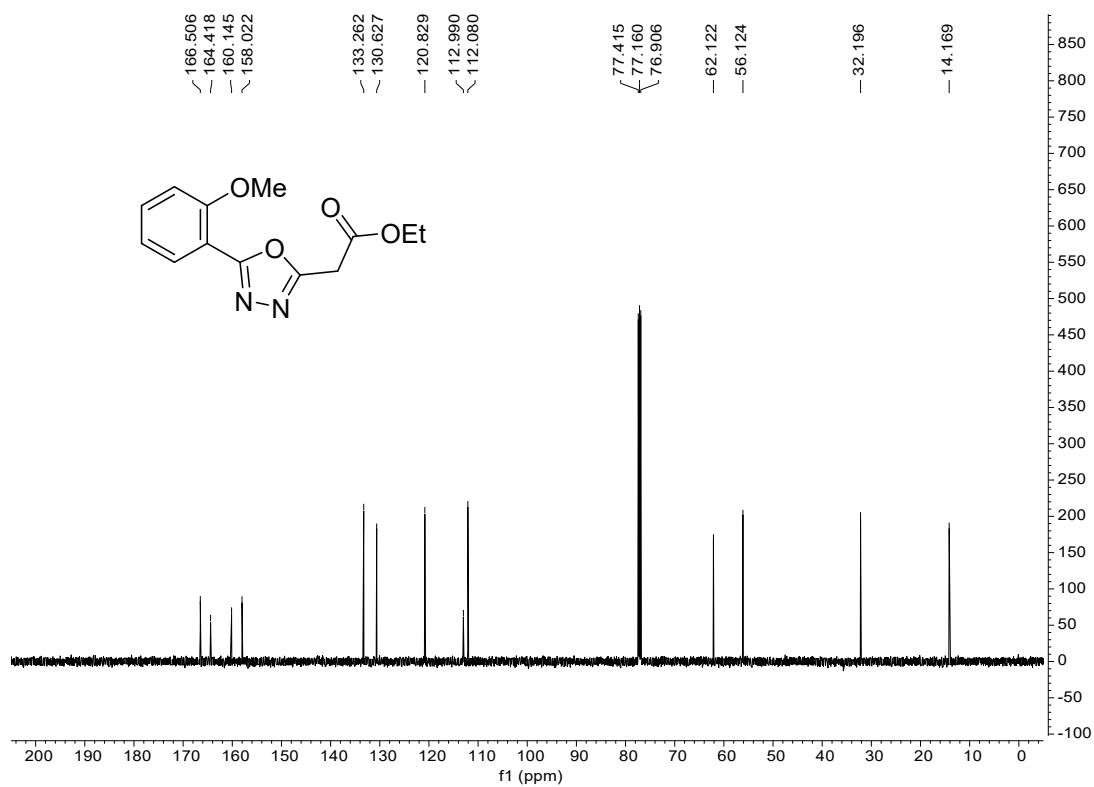

### Ethyl 2-(5-(3-fluorophenyl)-1,3,4-oxadiazol-2-yl)acetate (2h)

<sup>1</sup>H NMR (500 MHz, CDCl<sub>3</sub>) spectra of 2h

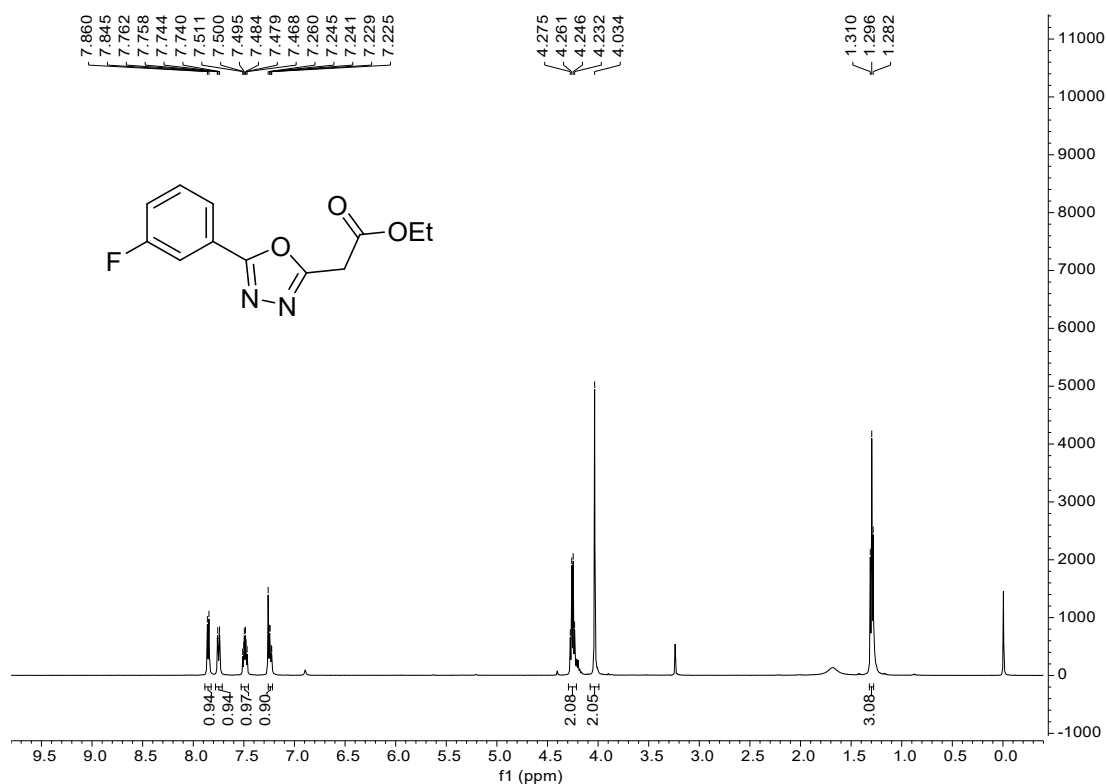

<sup>13</sup>C NMR (125 MHz, CDCl<sub>3</sub>) spectra of 2h

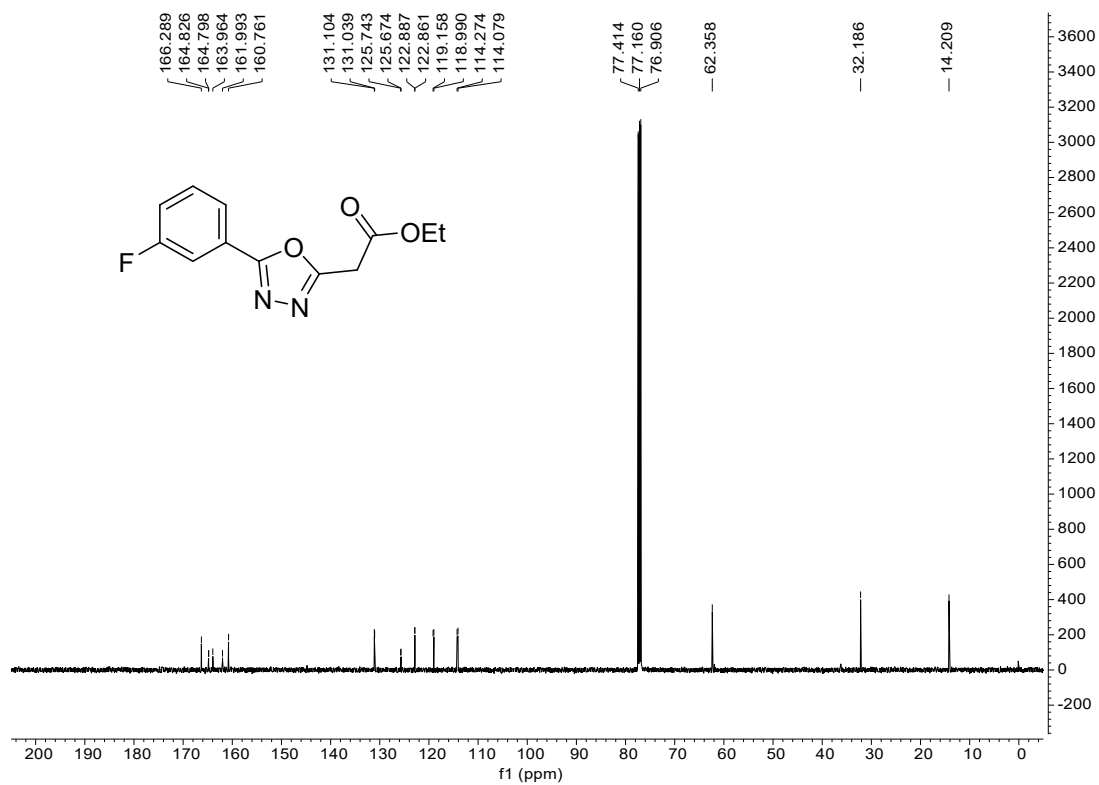

<sup>19</sup>F NMR (376 MHz, CDCl<sub>3</sub>) spectra of **2h**

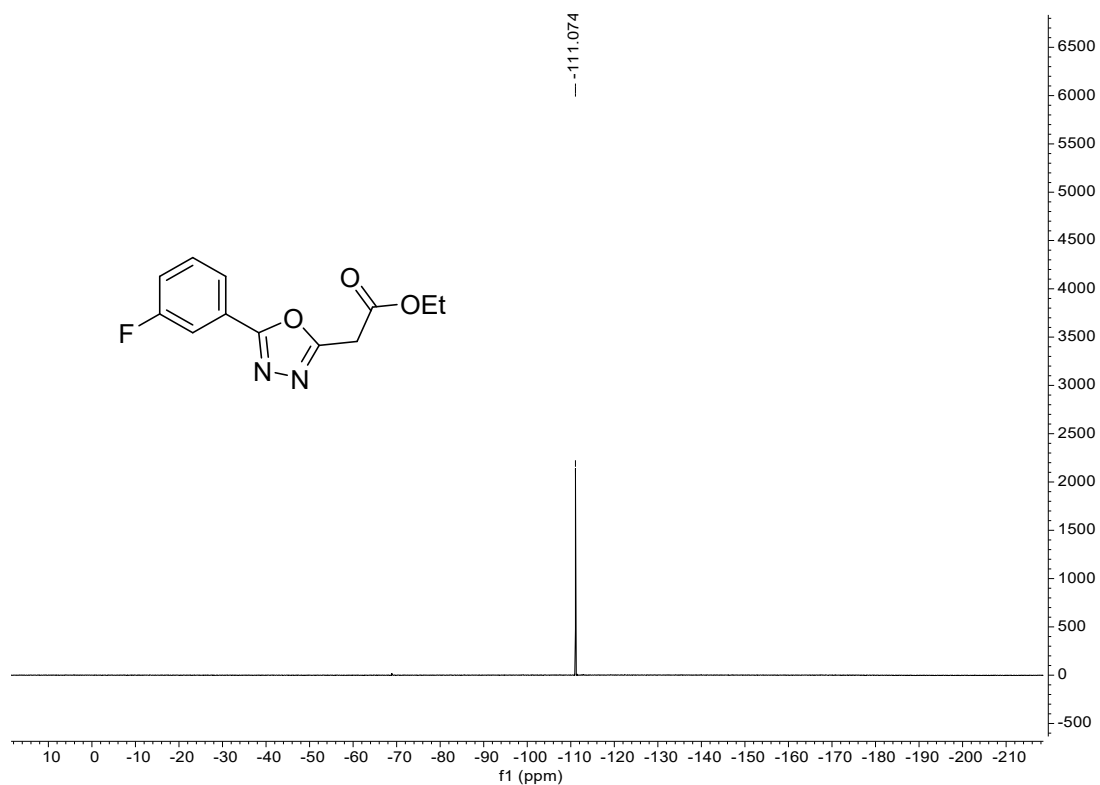

Ethyl 2-(5-(benzo[d][1,3]dioxol-5-yl)-1,3,4-oxadiazol-2-yl)acetate (**2i**)

<sup>1</sup>H NMR (500 MHz, CDCl<sub>3</sub>) spectra of **2i**

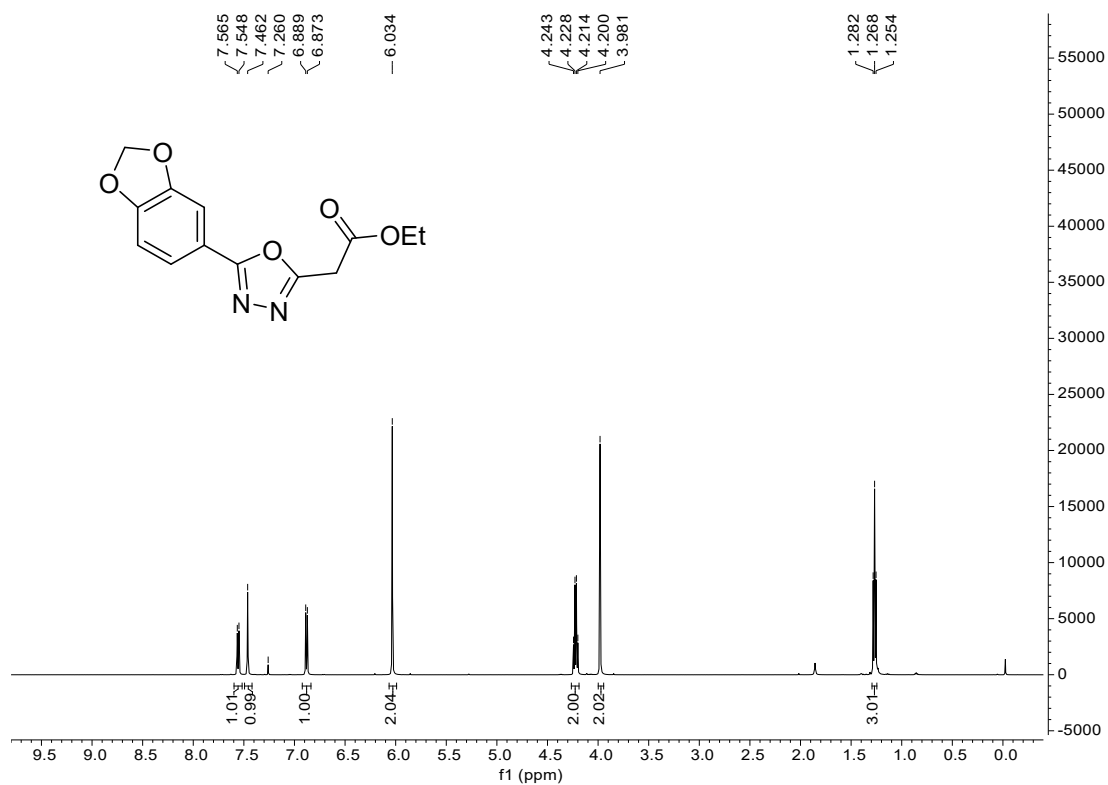

<sup>13</sup>C NMR (125 MHz, CDCl<sub>3</sub>) spectra of **2i**

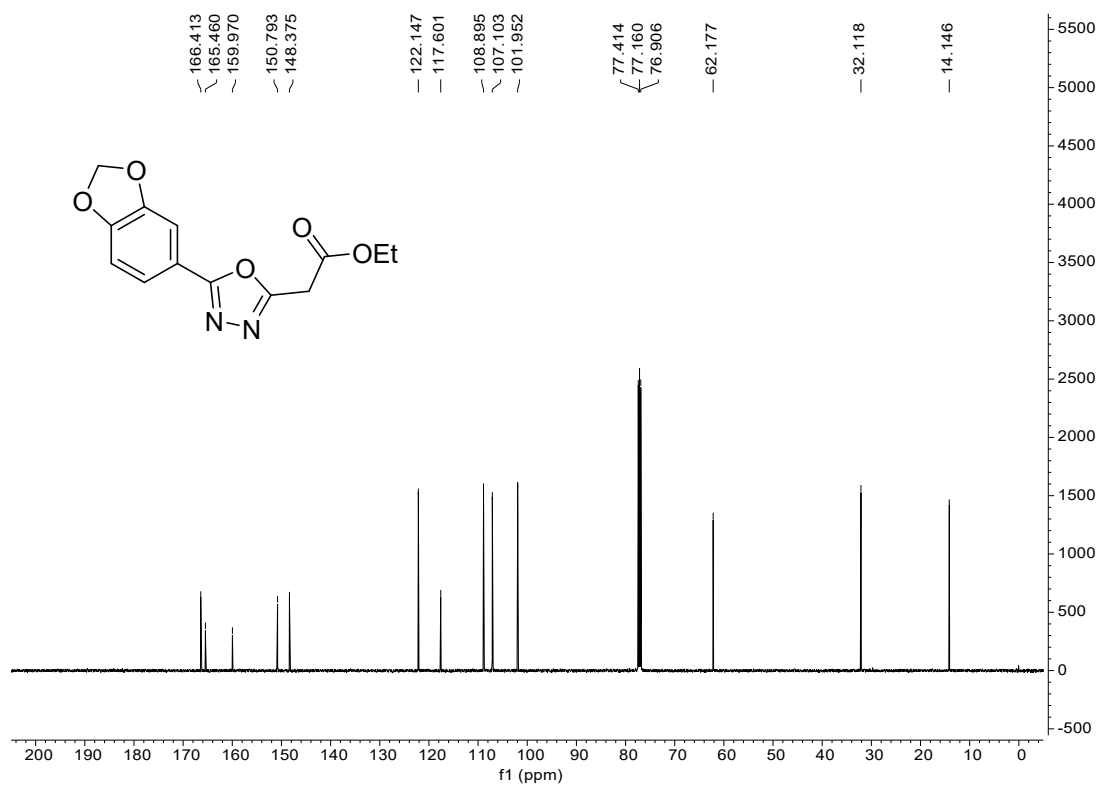

Ethyl 2-(5-(naphthalen-2-yl)-1,3,4-oxadiazol-2-yl)acetate (**2j**)

<sup>1</sup>H NMR (500 MHz, CDCl<sub>3</sub>) spectra of **2j**

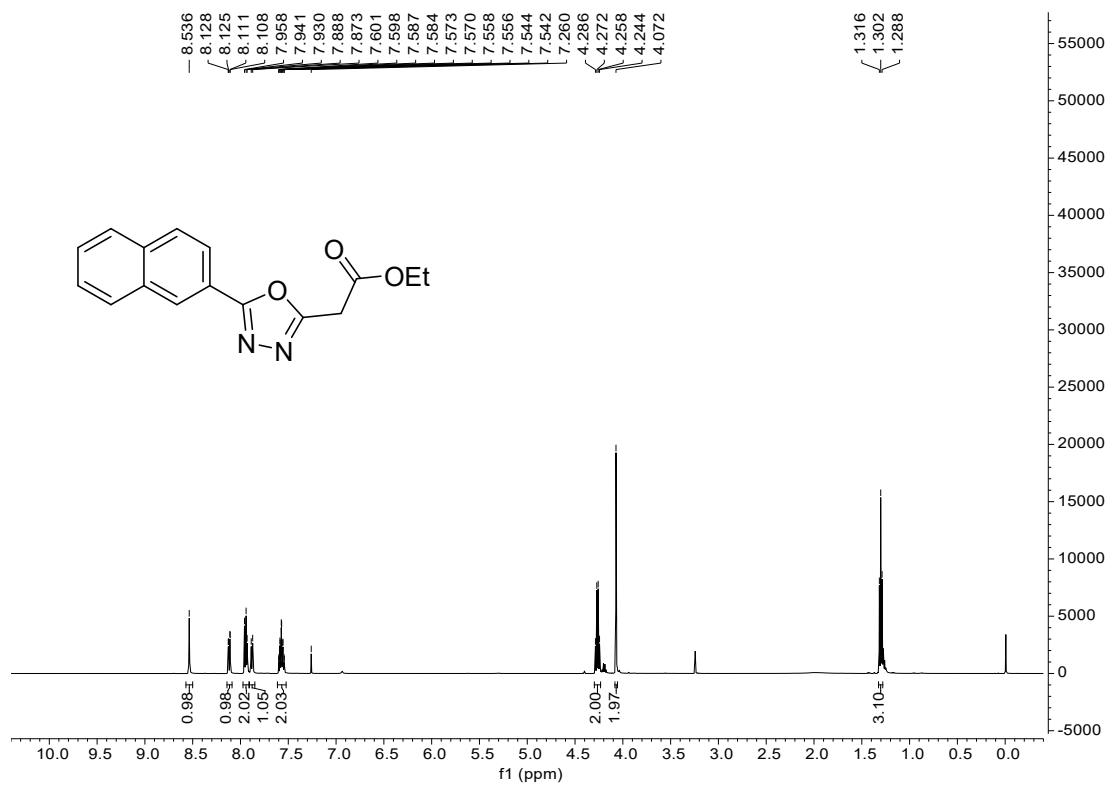

<sup>13</sup>C NMR (125 MHz, CDCl<sub>3</sub>) spectra of **2j**

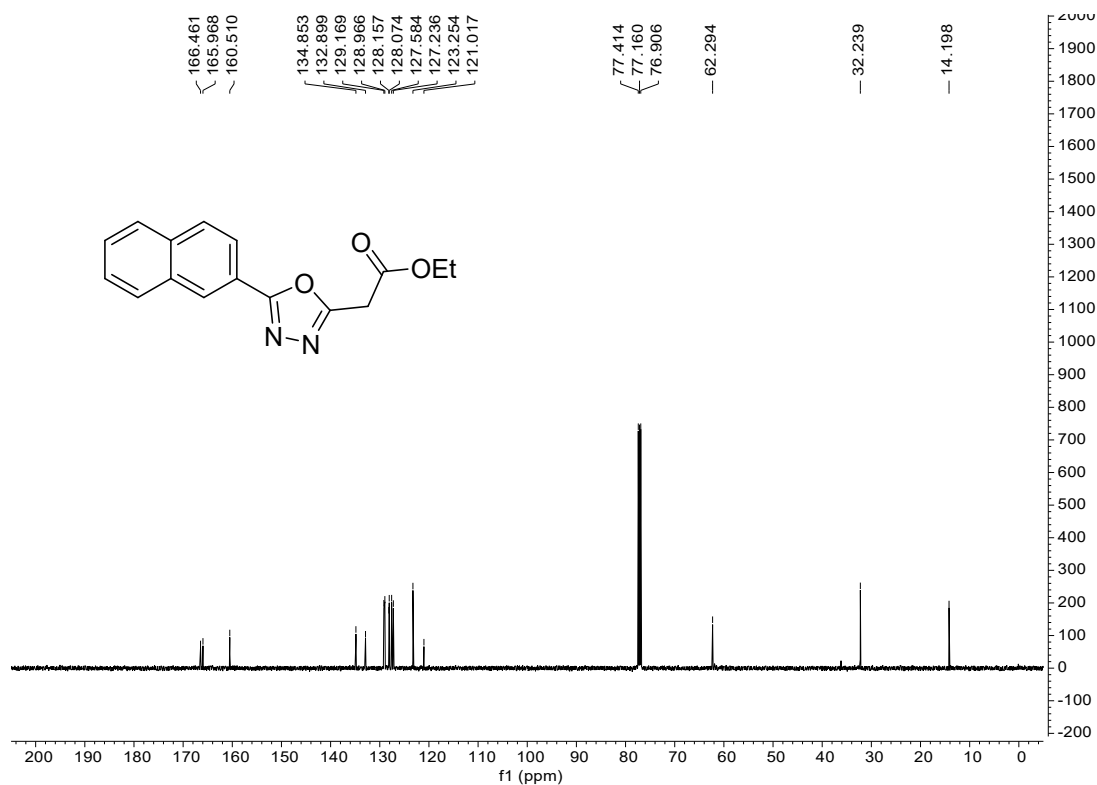

Ethyl 2-(5-(furan-2-yl)-1,3,4-oxadiazol-2-yl)acetate (**2k**)

<sup>1</sup>H NMR (500 MHz, CDCl<sub>3</sub>) spectra of **2k**

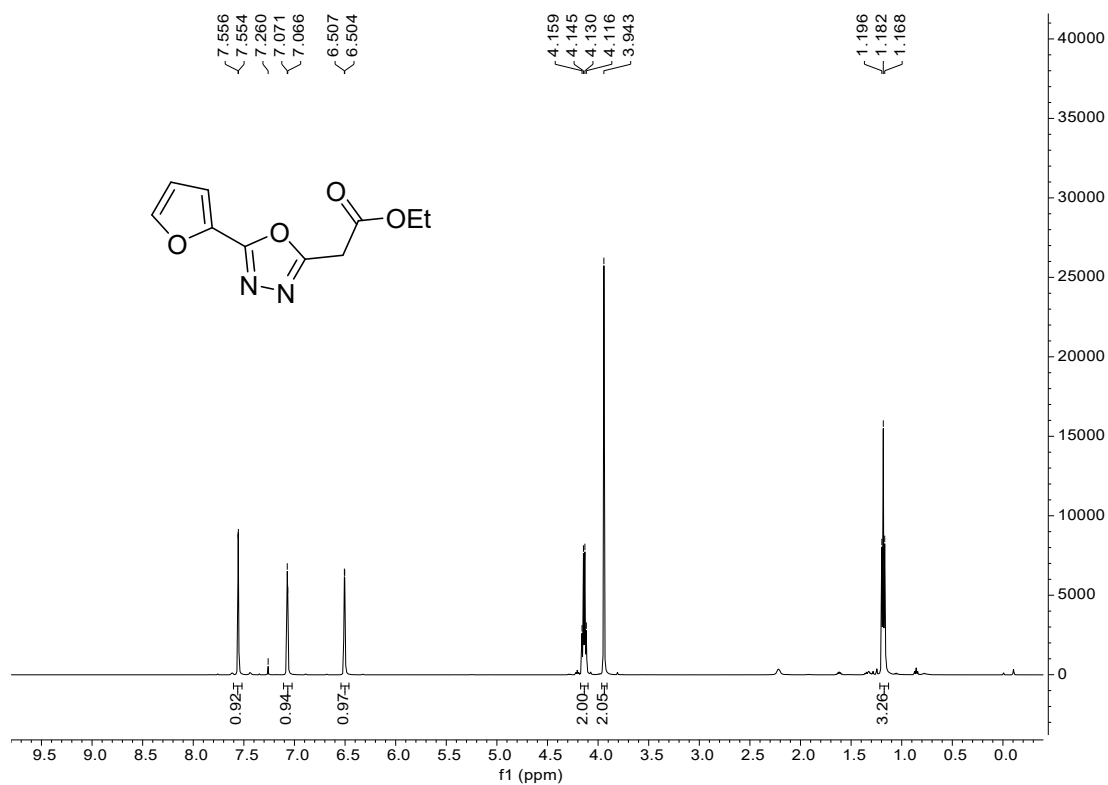

<sup>13</sup>C NMR (125 MHz, CDCl<sub>3</sub>) spectra of **2k**

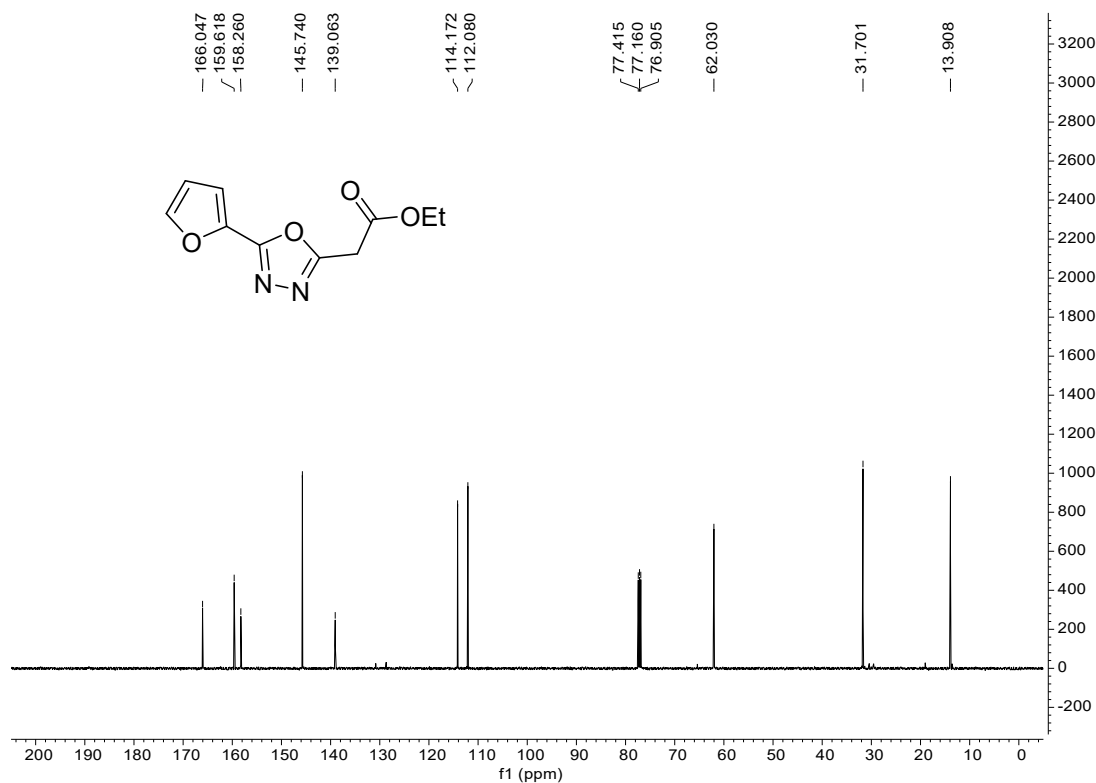

Ethyl 2-(5-(thiophen-2-yl)-1,3,4-oxadiazol-2-yl)acetate (**2l**)

<sup>1</sup>H NMR (500 MHz, CDCl<sub>3</sub>) spectra of **2l**

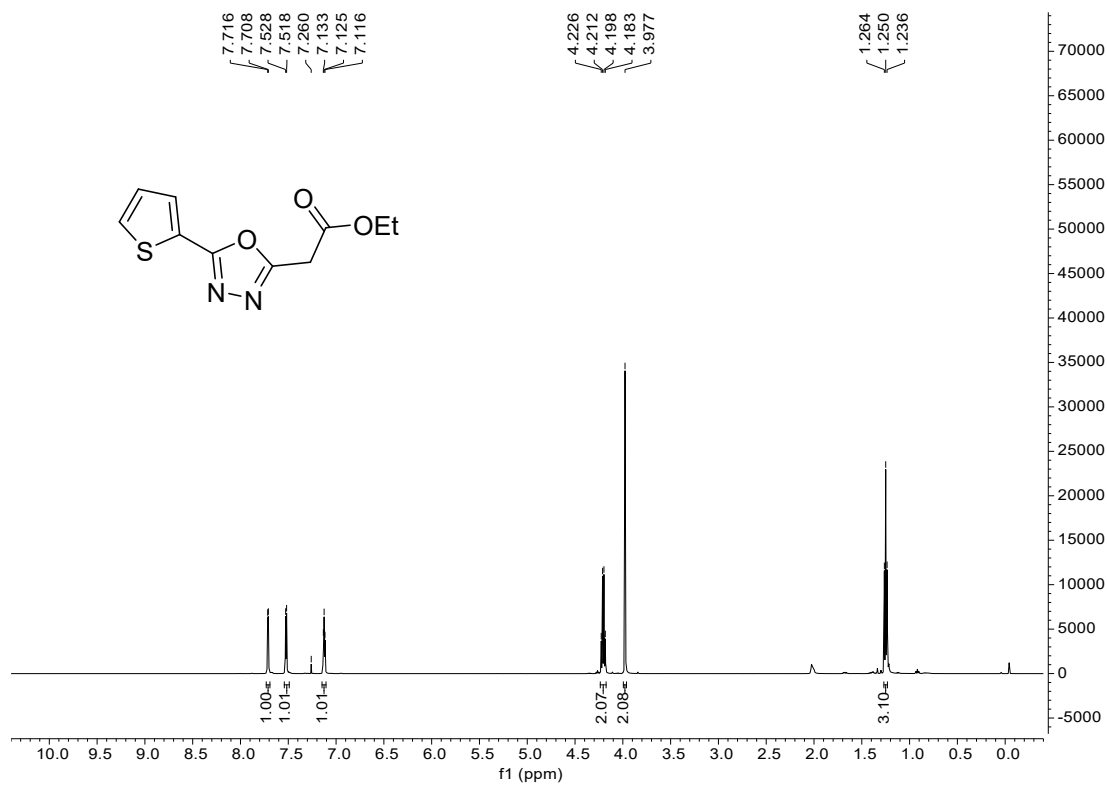

<sup>13</sup>C NMR (125 MHz, CDCl<sub>3</sub>) spectra of **2l**

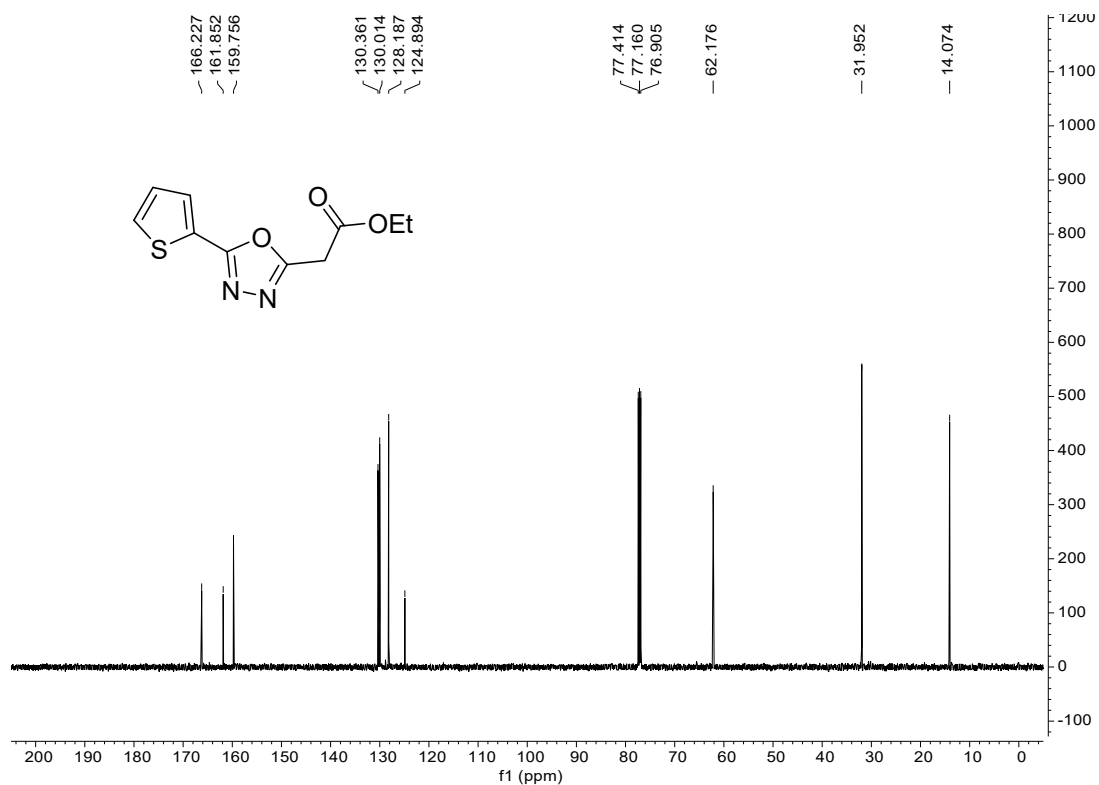

Ethyl 2-(5-(1H-indol-3-yl)-1,3,4-oxadiazol-2-yl)acetate (**2m**)

<sup>1</sup>H NMR (600 MHz, DMSO-*d*<sub>6</sub>) spectra of **2m**

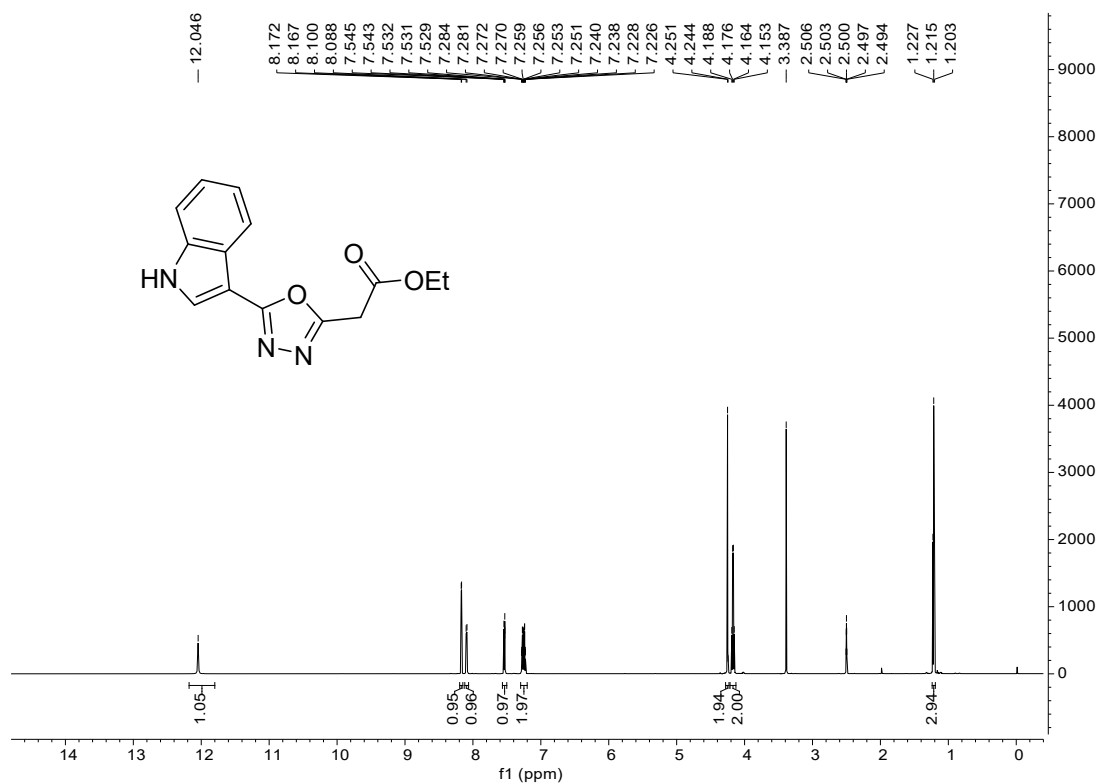

**<sup>13</sup>C NMR (150 MHz, DMSO-*d*<sub>6</sub>) spectra of 2m**

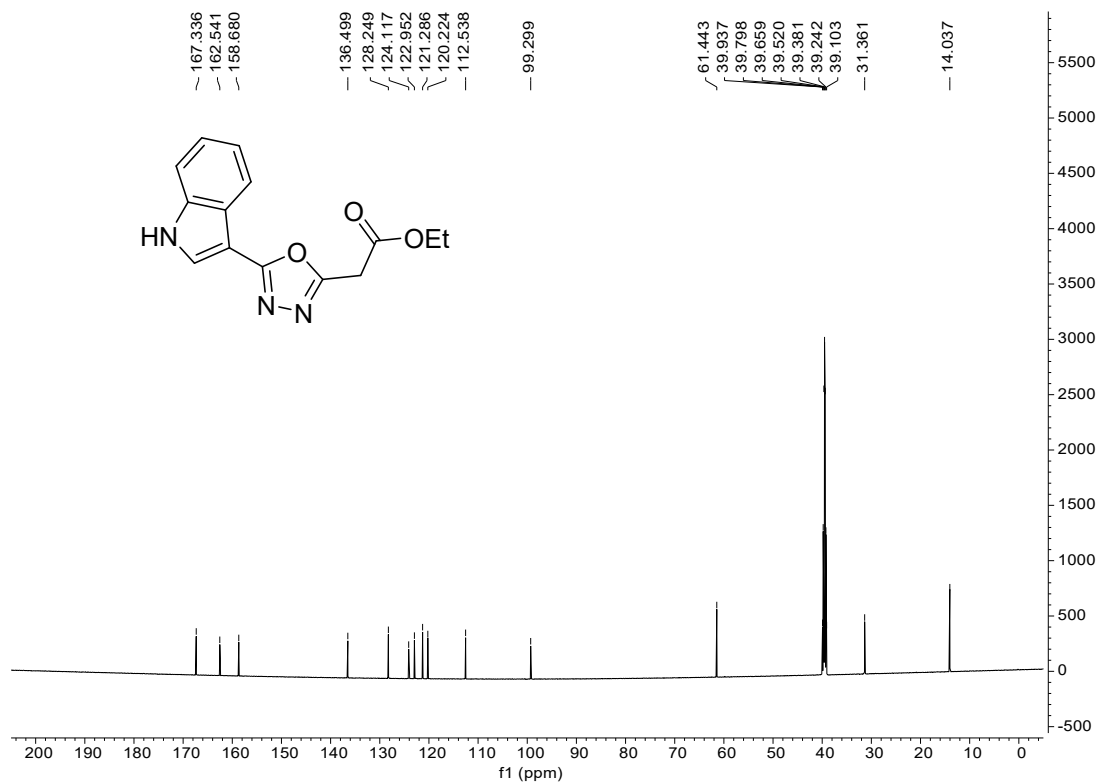

**Ethyl 2-(5-(pyridin-3-yl)-1,3,4-oxadiazol-2-yl)acetate (2n)**

**<sup>1</sup>H NMR (500 MHz, CDCl<sub>3</sub>) spectra of 2n**

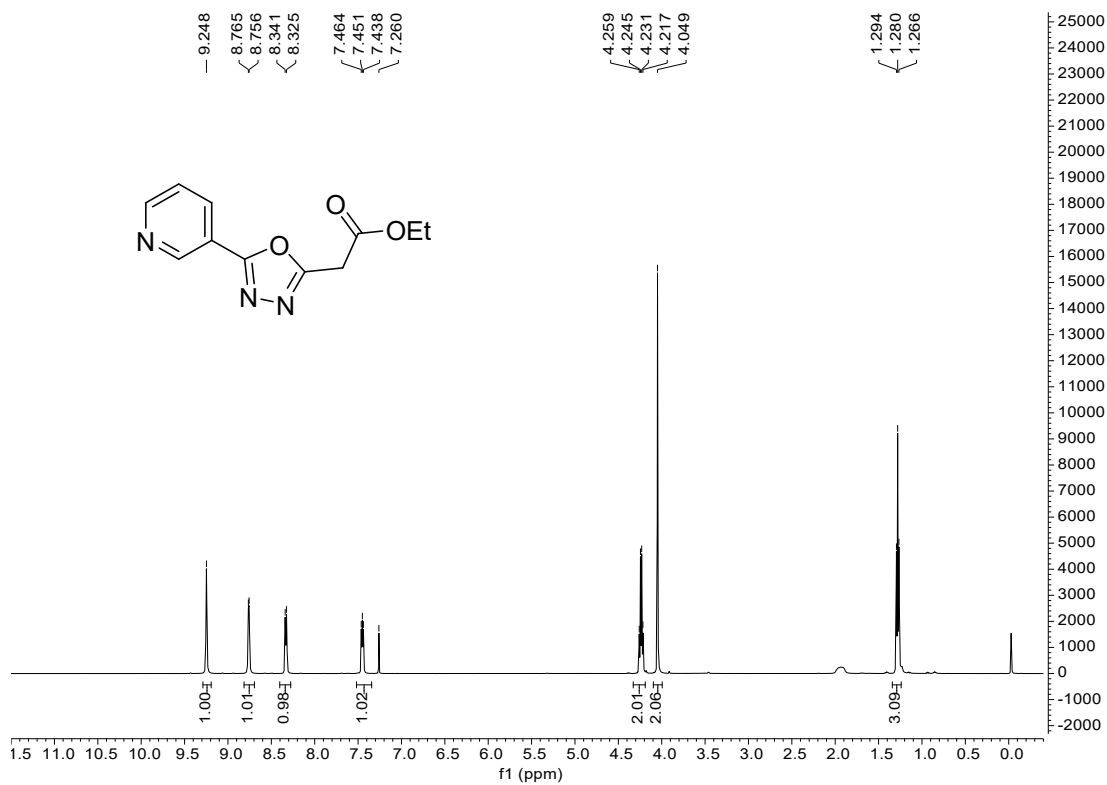



<sup>13</sup>C NMR (125 MHz, CDCl<sub>3</sub>) spectra of **2n**

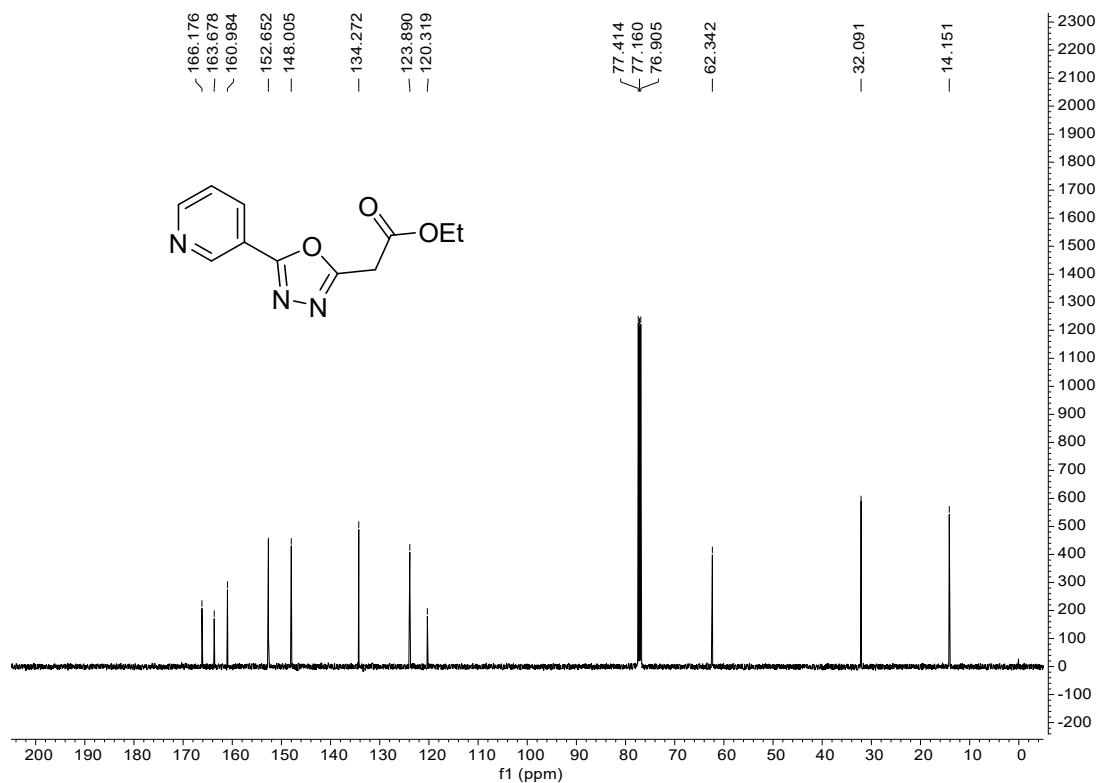

Ethyl 2-(5-pyrazin-2-yl)-1,3,4-oxadiazol-2-ylacetate (**2o**)

<sup>1</sup>H NMR (500 MHz, CDCl<sub>3</sub>) spectra of **2o**

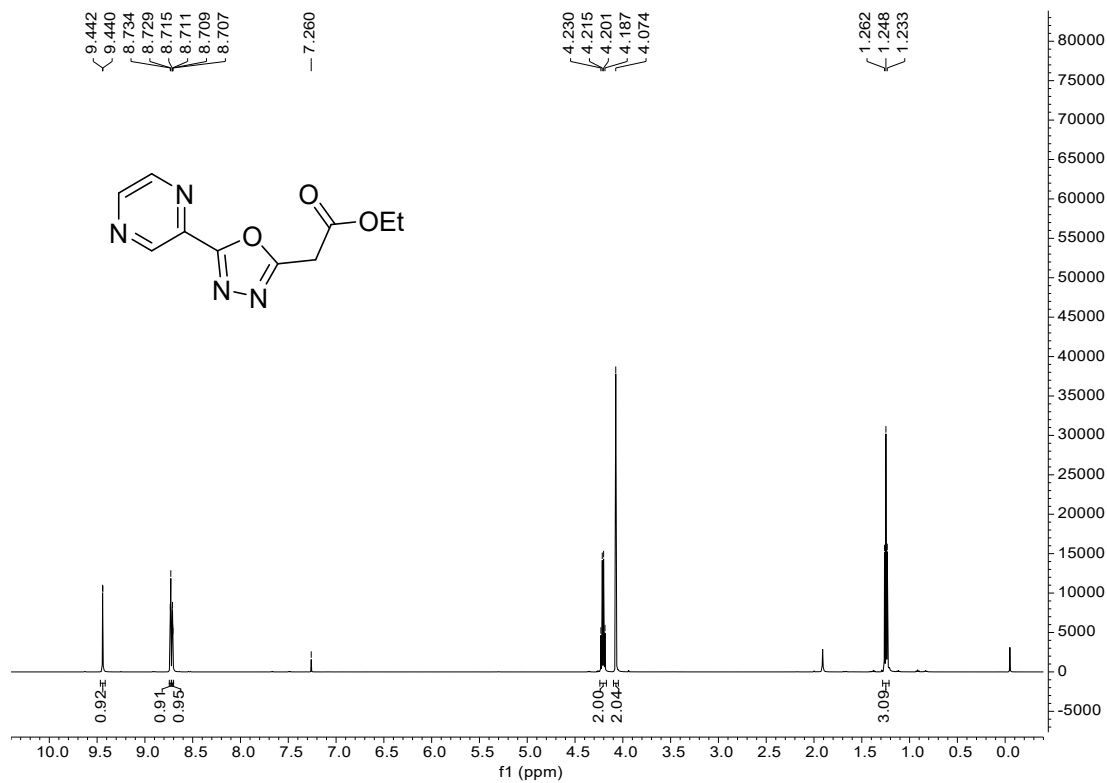

<sup>13</sup>C NMR (125 MHz, CDCl<sub>3</sub>) spectra of **2o**

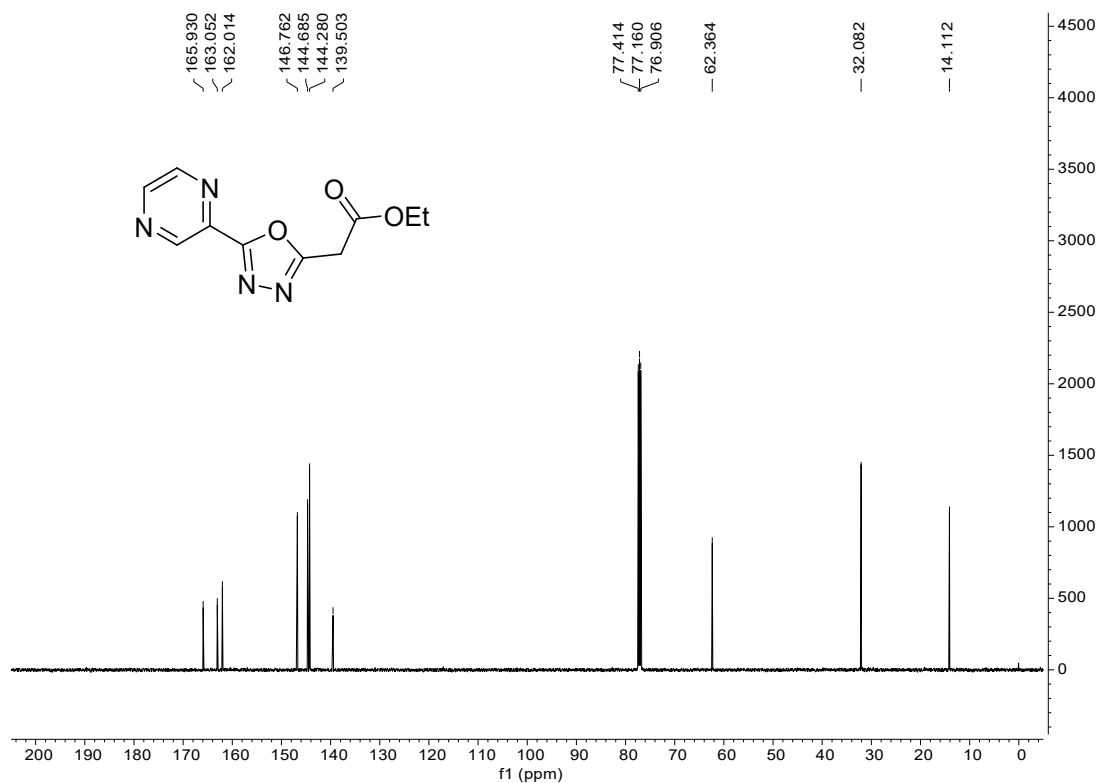

Ethyl 2-(5-methyl-1,3,4-oxadiazol-2-yl)acetate(**2p**)

<sup>1</sup>H NMR (600 MHz, CDCl<sub>3</sub>) spectra of **2p**

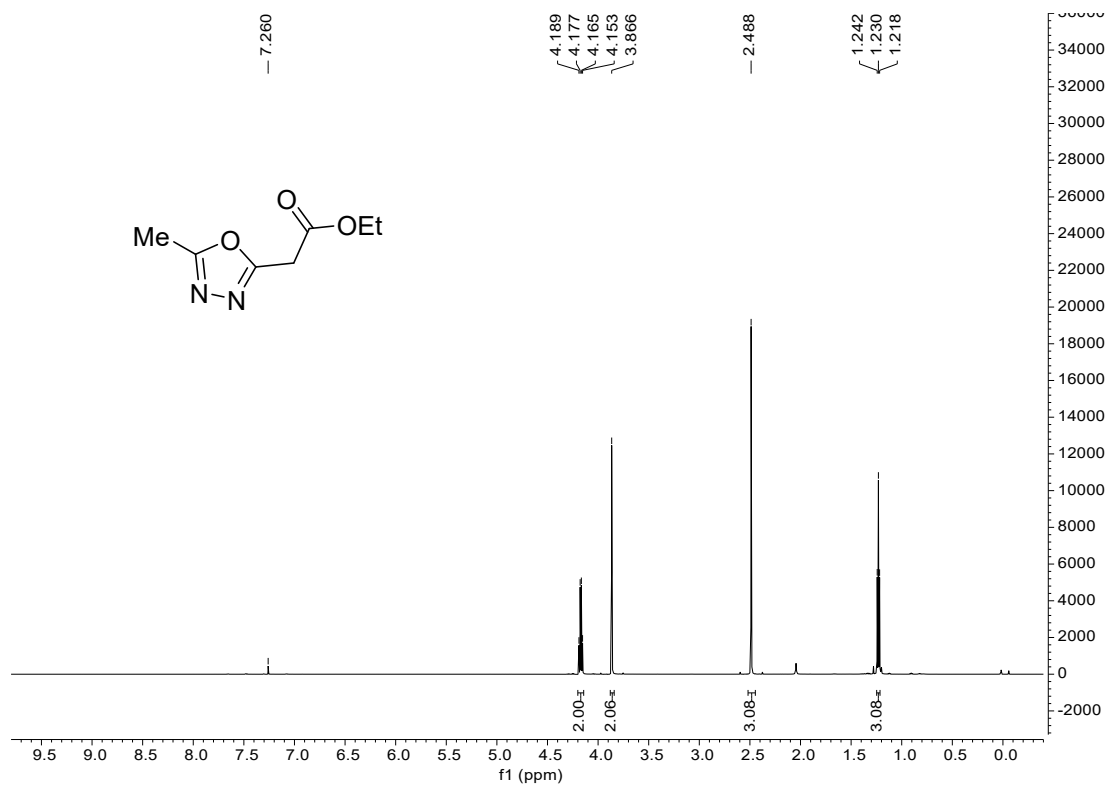

<sup>13</sup>C NMR (150 MHz, CDCl<sub>3</sub>) spectra of **2p**

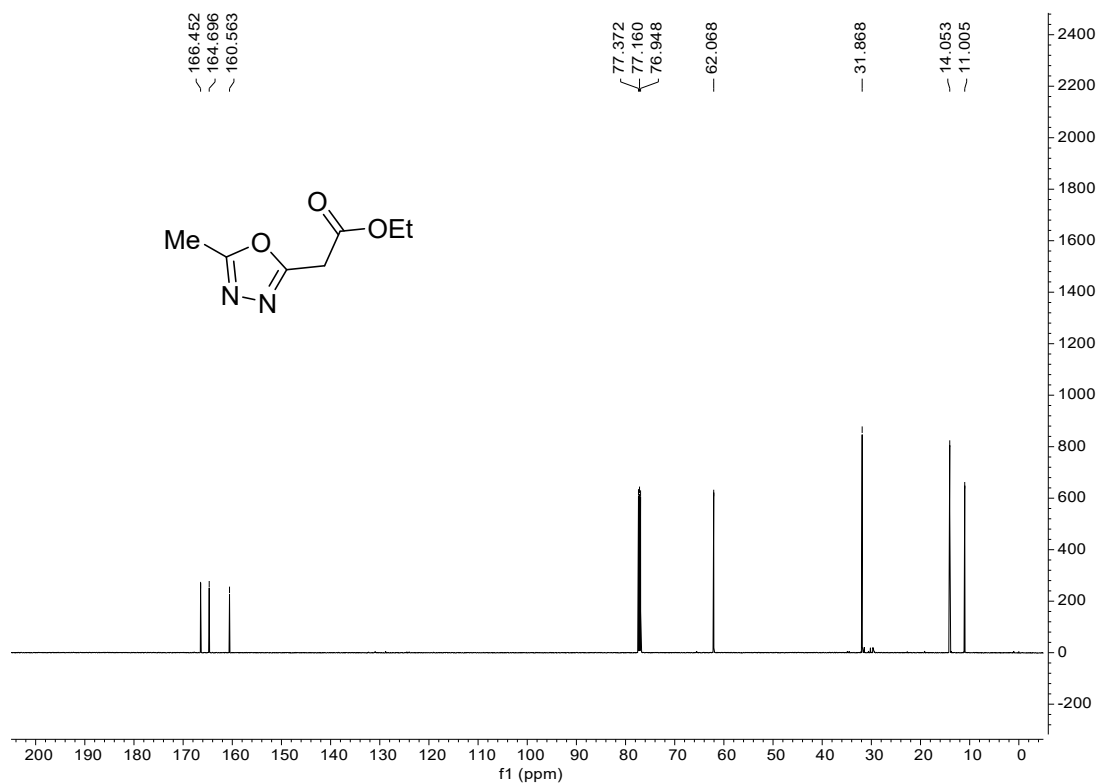

Ethyl 2-(5-propyl-1,3,4-oxadiazol-2-yl)acetate (**2q**)

<sup>1</sup>H NMR (500 MHz, CDCl<sub>3</sub>) spectra of **2q**

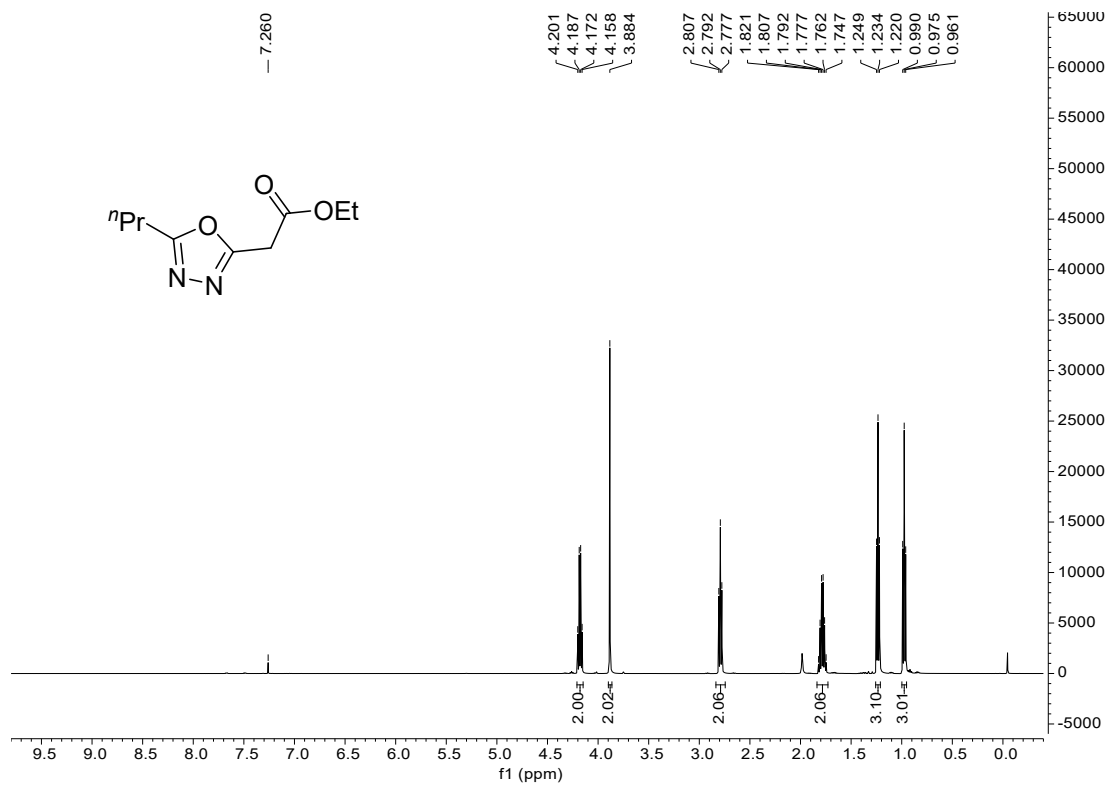

<sup>13</sup>C NMR (125 MHz, CDCl<sub>3</sub>) spectra of **2q**

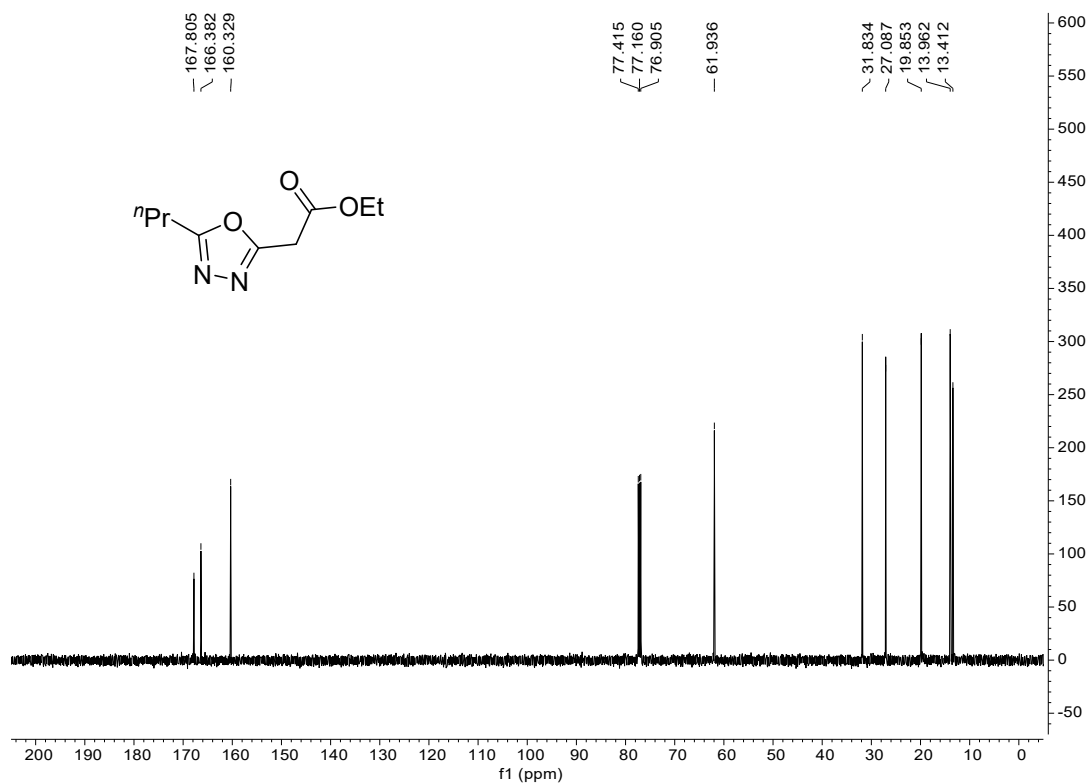

Ethyl 2-(5-benzyl-1,3,4-oxadiazol-2-yl)acetate (**2r**)

<sup>1</sup>H NMR (500 MHz, CDCl<sub>3</sub>) spectra of **2r**

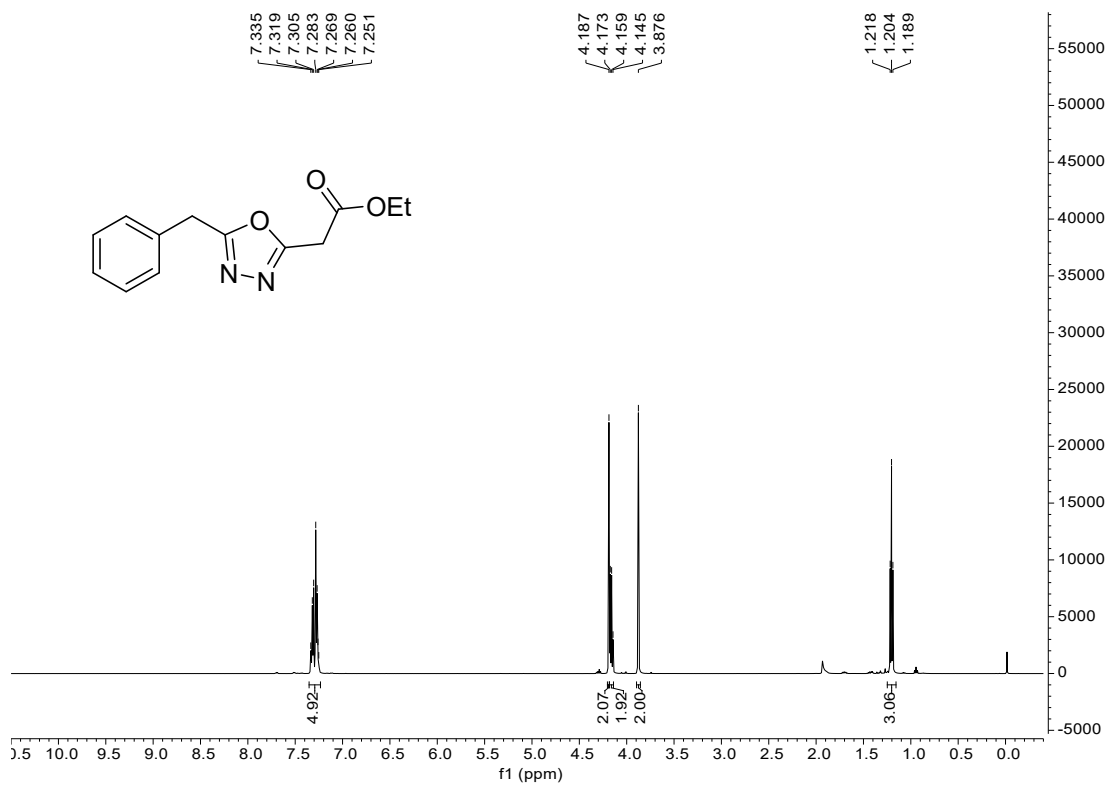

<sup>13</sup>C NMR (125 MHz, CDCl<sub>3</sub>) spectra of **2r**

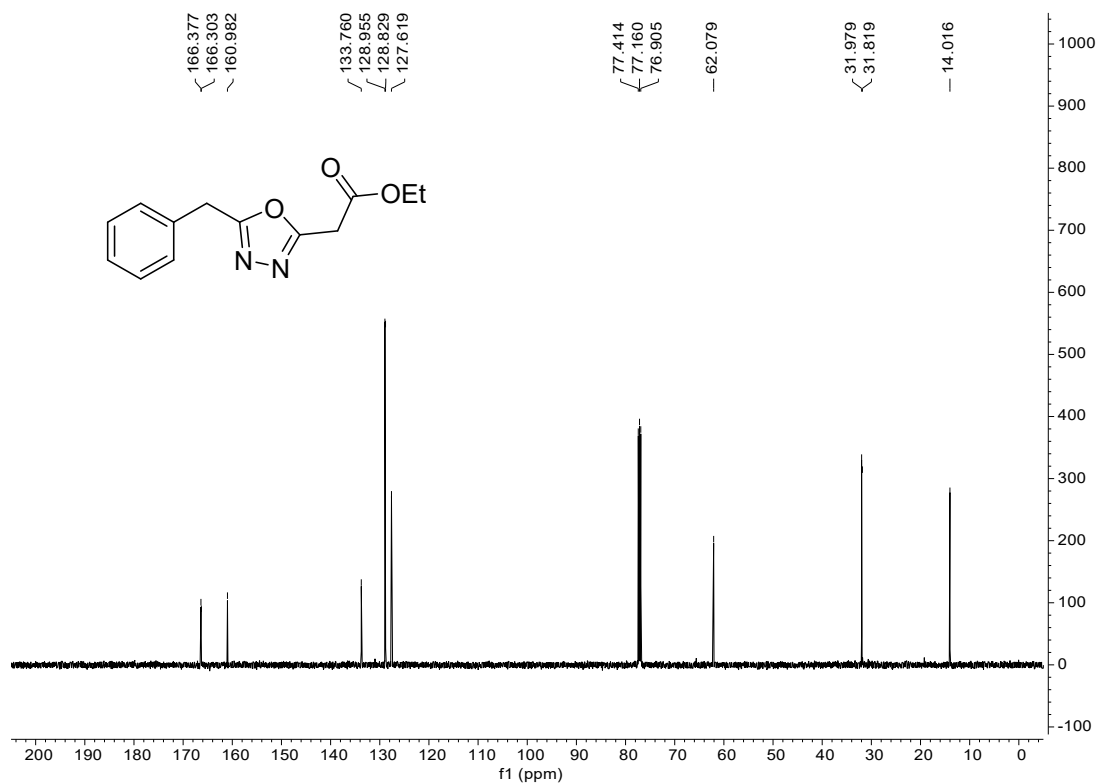

Ethyl 2-(5-(tert-butyl)-1,3,4-oxadiazol-2-yl)acetate (**2s**)

<sup>1</sup>H NMR (500 MHz, CDCl<sub>3</sub>) spectra of **2s**

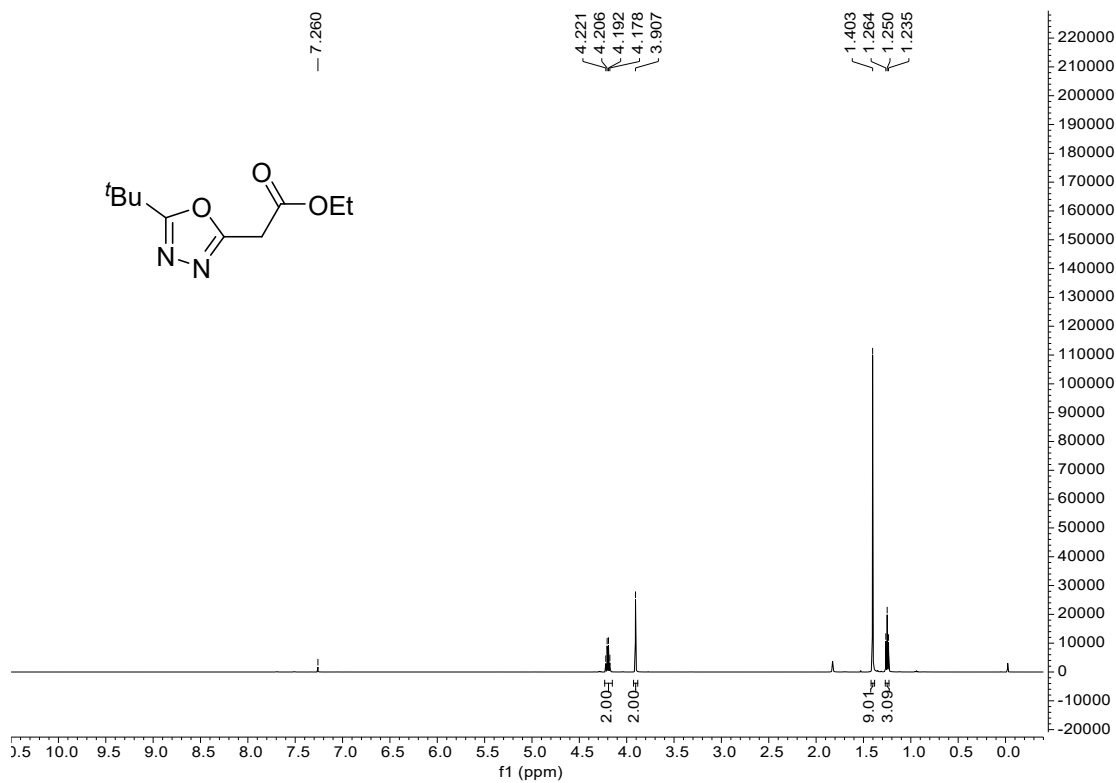

<sup>13</sup>C NMR (125 MHz, CDCl<sub>3</sub>) spectra of spectra of **2s**

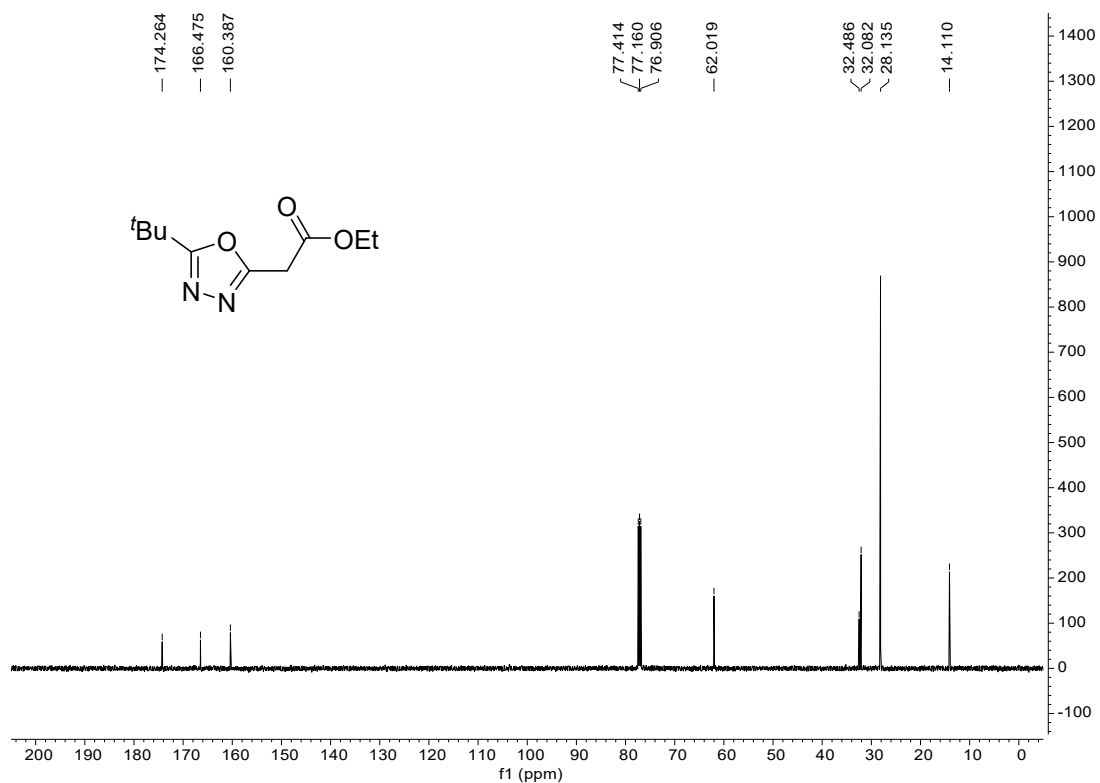

Ethyl 2-(5-(cyanomethyl)-1,3,4-oxadiazol-2-yl)acetate (**2t**)

<sup>1</sup>H NMR (500 MHz, CDCl<sub>3</sub>) spectra of **2t**

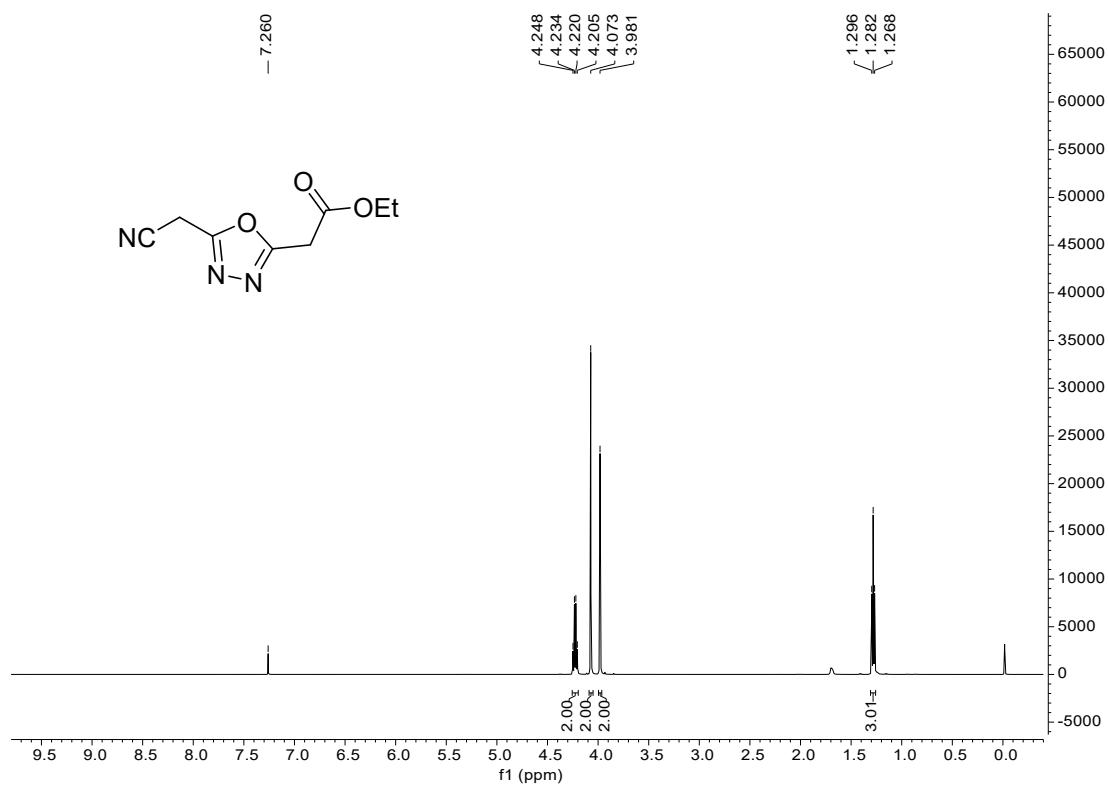

<sup>13</sup>C NMR (125 MHz, CDCl<sub>3</sub>) spectra of spectra of **2t**

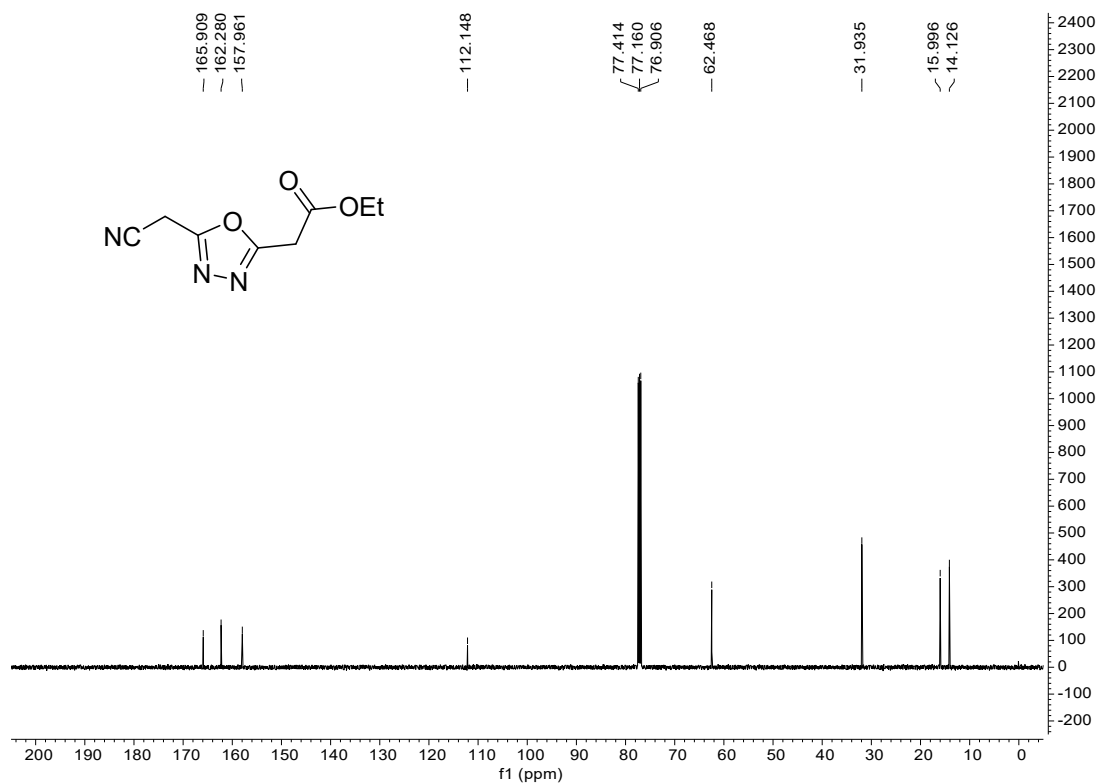

Ethyl 2-(5-ethoxy-1,3,4-oxadiazol-2-yl)acetate (**2u**)

<sup>1</sup>H NMR (500 MHz, CDCl<sub>3</sub>) spectra of **2u**

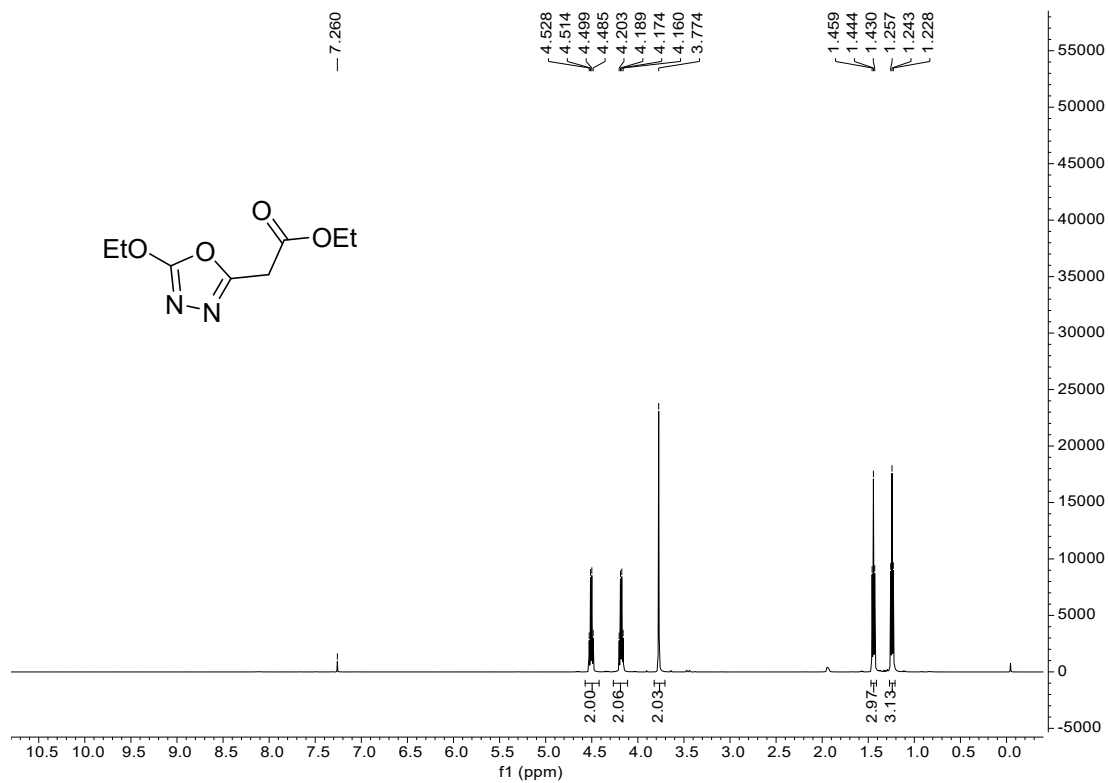

<sup>13</sup>C NMR (125 MHz, CDCl<sub>3</sub>) spectra of **2u**

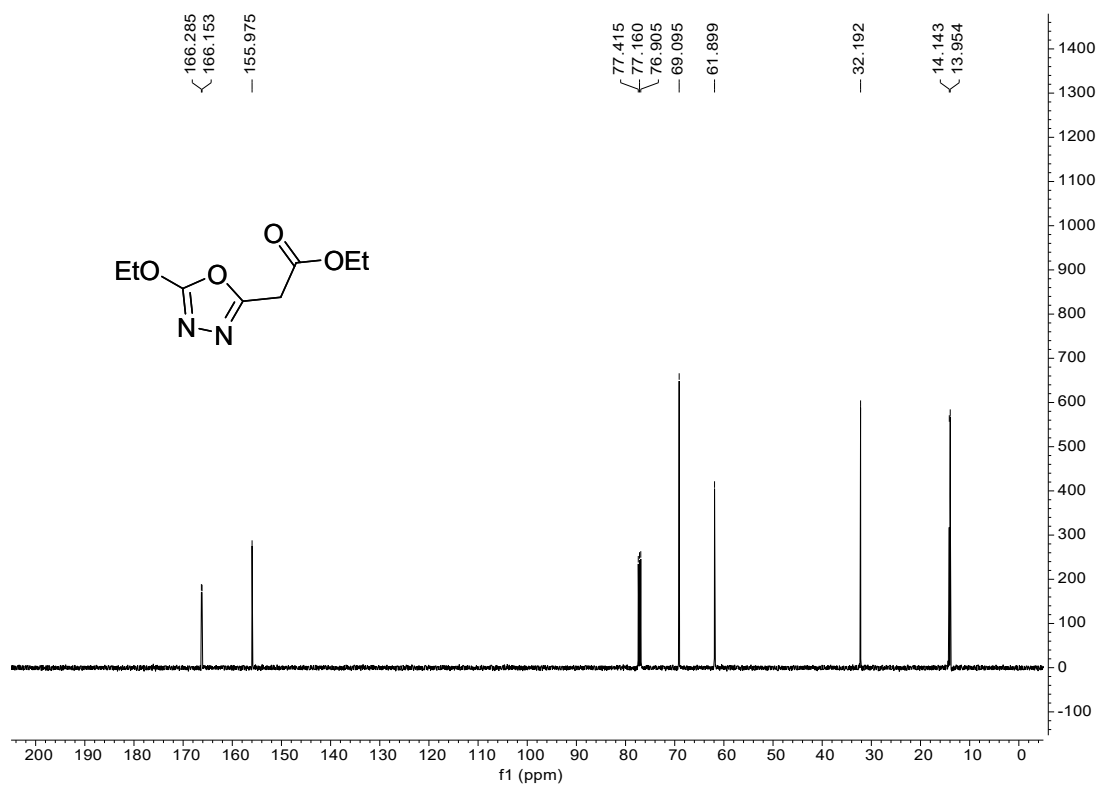

Ethyl 2-(5-(4-(N,N-dipropylsulfamoyl)phenyl)-1,3,4-oxadiazol-2-yl)acetate (**2v**)

<sup>1</sup>H NMR (500 MHz, CDCl<sub>3</sub>) spectra of **2v**

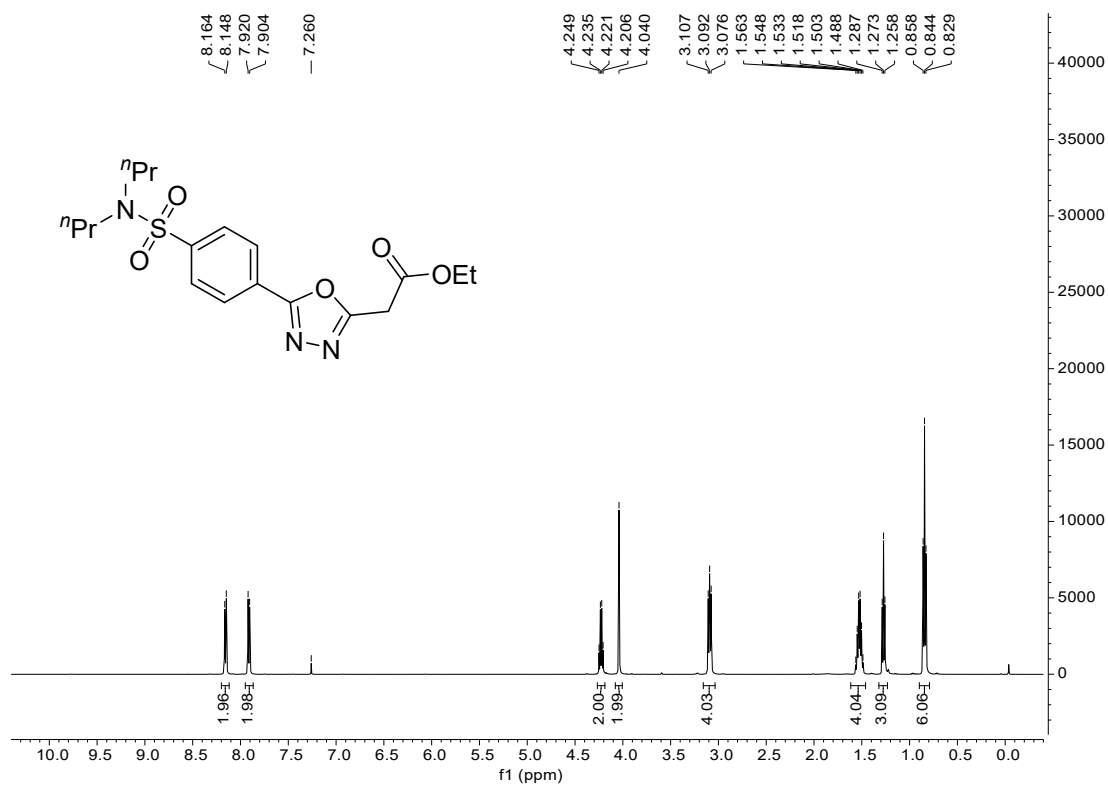



$^{13}\text{C}$  NMR (125 MHz,  $\text{CDCl}_3$ ) spectra of **2v**

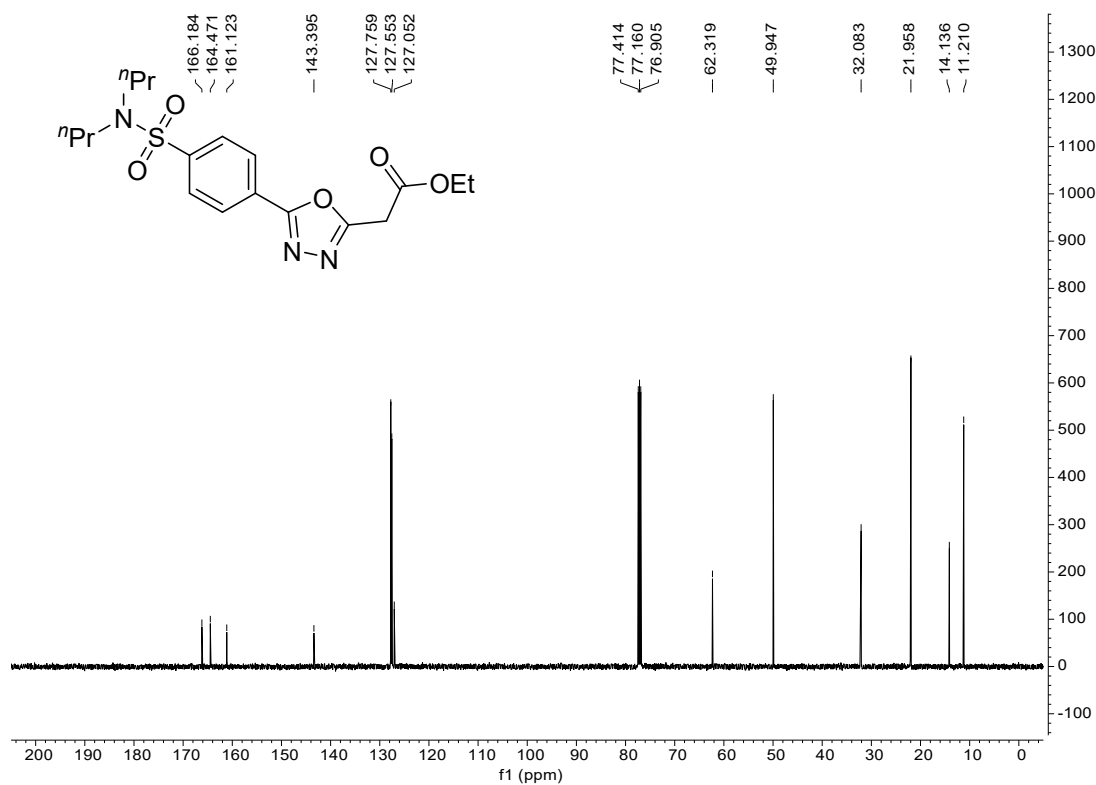

Ethyl 2-(5-(2-(3-cyano-4-isobutoxyphenyl)-4-methylthiazol-5-yl)-1,3,4-oxadiazol-2-yl)acetate (**2w**)

$^1\text{H}$  NMR (500 MHz,  $\text{CDCl}_3$ ) spectra of **2w**

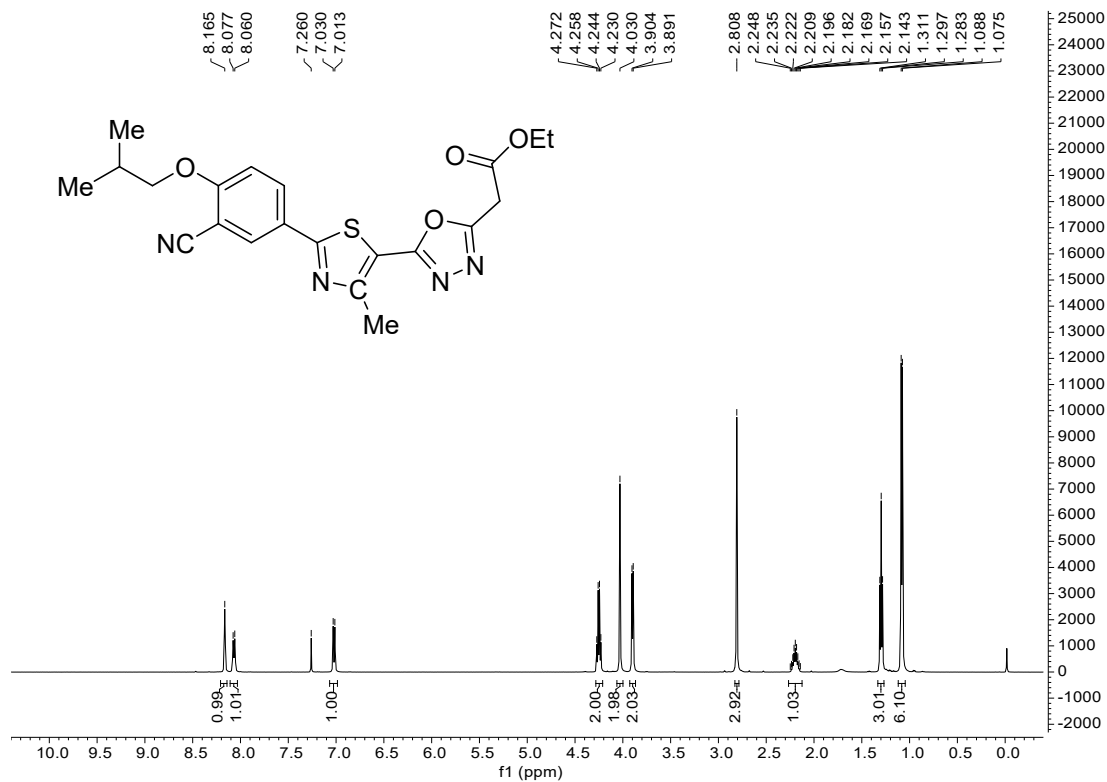

<sup>13</sup>C NMR (125 MHz, CDCl<sub>3</sub>) spectra of **2w**

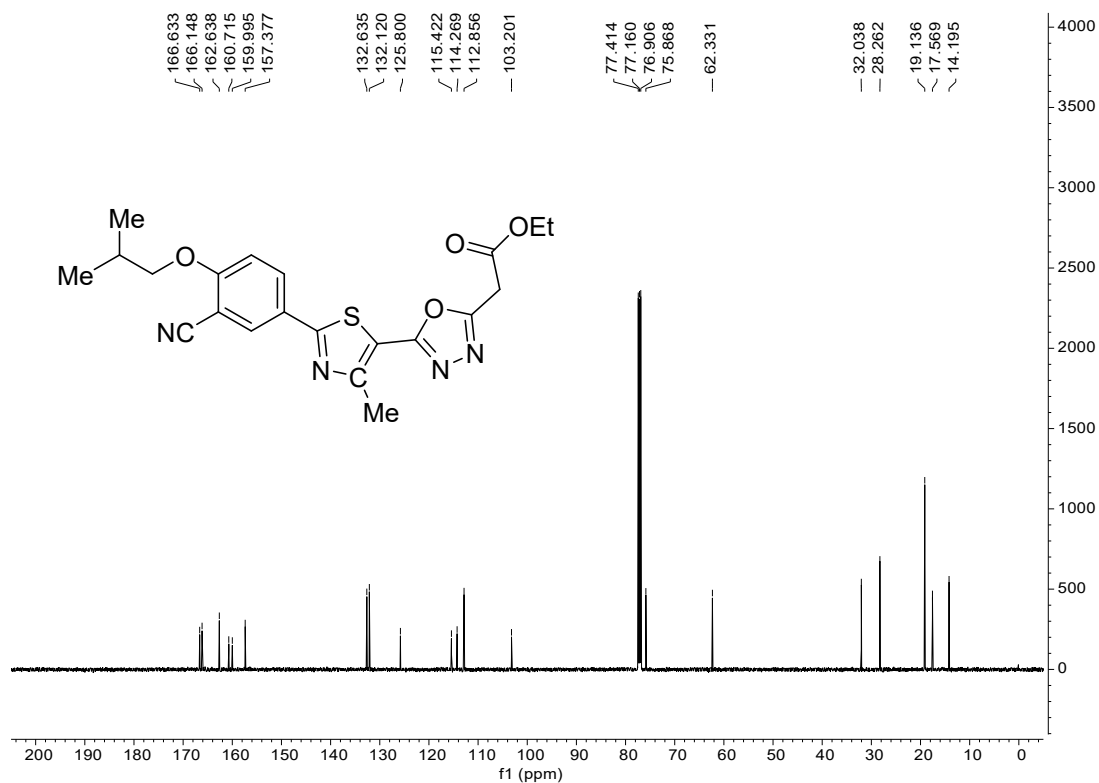

Ethyl 2-(5-([1,1'-biphenyl]-4-ylmethyl)-1,3,4-oxadiazol-2-yl)acetate (**2x**)

<sup>1</sup>H NMR (500 MHz, CDCl<sub>3</sub>) spectra of **2x**

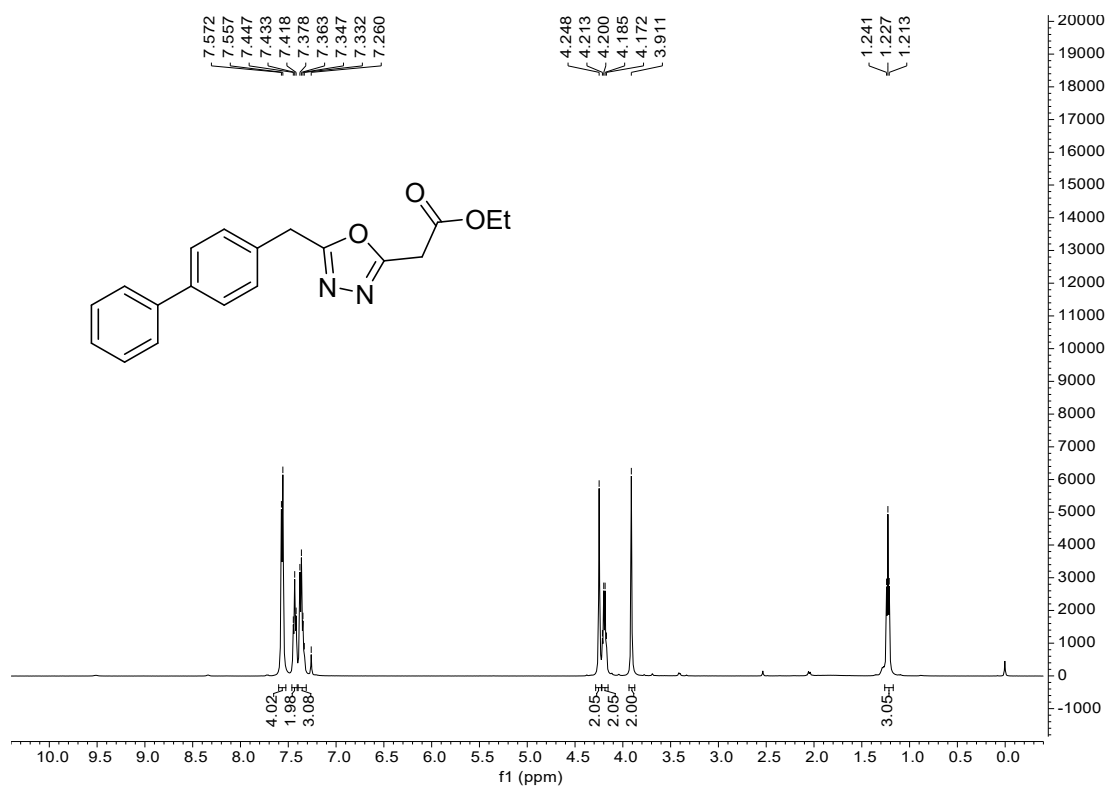

<sup>13</sup>C NMR (125 MHz, CDCl<sub>3</sub>) spectra of **2x**

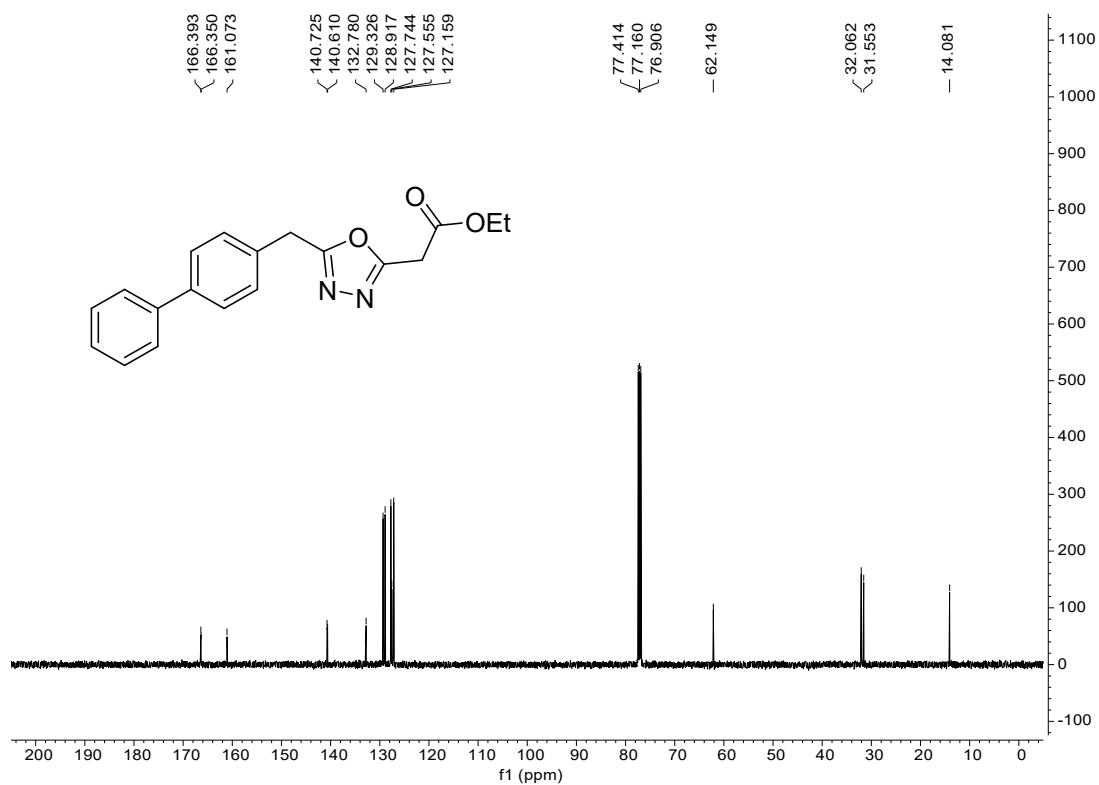

Ethyl 2-(5-(1-(4-isobutylphenyl)ethyl)-1,3,4-oxadiazol-2-yl)acetate (**2y**)

<sup>1</sup>H NMR (500 MHz, CDCl<sub>3</sub>) spectra of **2y**

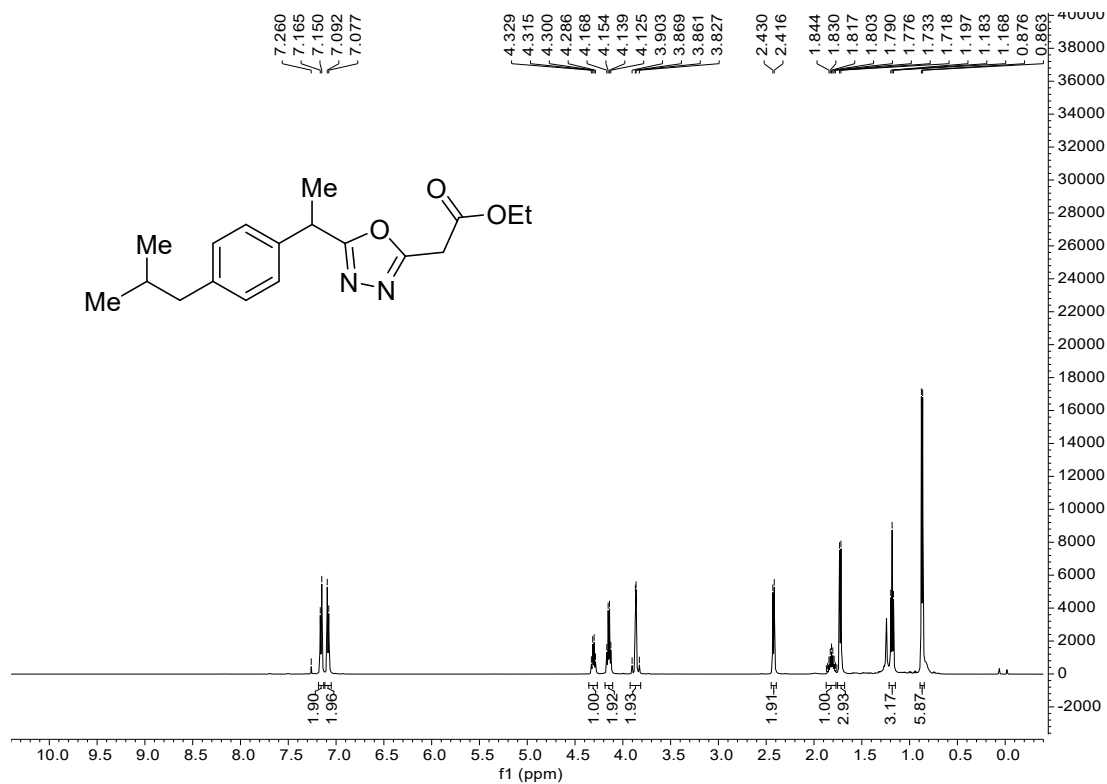

<sup>13</sup>C NMR (125 MHz, CDCl<sub>3</sub>) spectra of **2y**

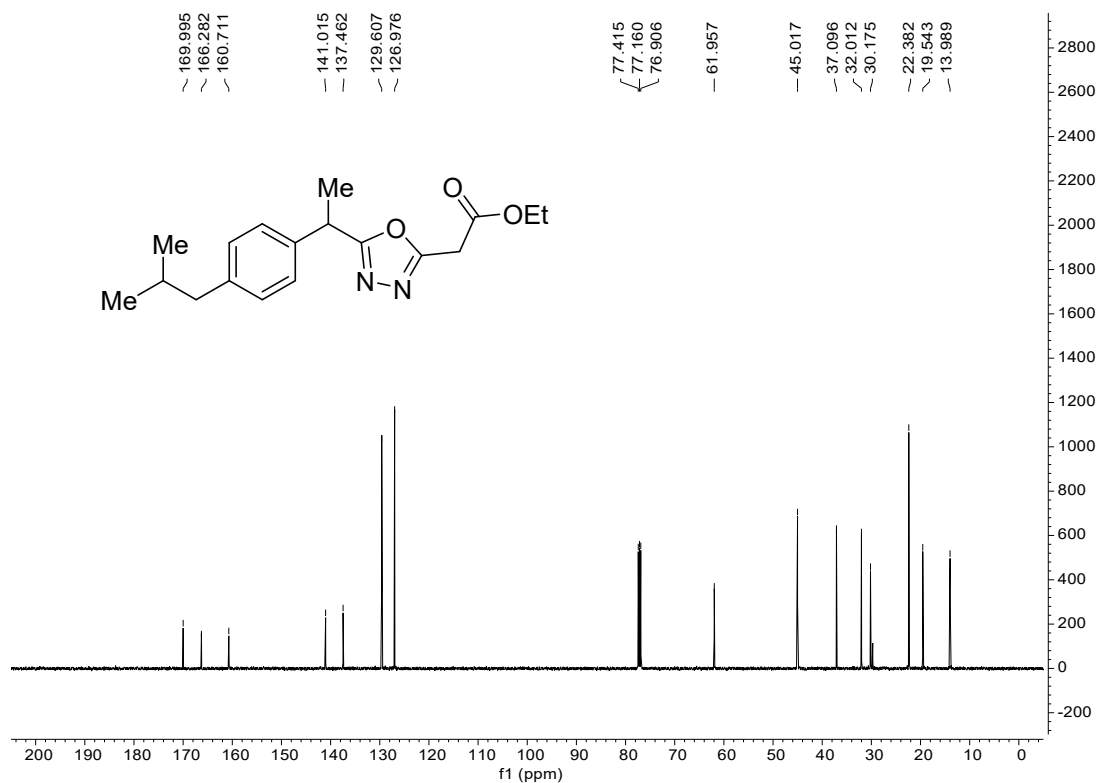

Ethyl 2-(5-(2-(4-chlorophenoxy)propan-2-yl)-1,3,4-oxadiazol-2-yl)acetate (**2z**)

<sup>1</sup>H NMR (500 MHz, CDCl<sub>3</sub>) spectra of **2z**

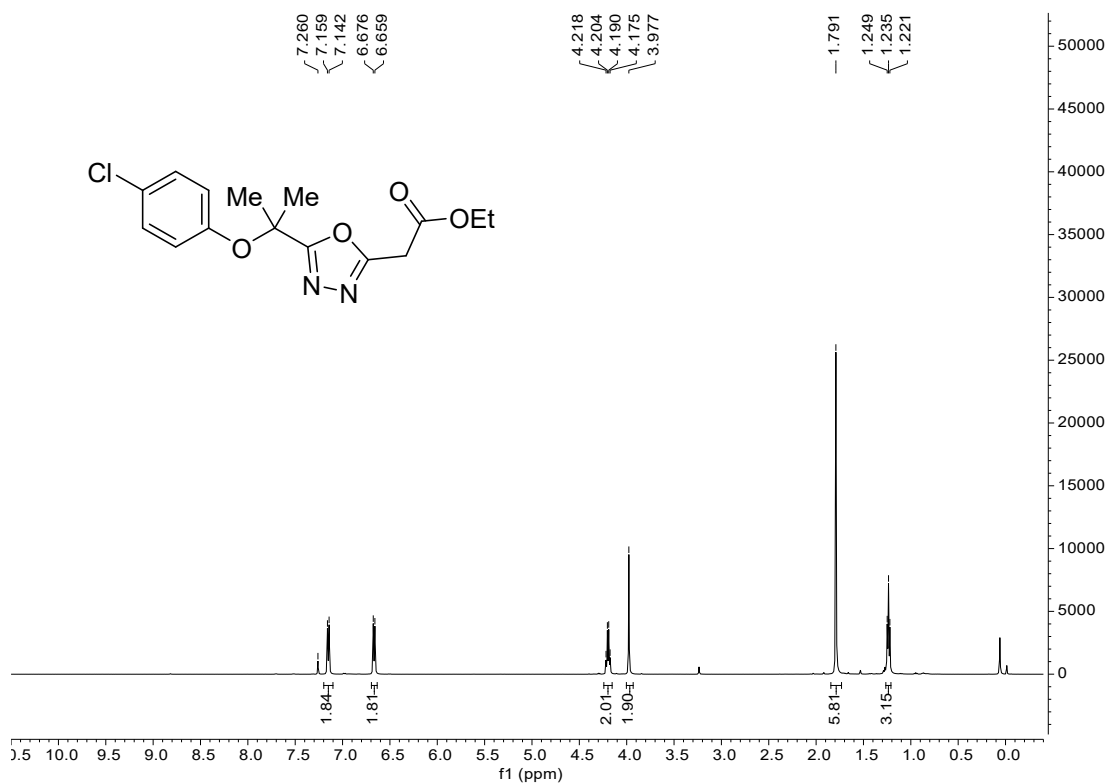

$^{13}\text{C}$  NMR (125 MHz,  $\text{CDCl}_3$ ) spectra of **2z**

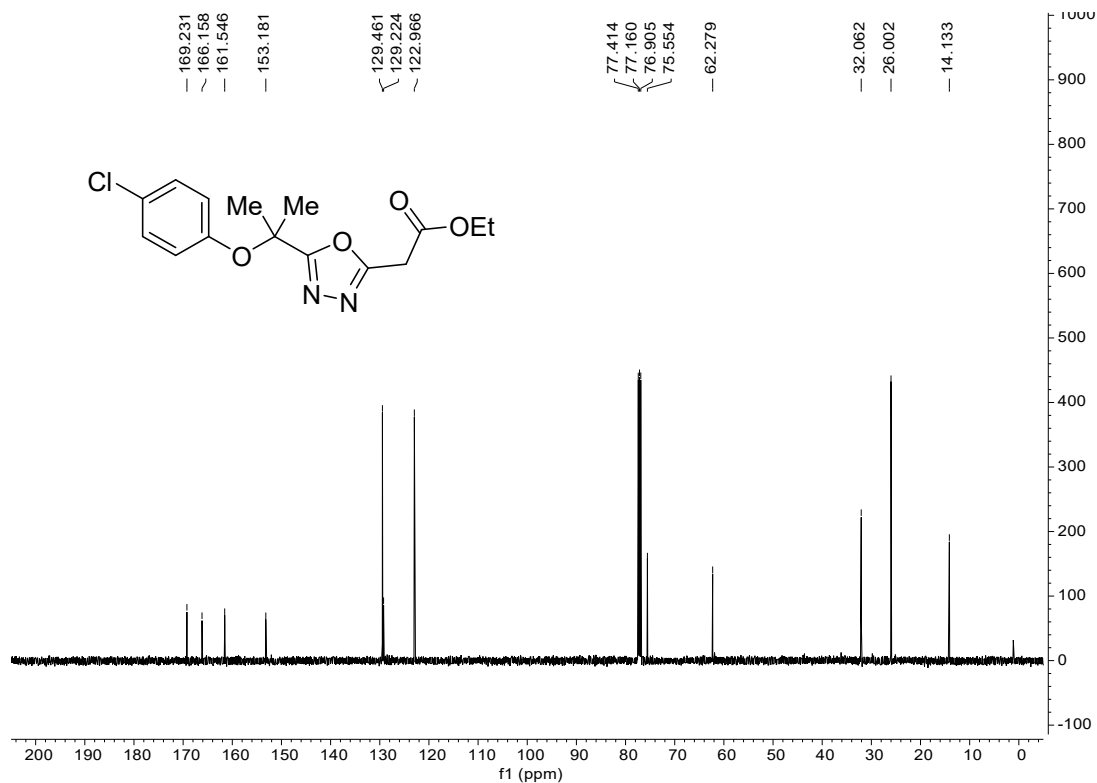

Ethyl 2-(5-phenyl-1,3,4-thiadiazol-2-yl)acetate (**4a**)

$^1\text{H}$  NMR (500 MHz,  $\text{CDCl}_3$ ) spectra of **4a**

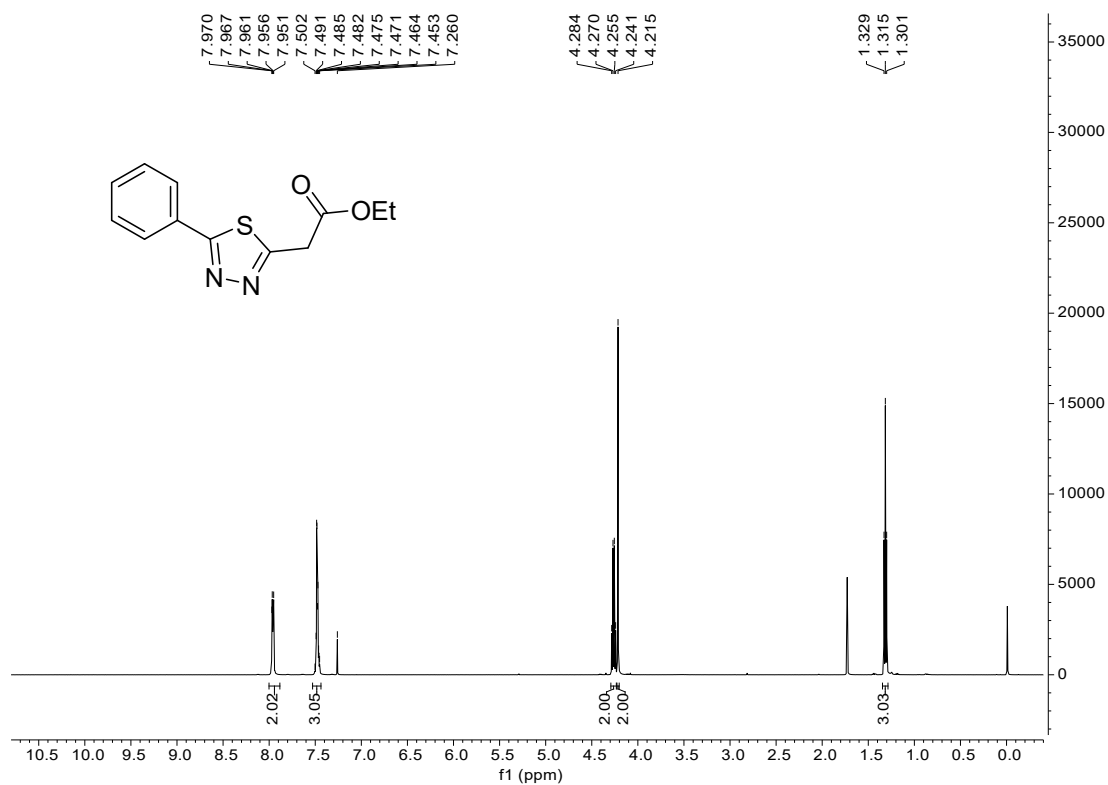

$^{13}\text{C}$  NMR (125 MHz,  $\text{CDCl}_3$ ) spectra of **4a**

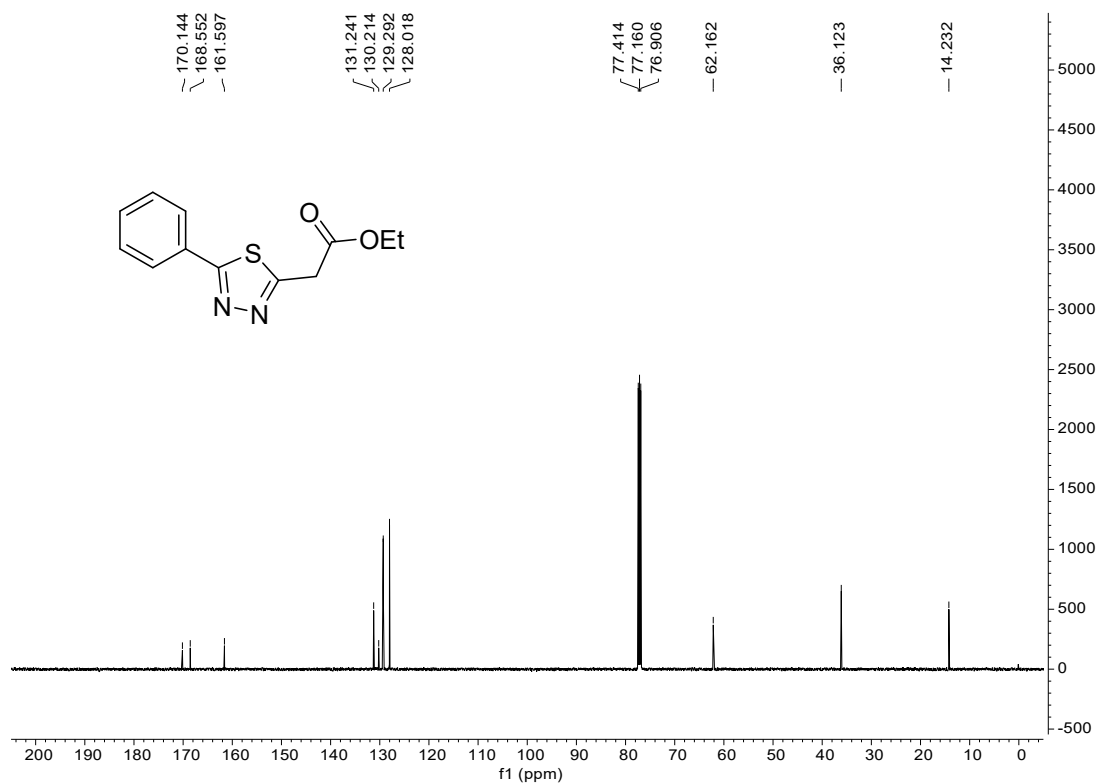

Ethyl 2-(5-(4-fluorophenyl)-1,3,4-thiazol-2-yl)acetate (**4b**)

$^1\text{H}$  NMR (500 MHz,  $\text{CDCl}_3$ ) spectra of **4b**

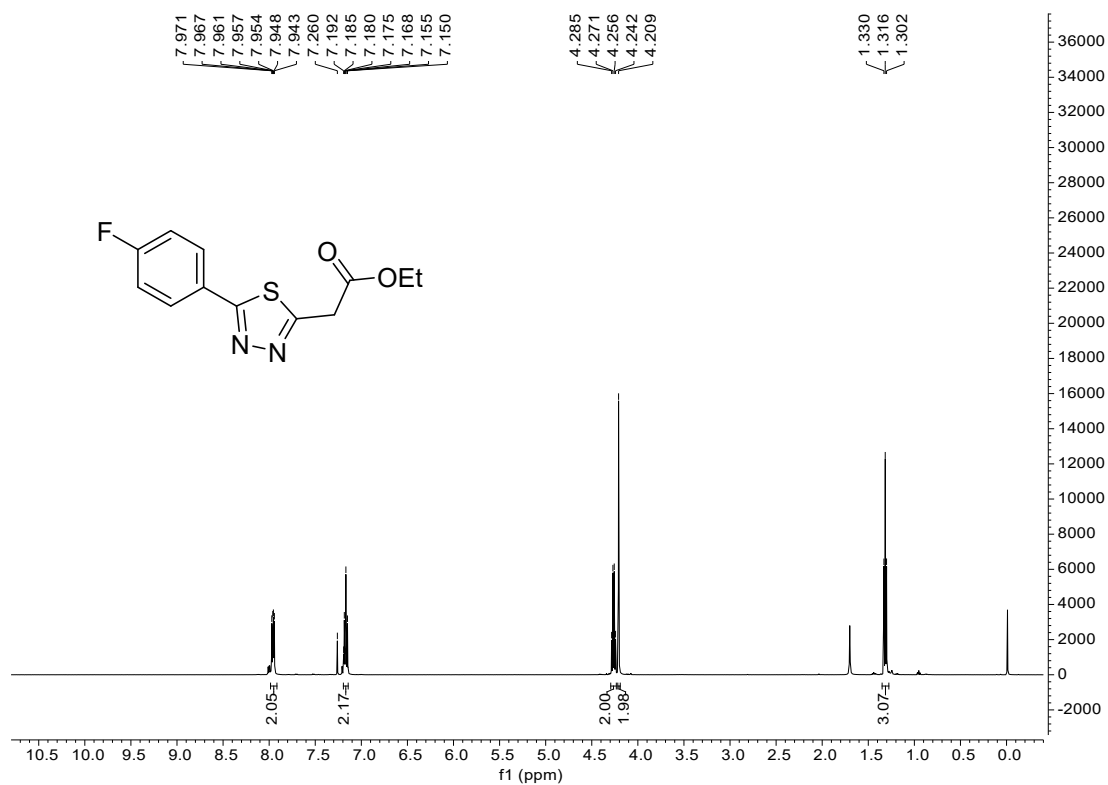

<sup>13</sup>C NMR (125 MHz, CDCl<sub>3</sub>) spectra of **4b**

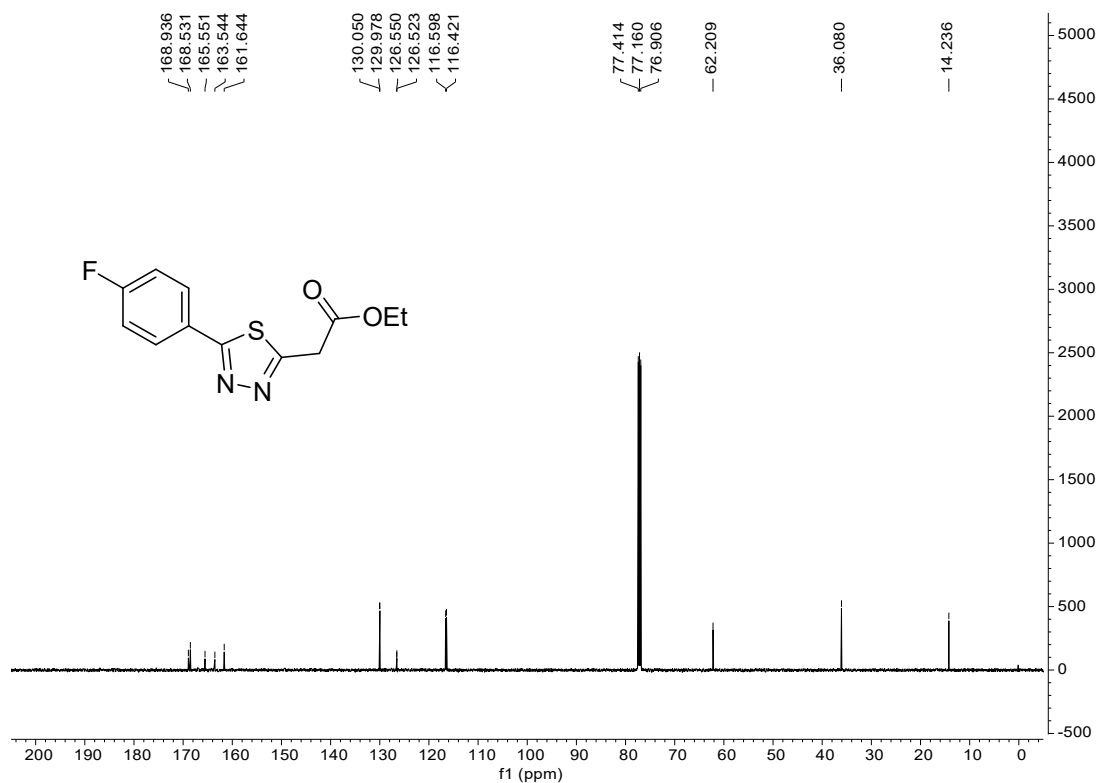

<sup>19</sup>F NMR (376 MHz, CDCl<sub>3</sub>) spectra of **4b**

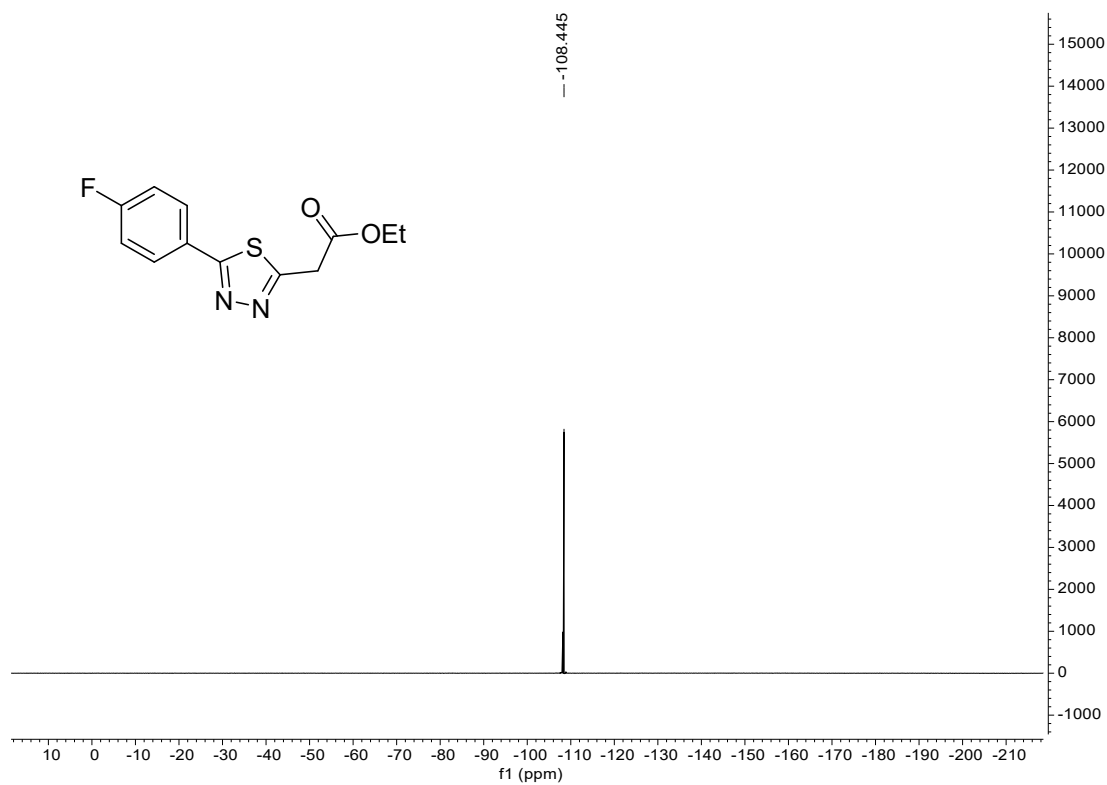

### Ethyl 2-(5-([1,1'-biphenyl]-4-yl)-1,3,4-thiadiazol-2-yl)acetate(4c)

<sup>1</sup>H NMR (500 MHz, CDCl<sub>3</sub>) spectra of 4c

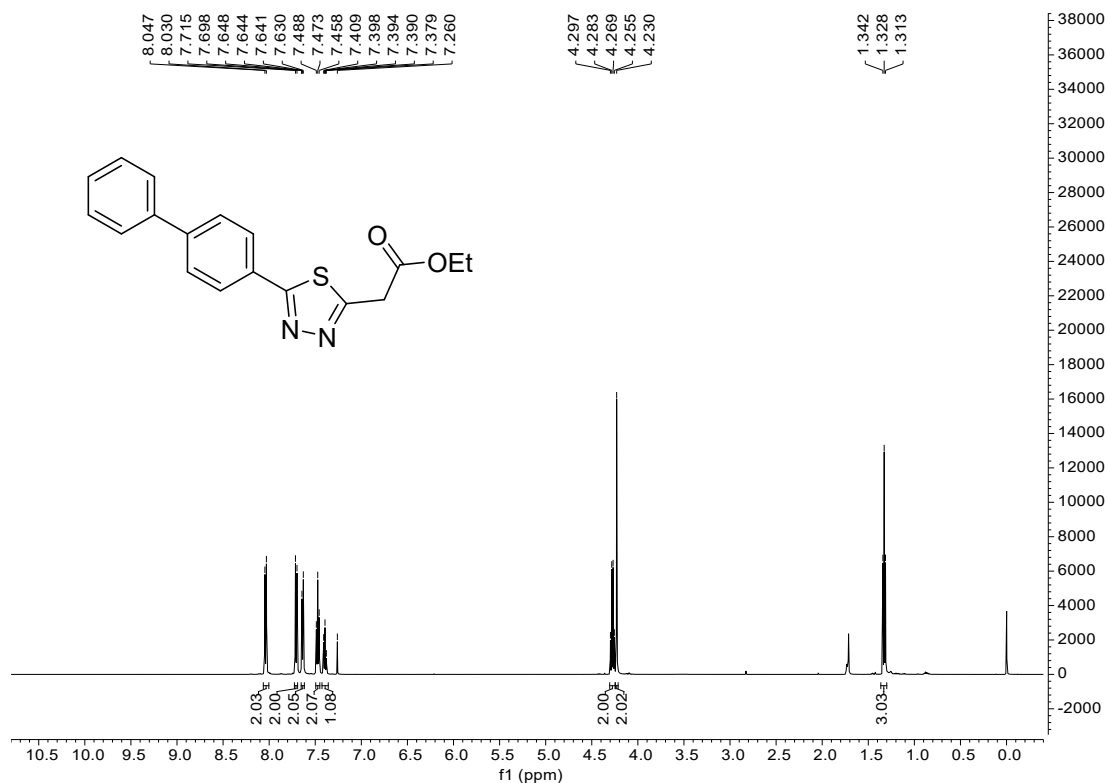

<sup>13</sup>C NMR (125 MHz, CDCl<sub>3</sub>) spectra of 4c

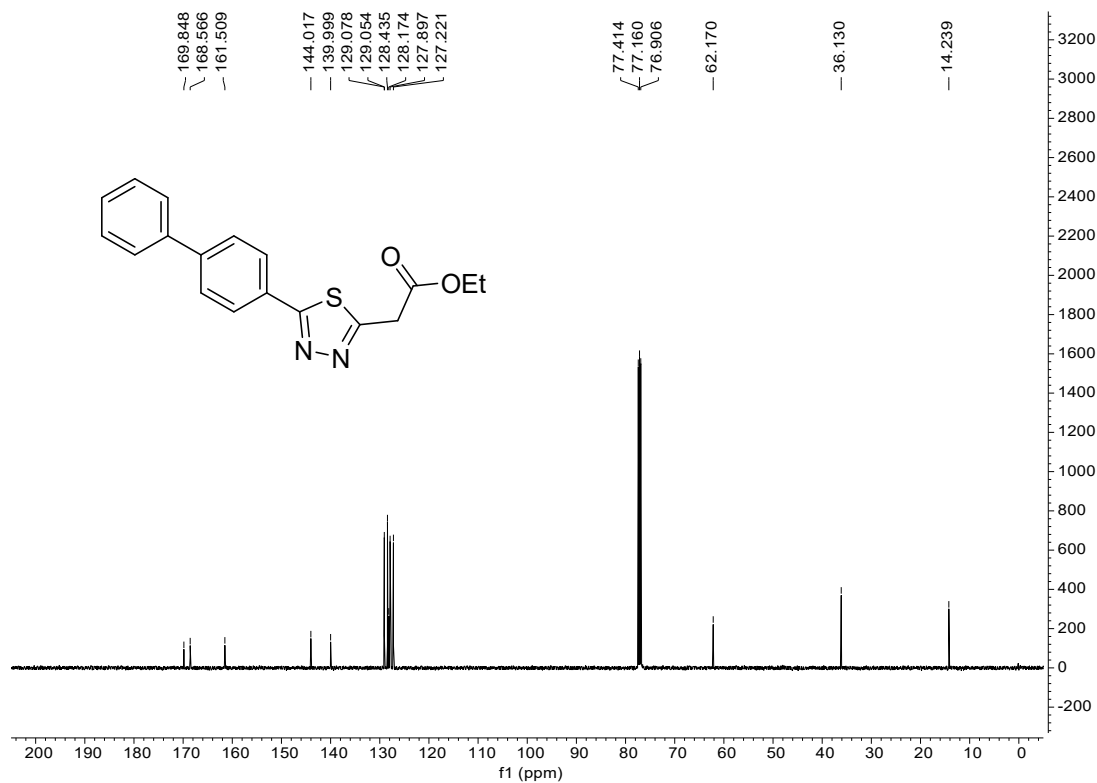



### Ethyl 2-(5-(naphthalen-2-yl)-1,3,4-thiadiazol-2-yl)acetate(4d)

<sup>1</sup>H NMR (500 MHz, CDCl<sub>3</sub>) spectra of 4d

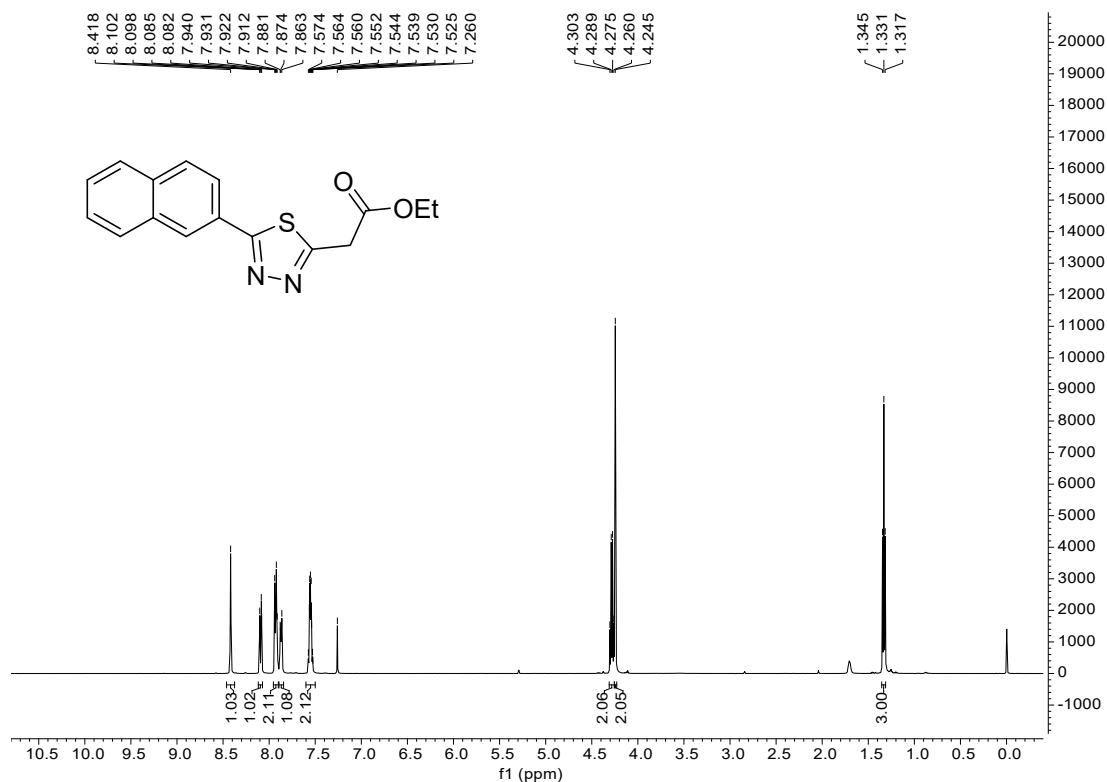

<sup>13</sup>C NMR (125 MHz, CDCl<sub>3</sub>) spectra of 4d

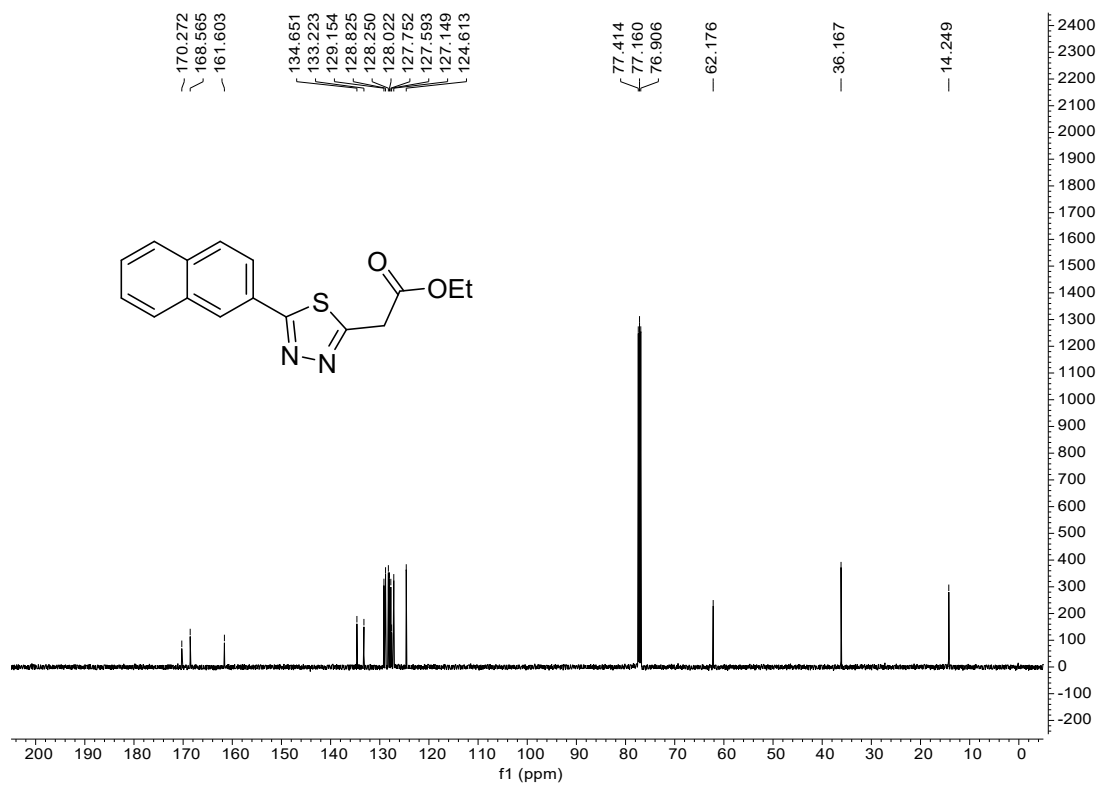

### Ethyl 2-(5-(pyrazin-2-yl)-1,3,4-thiadiazol-2-yl)acetate(4e)

<sup>1</sup>H NMR (500 MHz, CDCl<sub>3</sub>) spectra of 4e

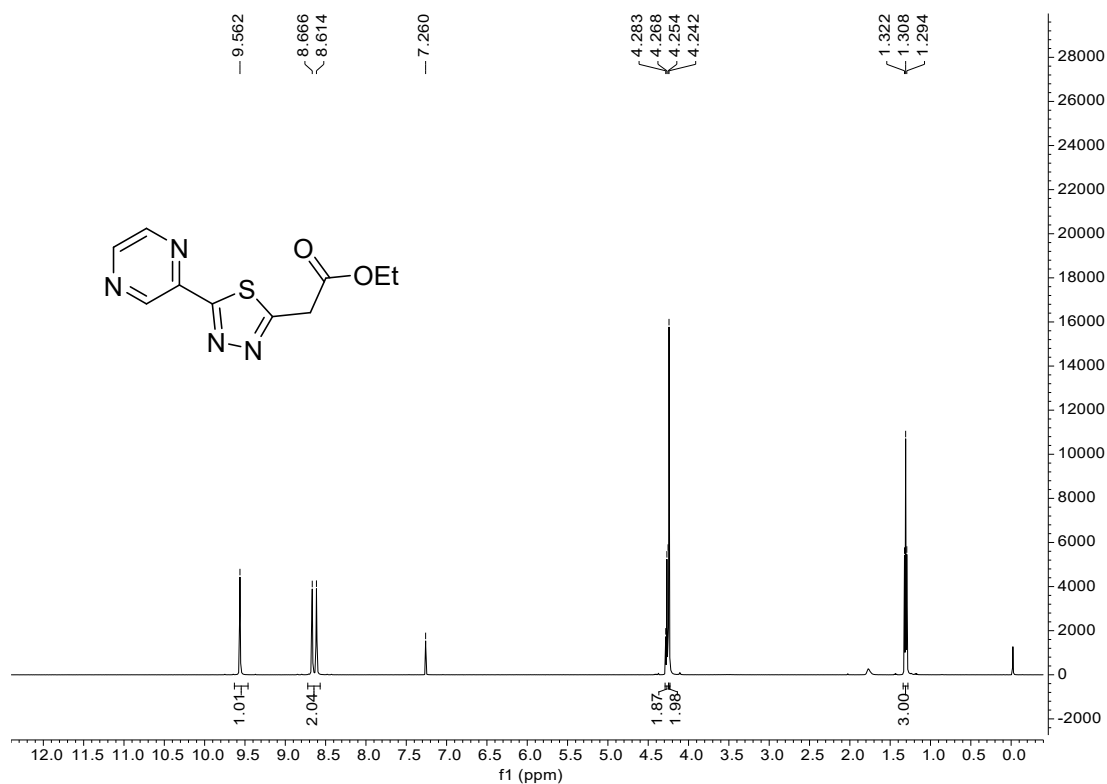

<sup>13</sup>C NMR (125 MHz, CDCl<sub>3</sub>) spectra of 4e

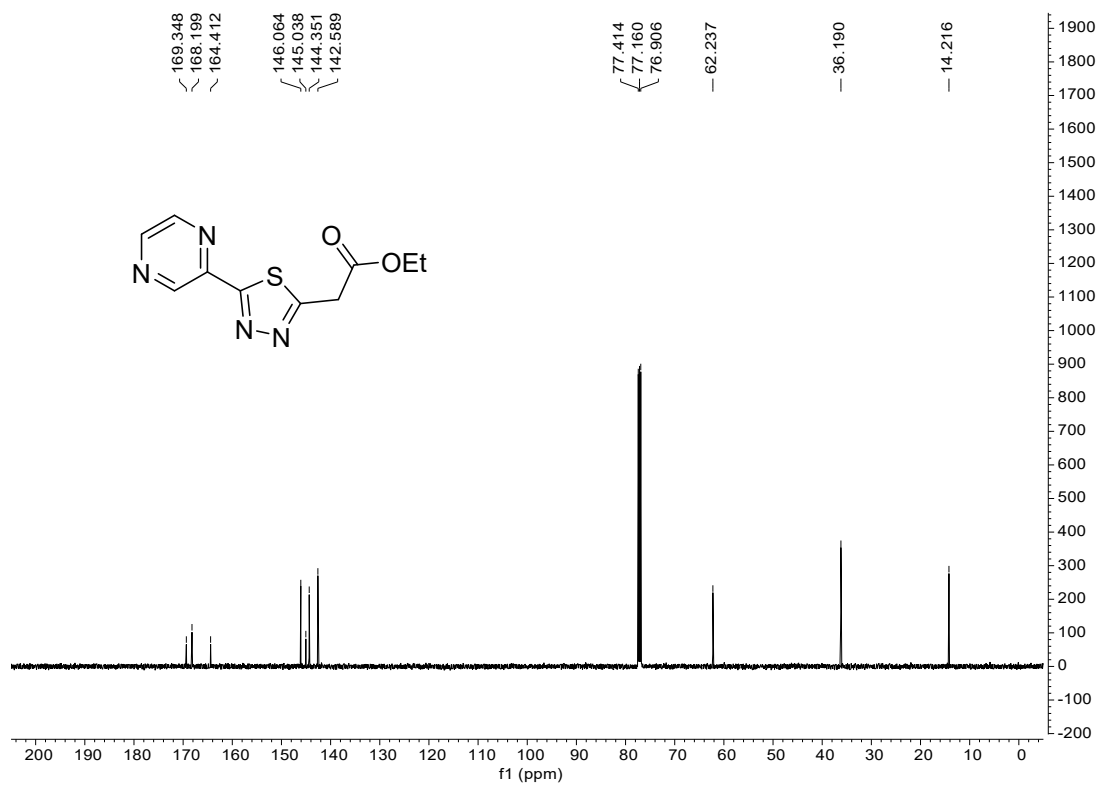

### Ethyl 2-(5-amino-1,3,4-thiadiazol-2-yl)acetate (4f)

<sup>1</sup>H NMR (500 MHz, DMSO-*d*<sub>6</sub>) spectra of 4f

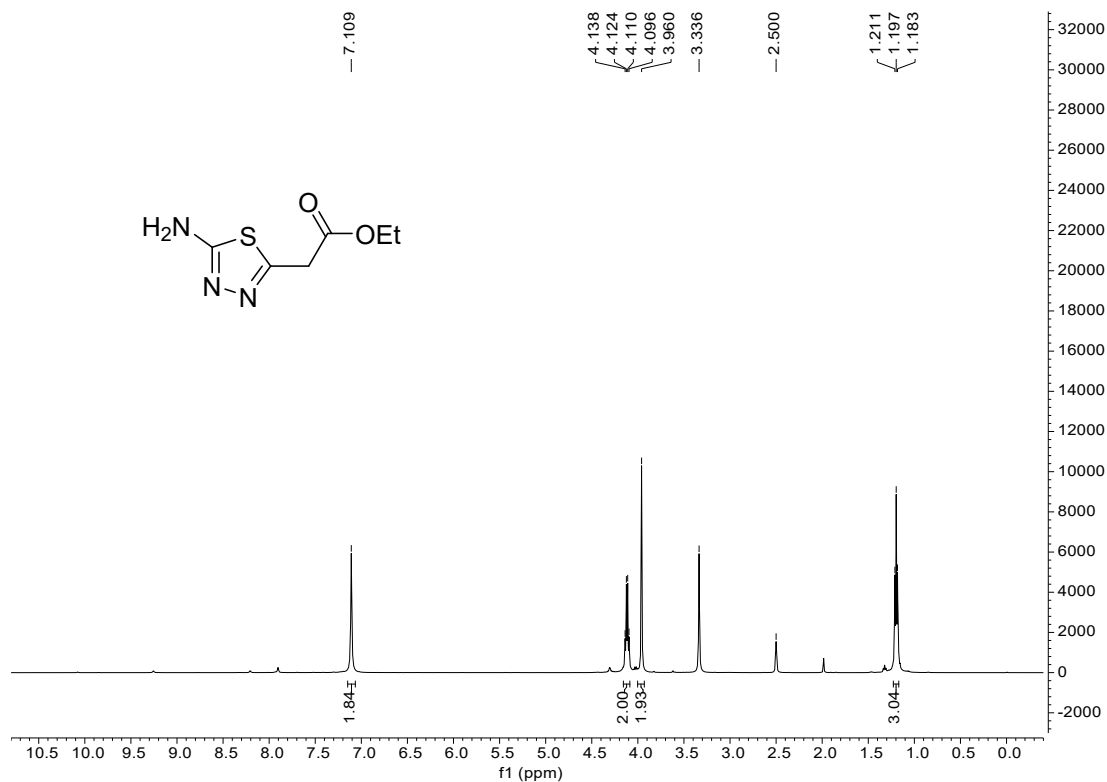

<sup>13</sup>C NMR (125 MHz, DMSO-*d*<sub>6</sub>) spectra of 4f

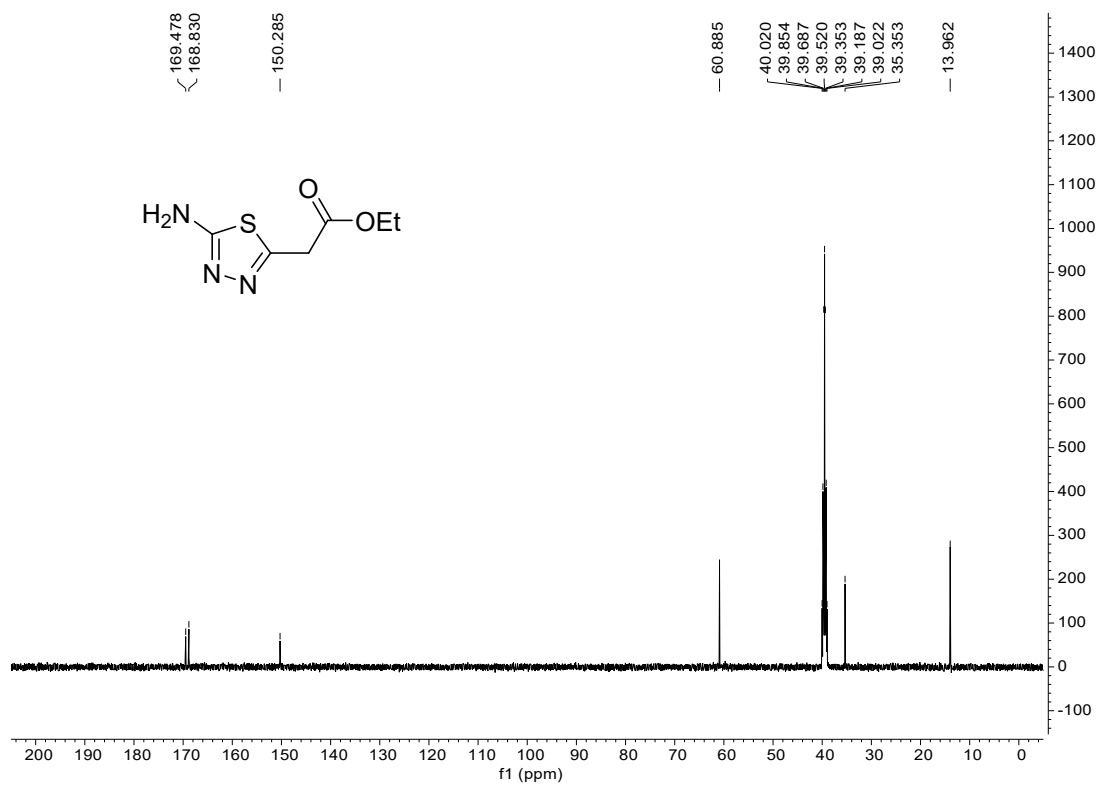

### Ethyl 2-(5-(dimethylamino)-1,3,4-thiadiazol-2-yl)acetate(4g)

<sup>1</sup>H NMR (500 MHz, CDCl<sub>3</sub>) spectra of 4g

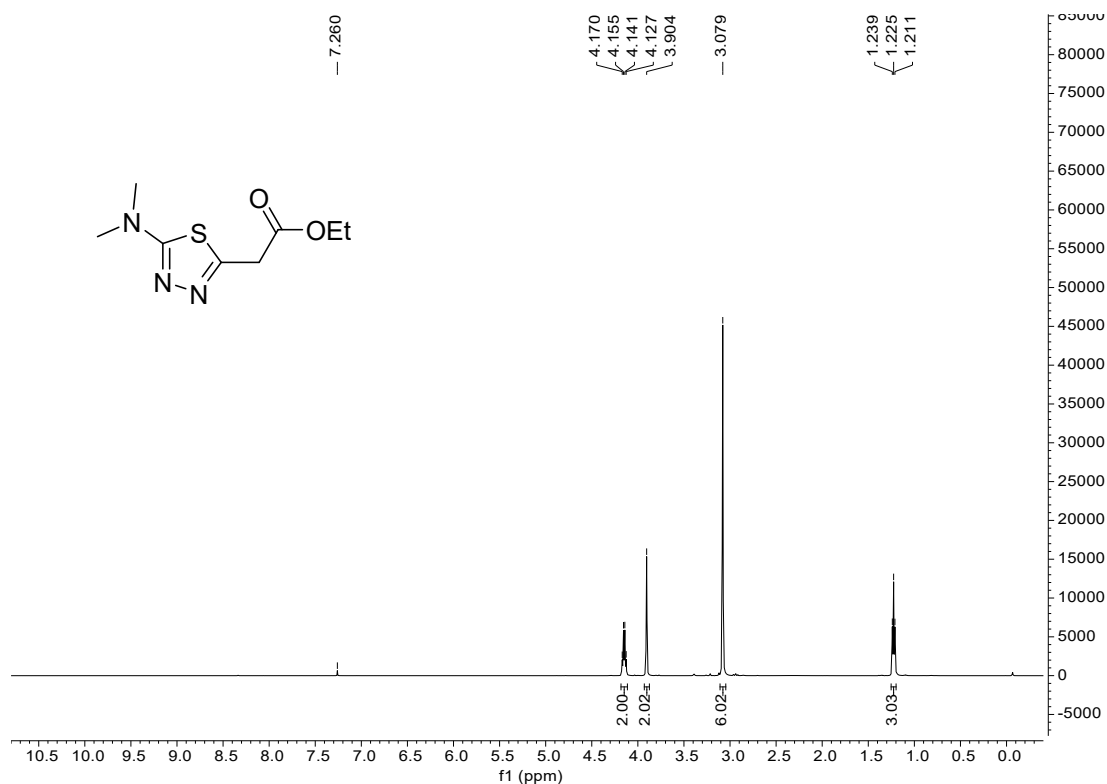

<sup>13</sup>C NMR (125 MHz, CDCl<sub>3</sub>) spectra of 4g

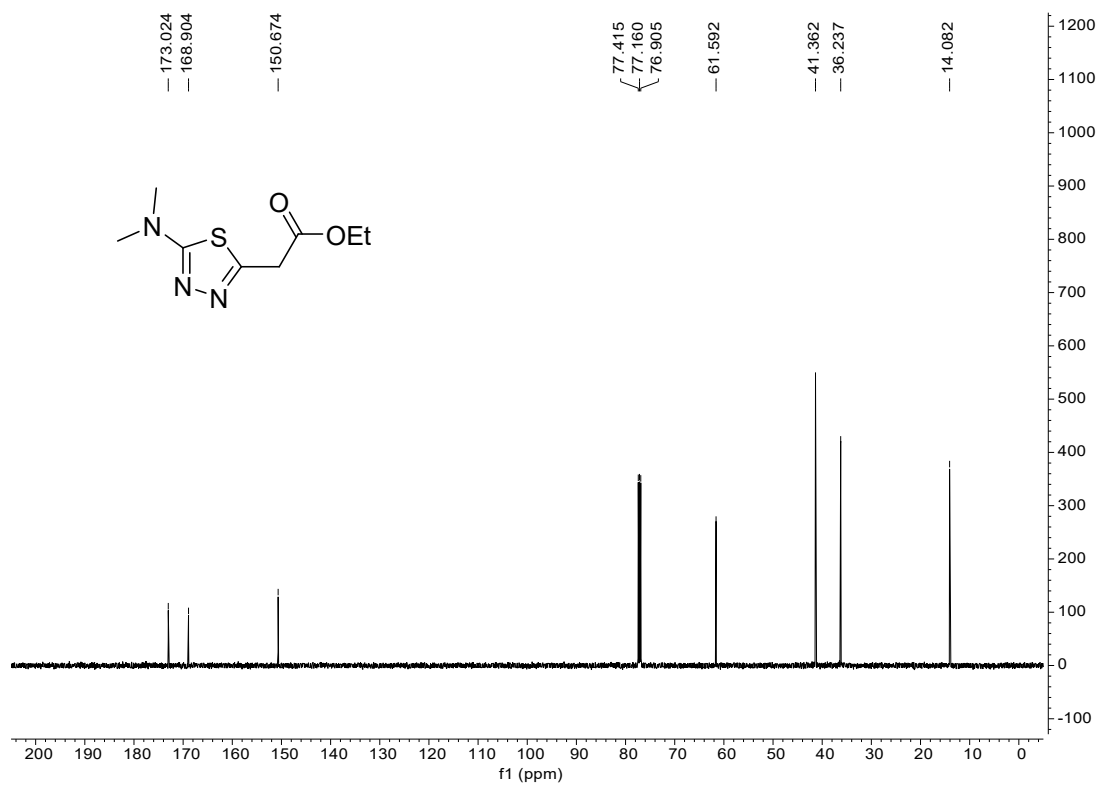

### Ethyl 2-(5-phenyl-1H-1,2,4-triazol-3-yl)acetate (6a)

<sup>1</sup>H NMR (500 MHz, CDCl<sub>3</sub>) spectra of 6a

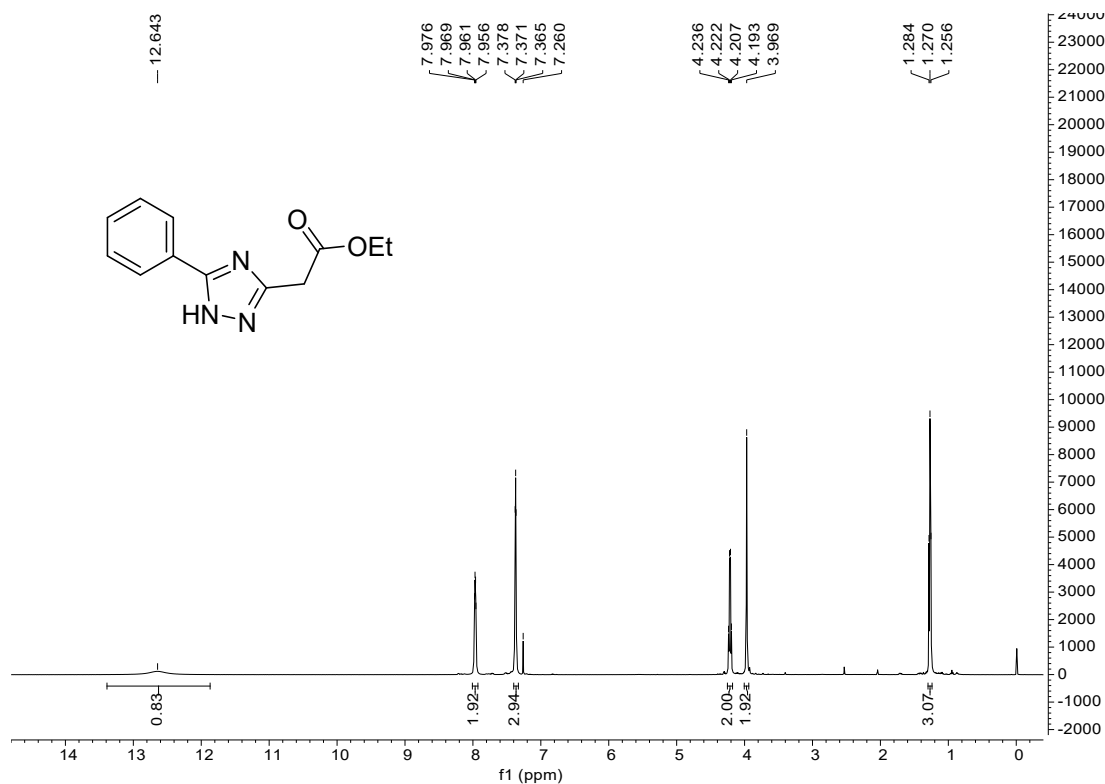

<sup>13</sup>C NMR (125 MHz, CDCl<sub>3</sub>) spectra of 6a

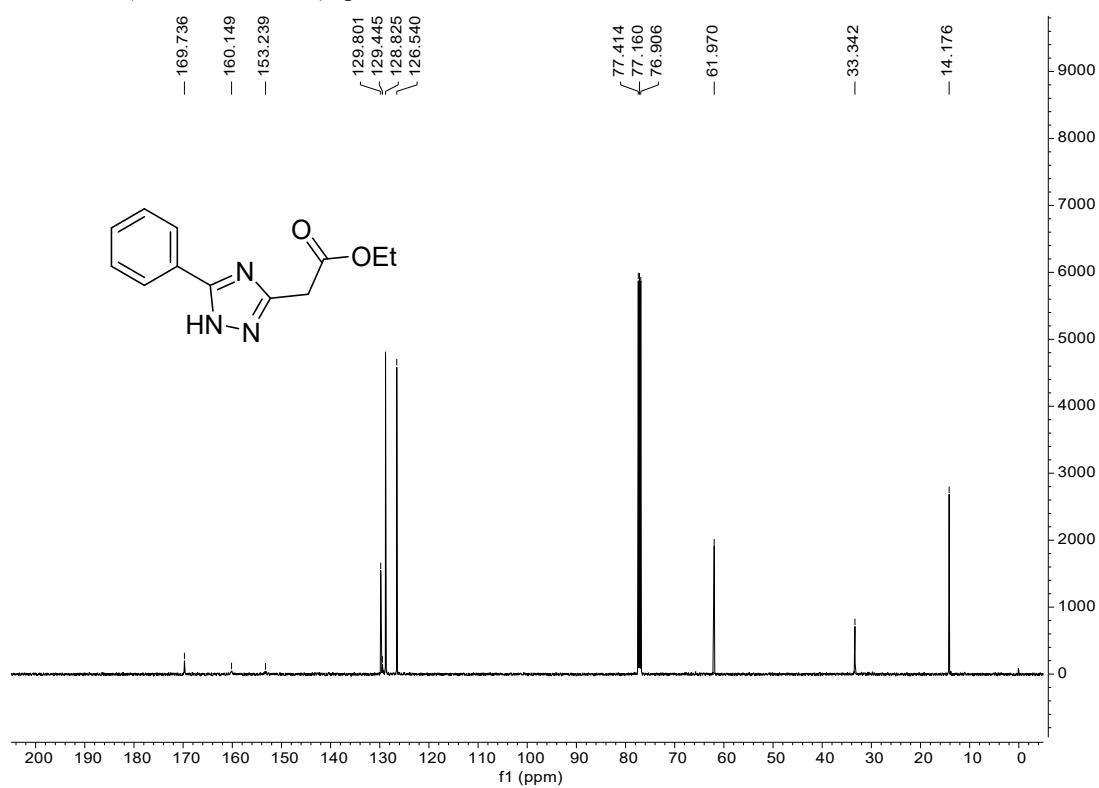

### Ethyl 2-(5-(p-tolyl)-1H-1,2,4-triazol-3-yl)acetate (**6b**)

<sup>1</sup>H NMR (500 MHz, CDCl<sub>3</sub>) spectra of **6b**

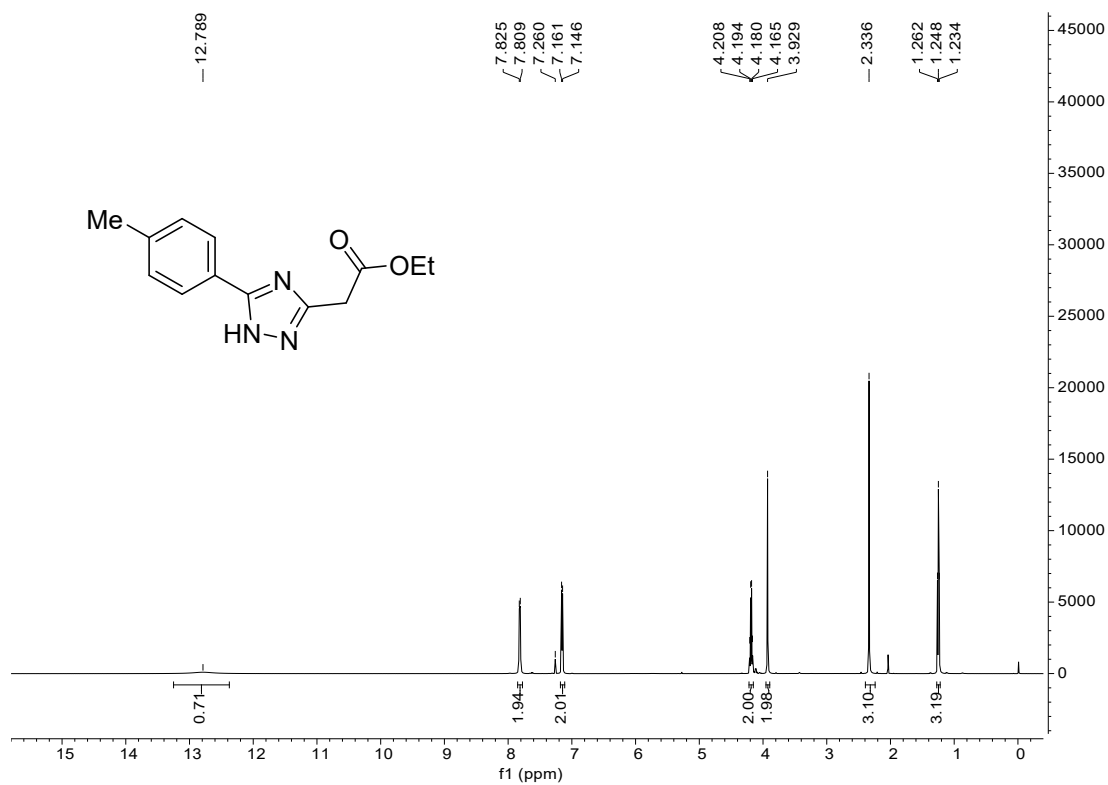

<sup>13</sup>C NMR (125 MHz, CDCl<sub>3</sub>) spectra of **6b**

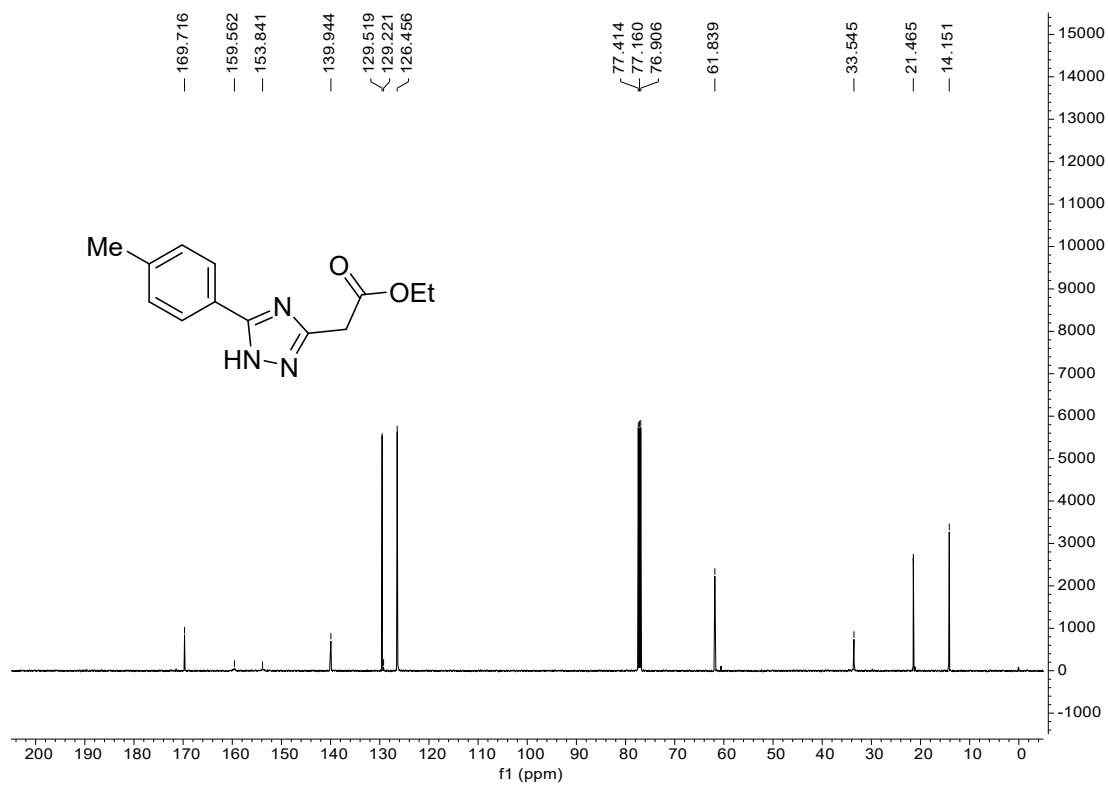

**Ethyl 2-(5-(benzo[d][1,3]dioxol-5-yl)-1H-1,2,4-triazol-3-yl)acetate (6c)**

<sup>1</sup>H NMR (500 MHz, CDCl<sub>3</sub>) spectra of **6c**

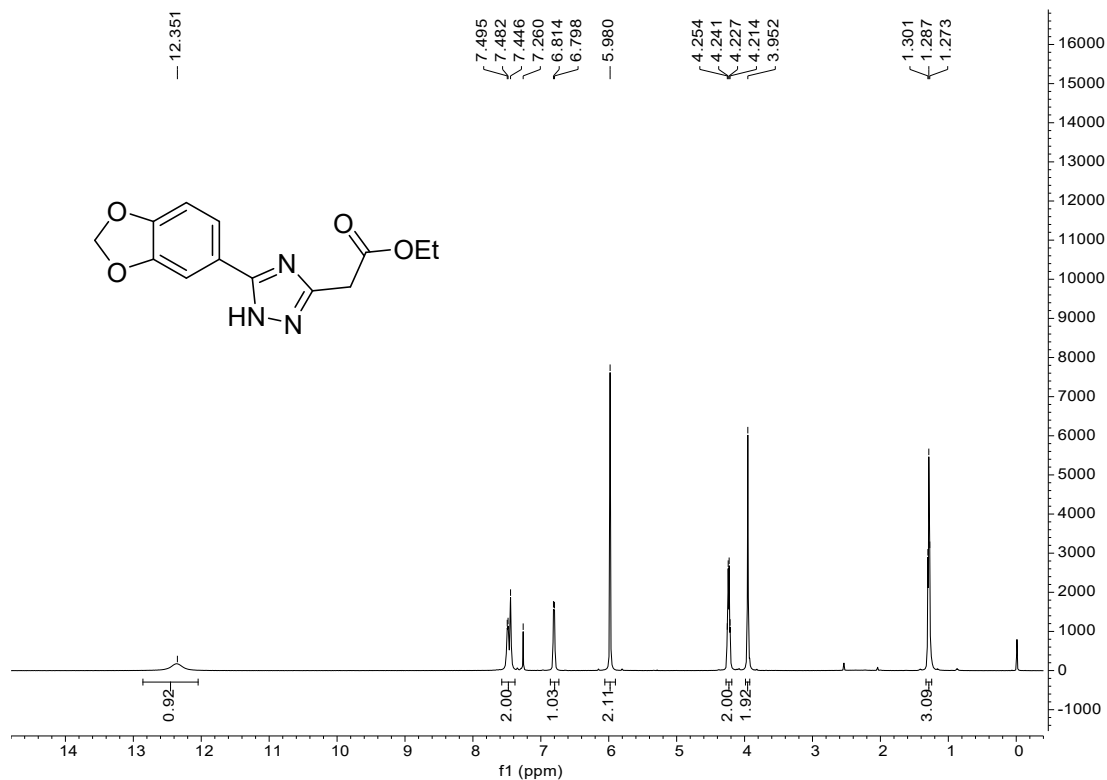

<sup>13</sup>C NMR (125 MHz, CDCl<sub>3</sub>) spectra of **6c**

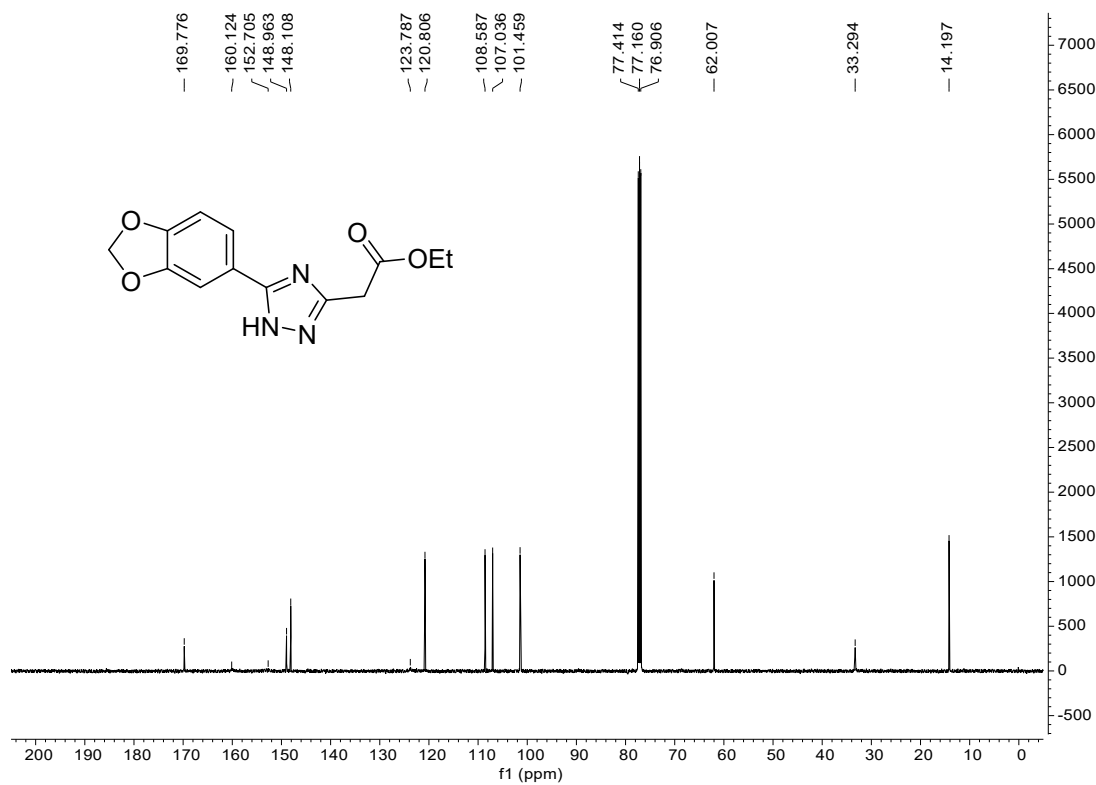

**Ethyl 2-(5-(4-(trifluoromethyl)phenyl)-1H-1,2,4-triazol-3-yl)acetate (6d)**

<sup>1</sup>H NMR (500 MHz, CDCl<sub>3</sub>) spectra of **6d**

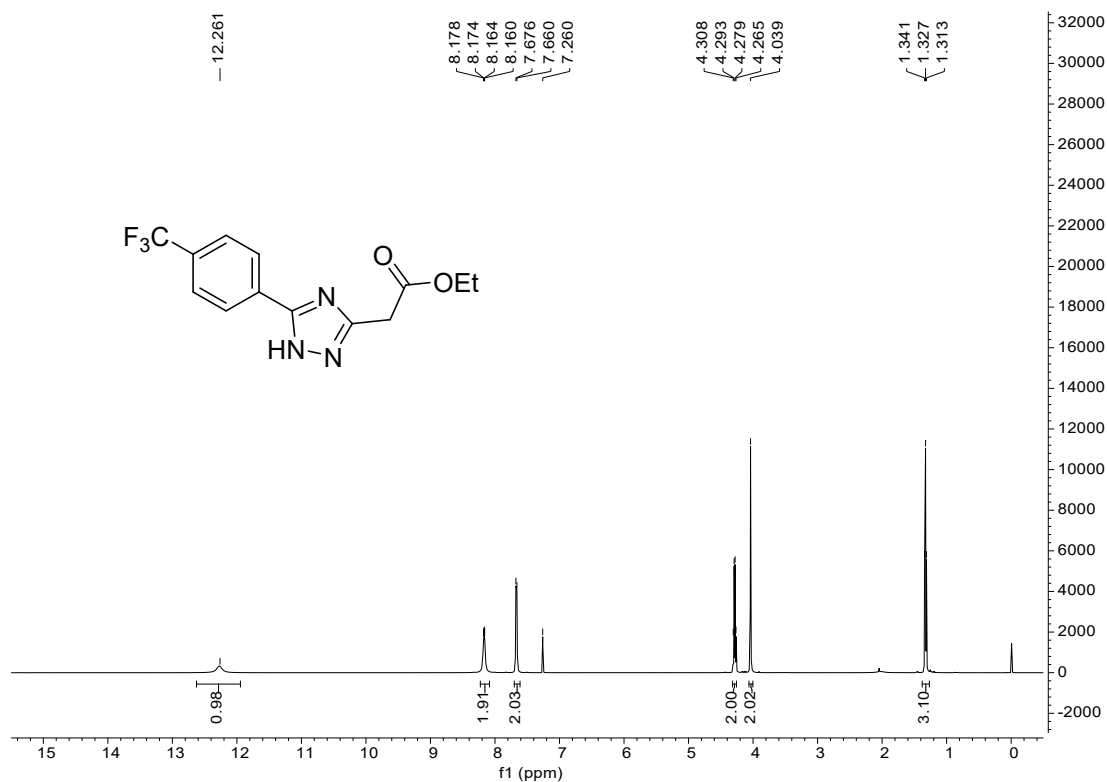

<sup>13</sup>C NMR (125 MHz, CDCl<sub>3</sub>) spectra of **6d**

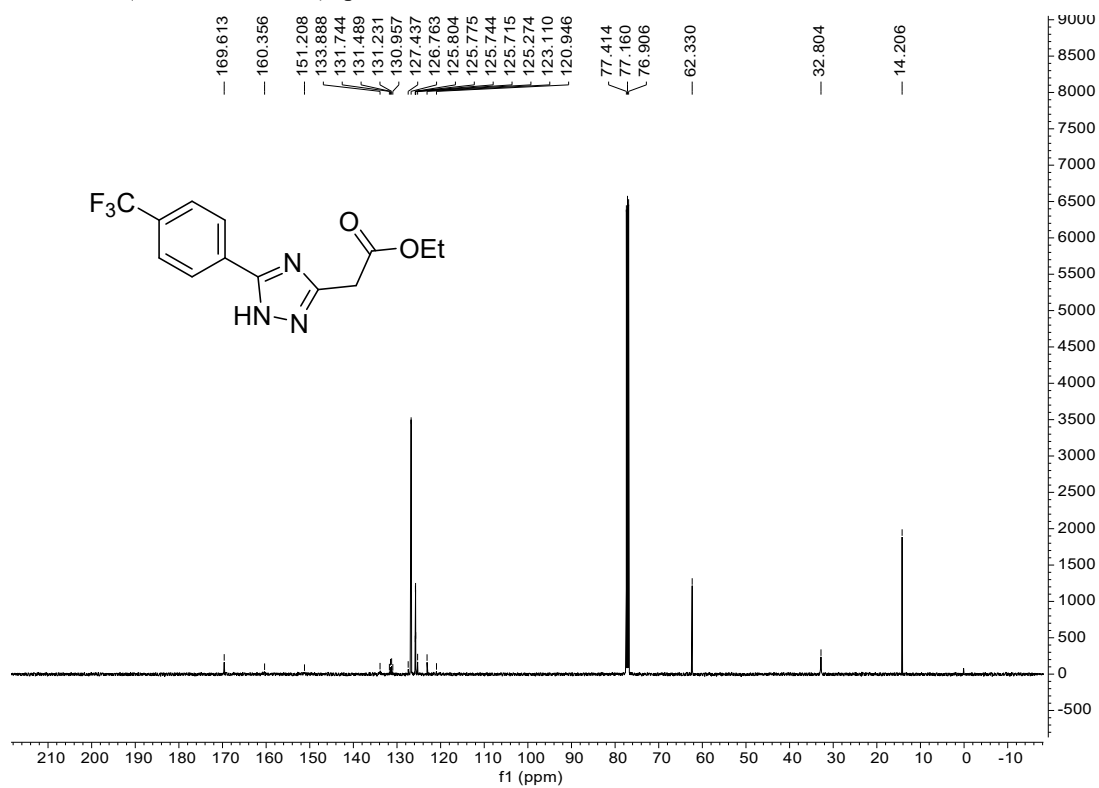



**<sup>19</sup>F NMR (376 MHz, CDCl<sub>3</sub>) spectra of 6d**

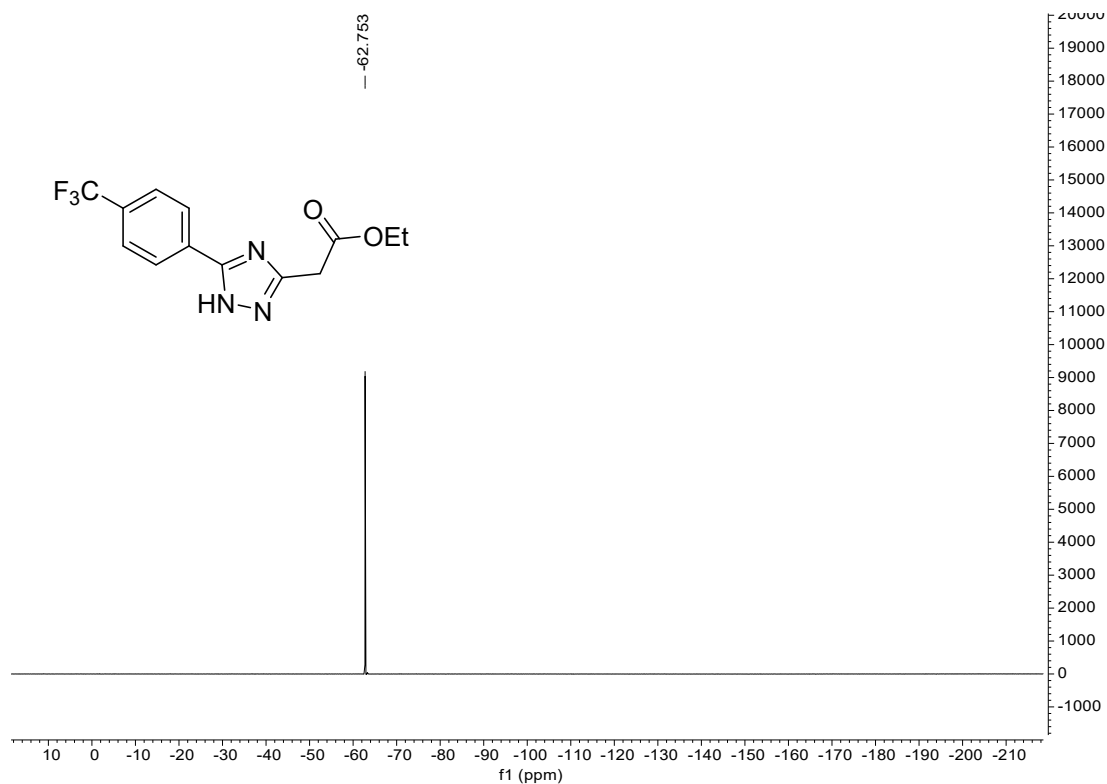

**Ethyl 2-(5-(4-fluorophenyl)-1H-1,2,4-triazol-3-yl)acetate (6e)**

**<sup>1</sup>H NMR (500 MHz, CDCl<sub>3</sub>) spectra of 6e**

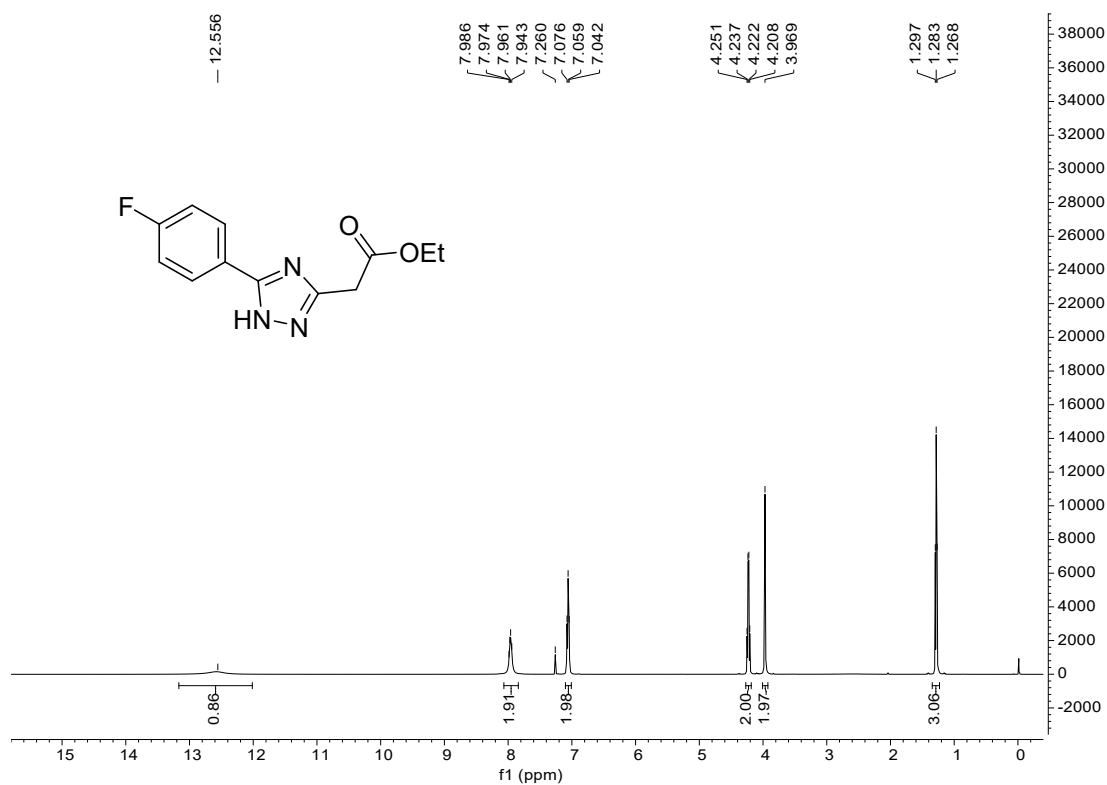

<sup>13</sup>C NMR (125 MHz, CDCl<sub>3</sub>) spectra of **6e**

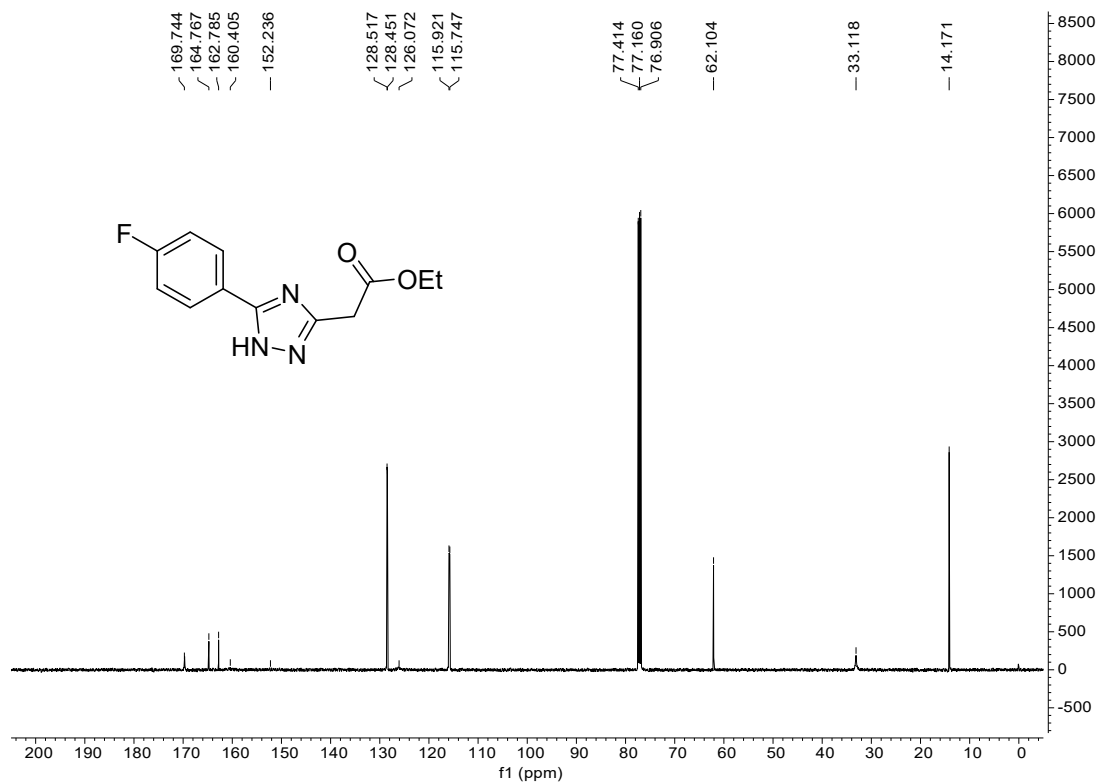

<sup>19</sup>F NMR (376 MHz, CDCl<sub>3</sub>) spectra of **6e**

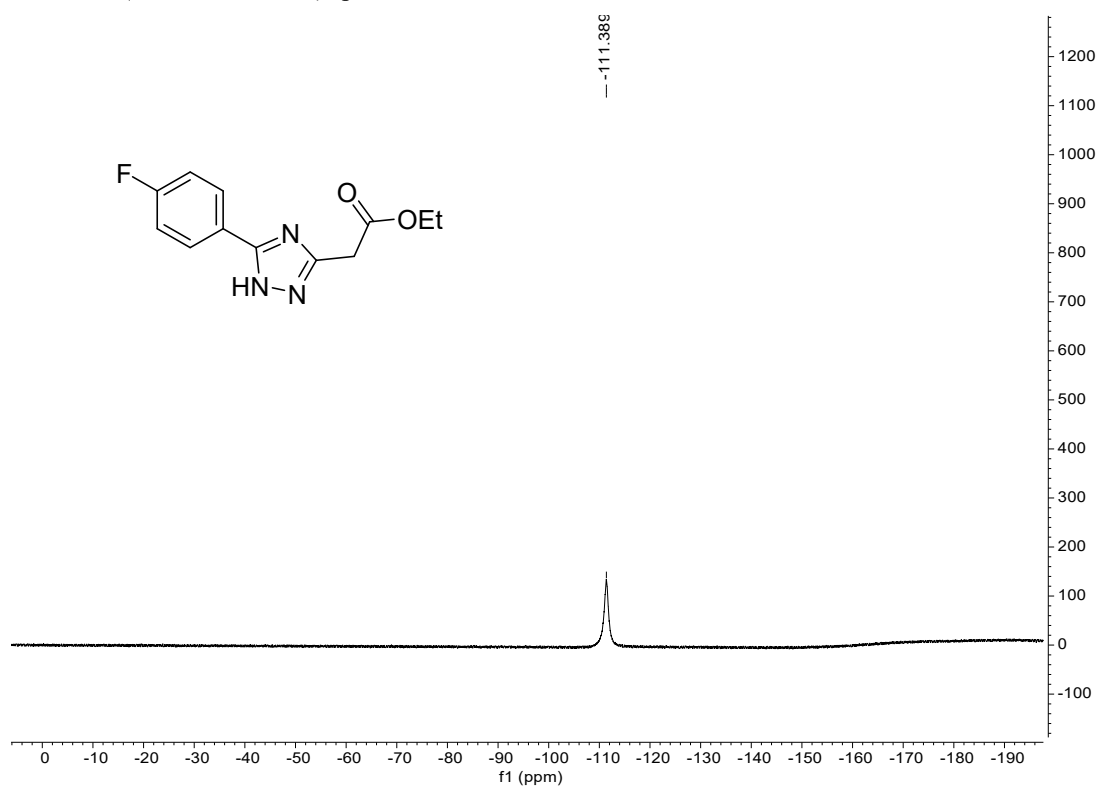

**Ethyl 2-(5-([1,1'-biphenyl]-4-yl)-1H-1,2,4-triazol-3-yl)acetate (6f)**

**<sup>1</sup>H NMR (500 MHz, DMSO-*d*<sub>6</sub>) spectra of 6f**

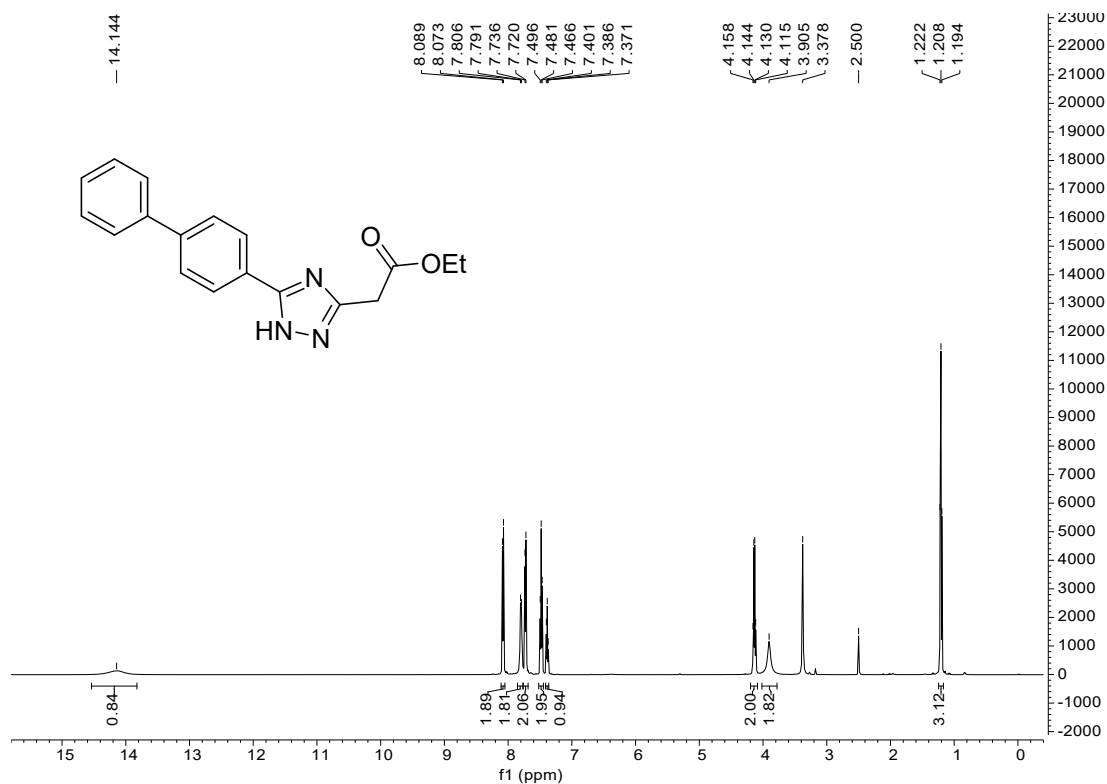

**<sup>13</sup>C NMR (125 MHz, DMSO-*d*<sub>6</sub>) spectra of 6f**

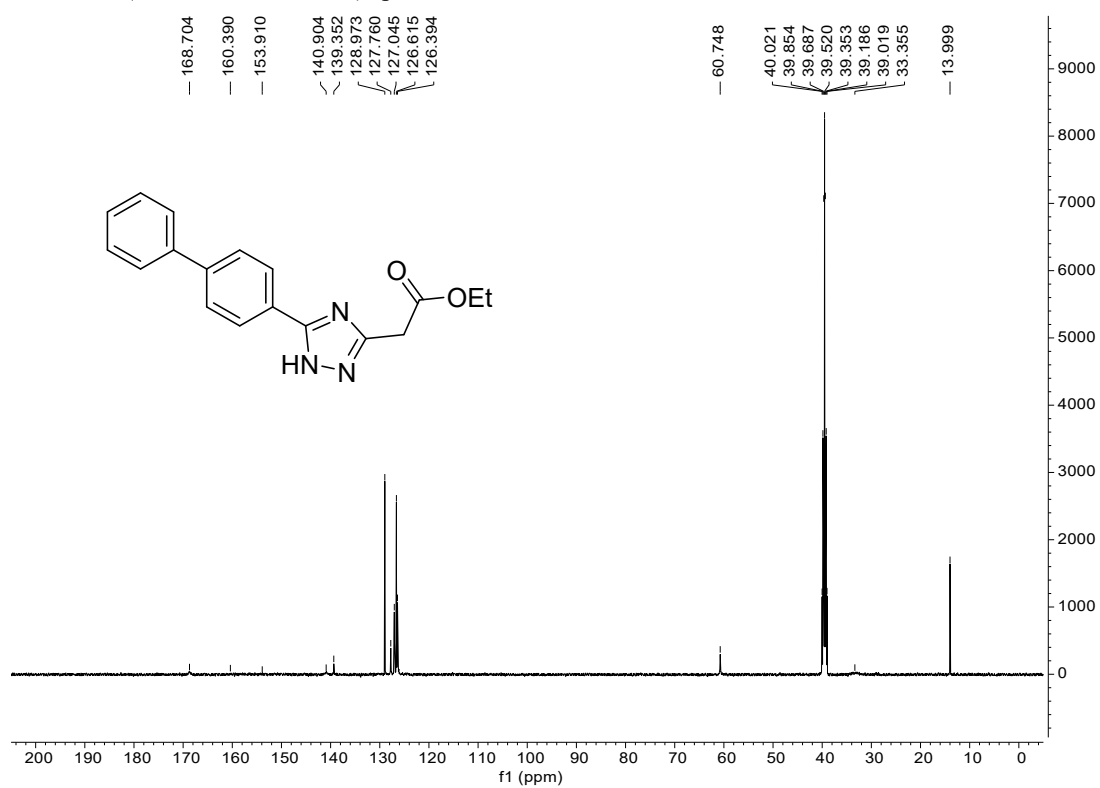

### 2-(5-phenyl-1,3,4-thiadiazol-2-yl)acetic acid (7)

<sup>1</sup>H NMR (500 MHz, DMSO-*d*<sub>6</sub>) spectra of 7

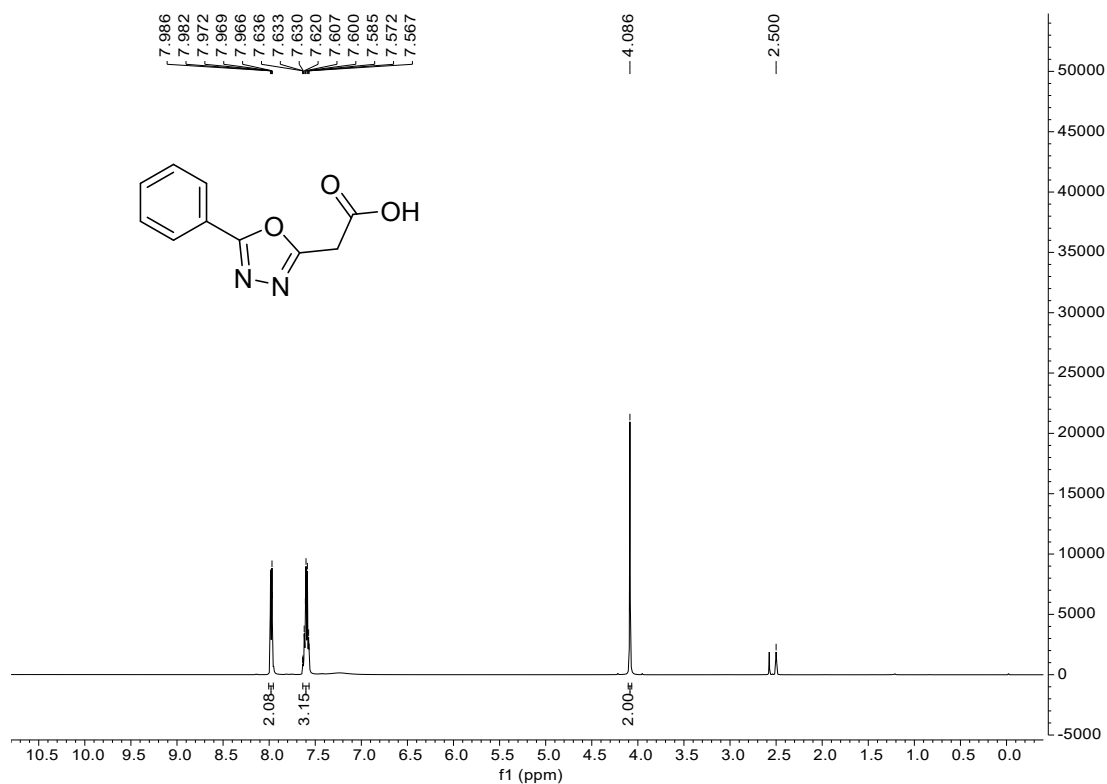

<sup>13</sup>C NMR (125 MHz, DMSO-*d*<sub>6</sub>) spectra of 7

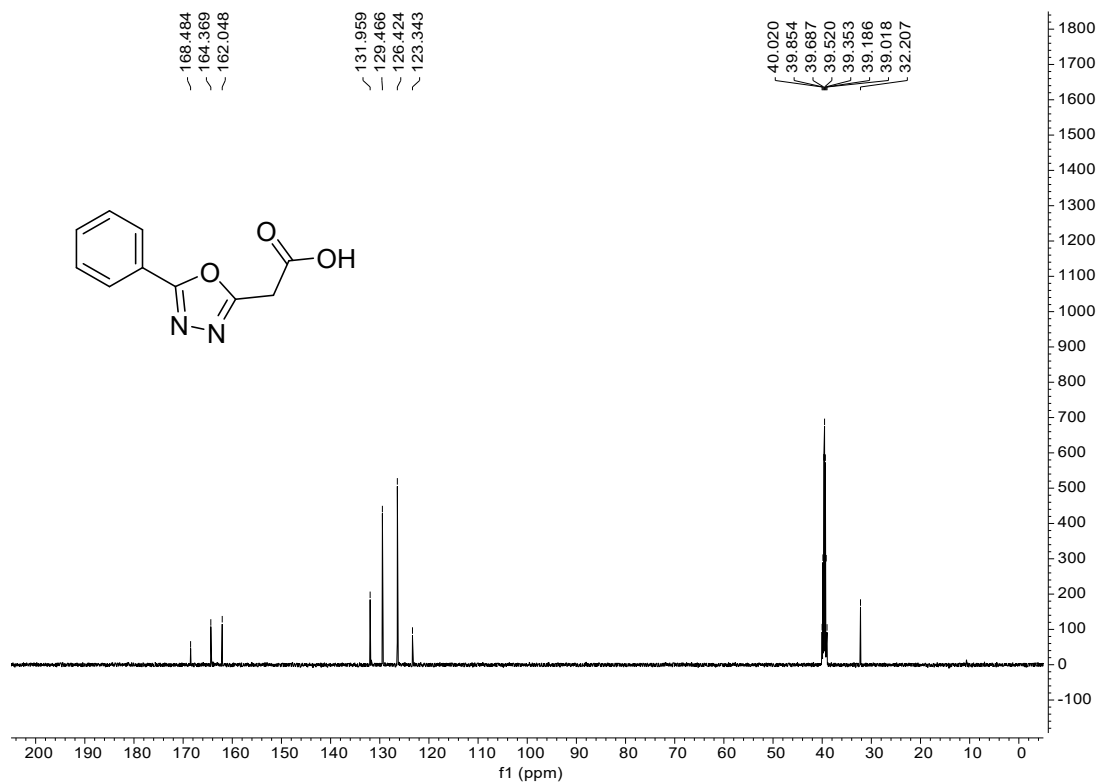

***N*-benzyl-2-(5-phenyl-1,3,4-thiadiazol-2-yl)acetamide (8)**

<sup>1</sup>H NMR (500 MHz, CDCl<sub>3</sub>) spectra of **8**

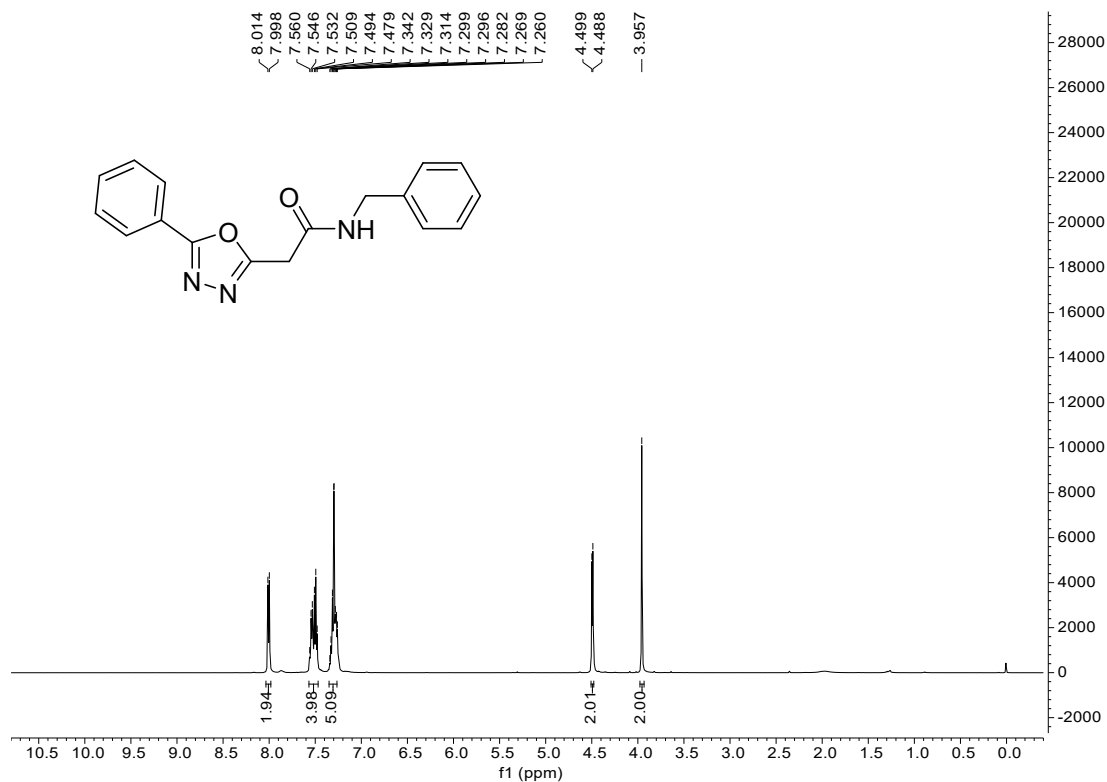

<sup>13</sup>C NMR (125 MHz, CDCl<sub>3</sub>) spectra of **8**

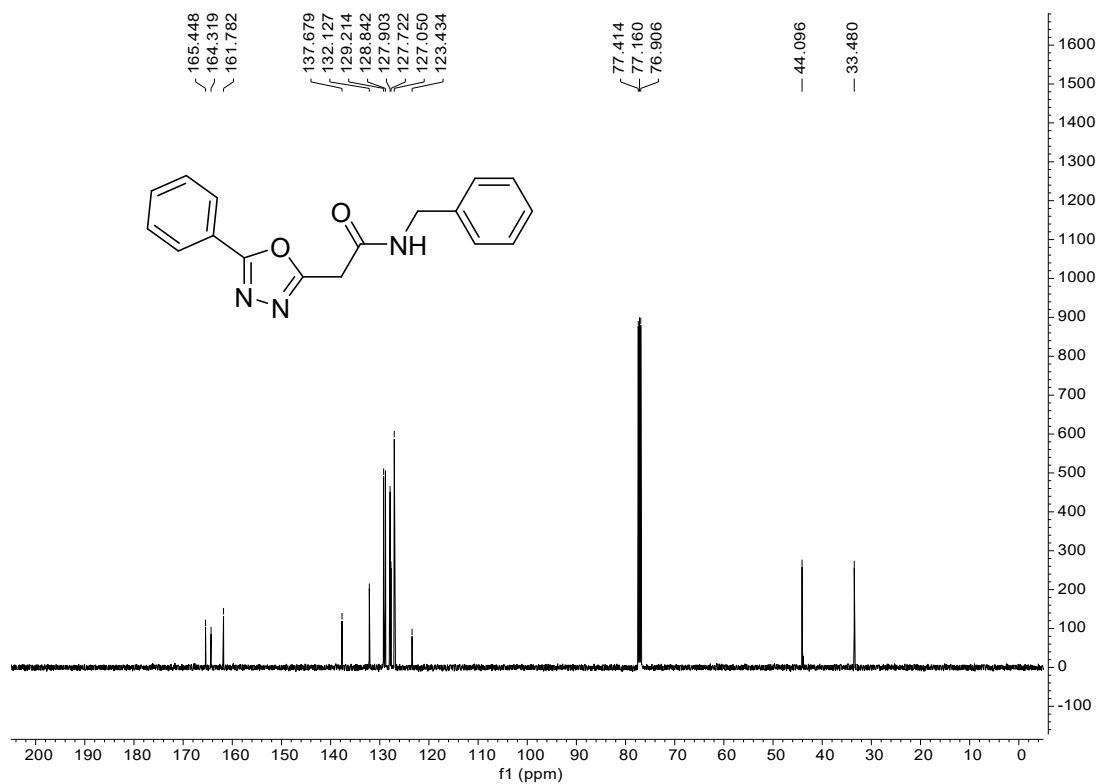

### 2-(5-phenyl-1,3,4-thiadiazol-2-yl)ethan-1-ol (9)

<sup>1</sup>H NMR (500 MHz, CDCl<sub>3</sub>) spectra of 9

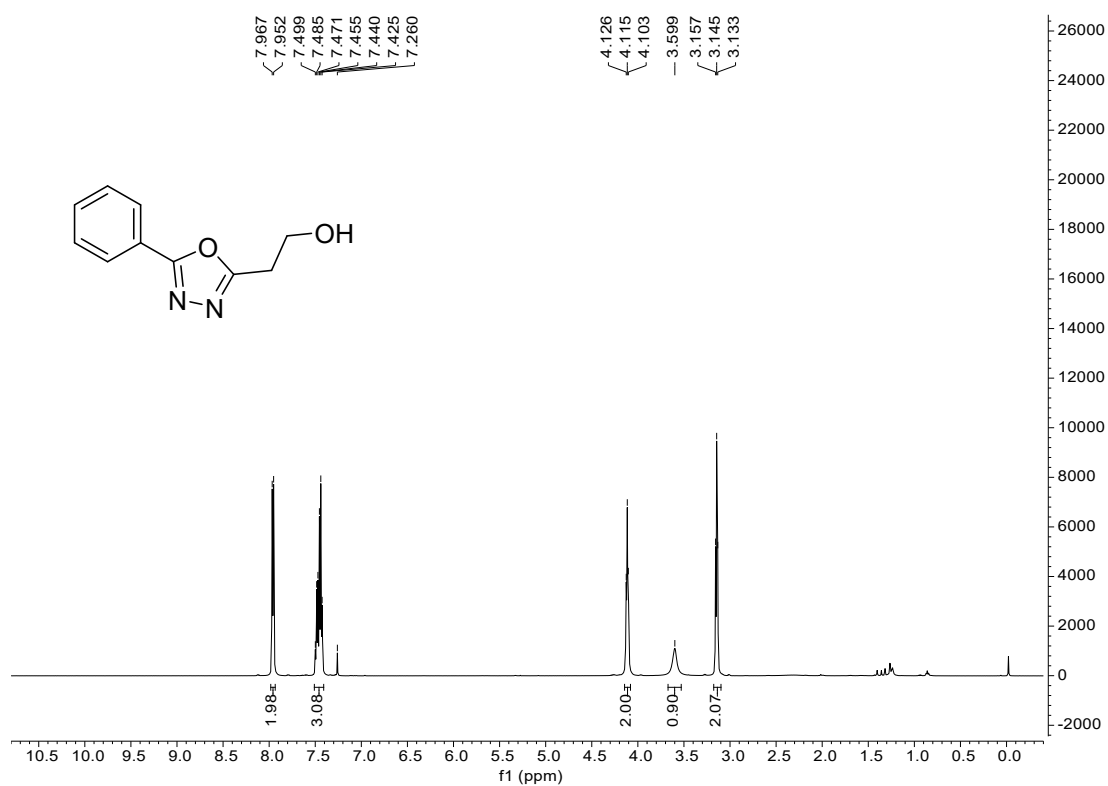

<sup>13</sup>C NMR (125 MHz, CDCl<sub>3</sub>) spectra of 9

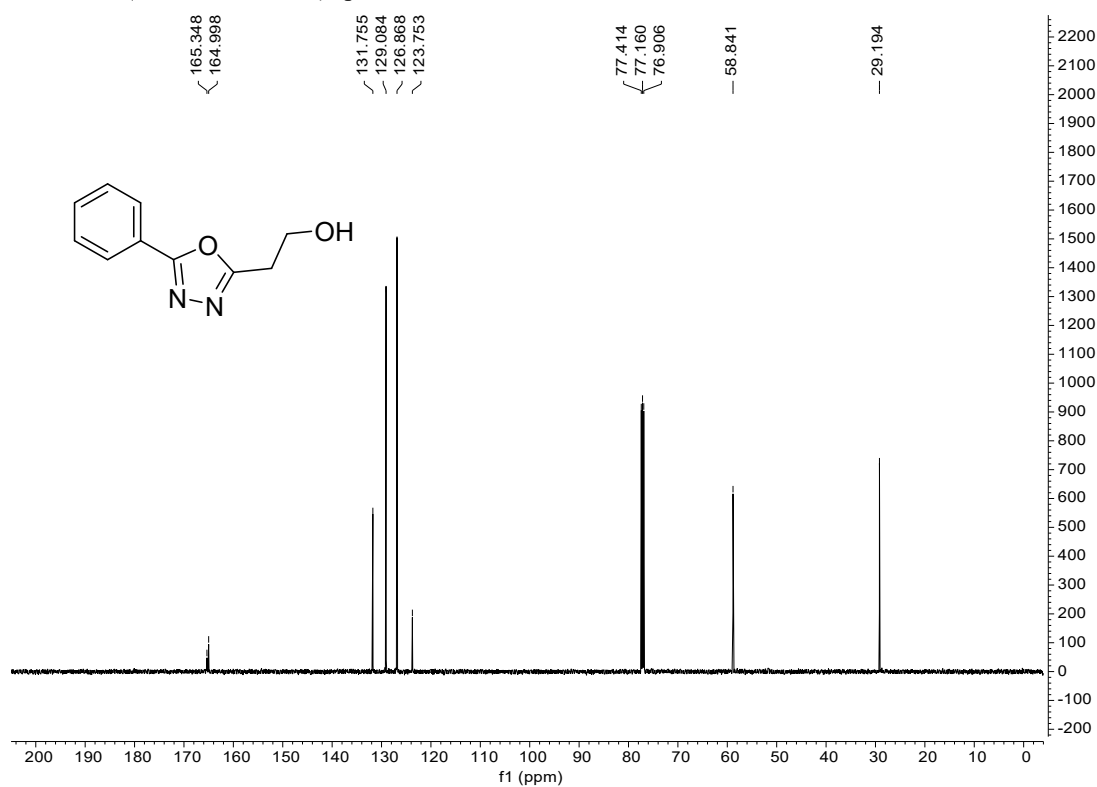

### Ethyl 2-(5-phenyl-1,3,4-thiadiazol-2-yl)butanoate (10)

<sup>1</sup>H NMR (500 MHz, CDCl<sub>3</sub>) spectra of 10

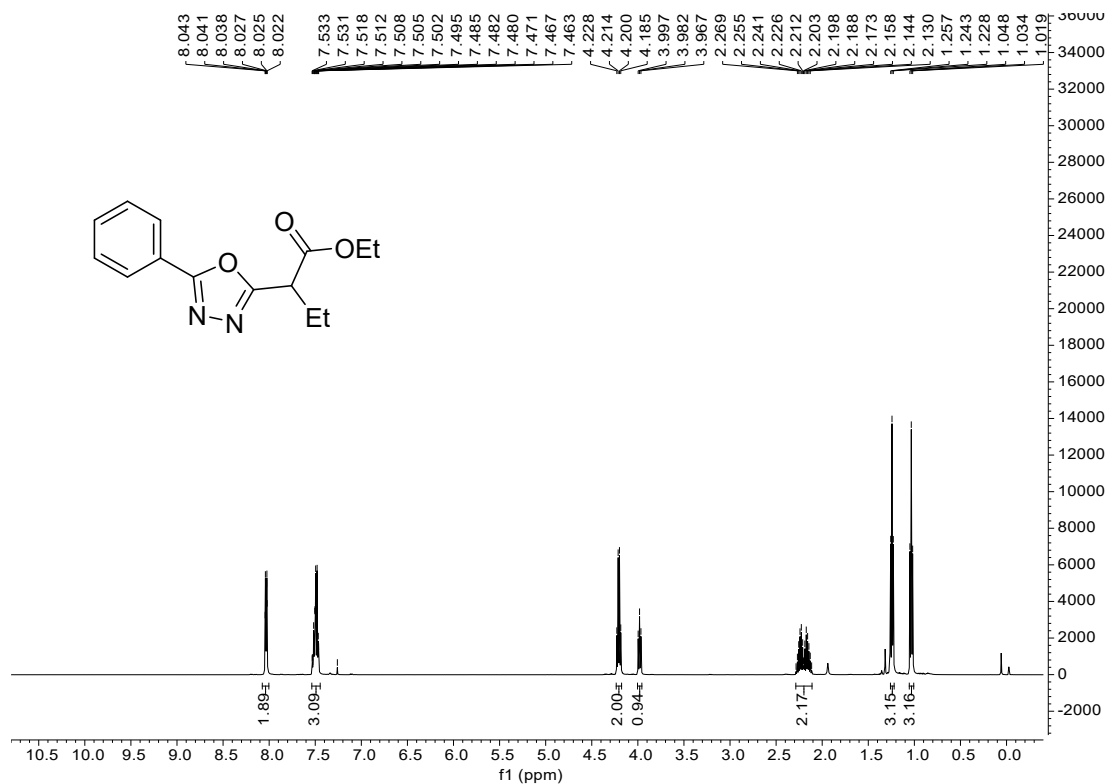

<sup>13</sup>C NMR (125 MHz, CDCl<sub>3</sub>) spectra of 10

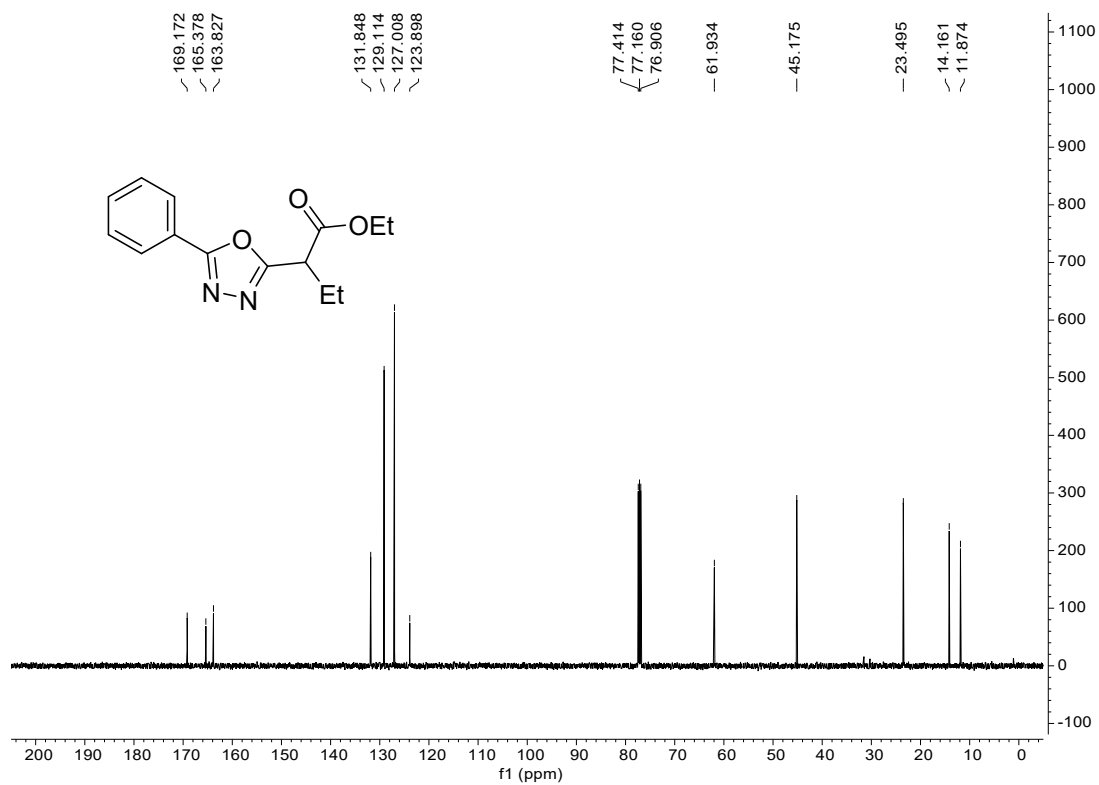

**Ethyl 4'-(5-(2-ethoxy-2-oxoethyl)-1,3,4-thiadiazol-2-yl)-[1,1'-biphenyl]-4-carboxylate (11)**

<sup>1</sup>H NMR (500 MHz, CDCl<sub>3</sub>) spectra of 11

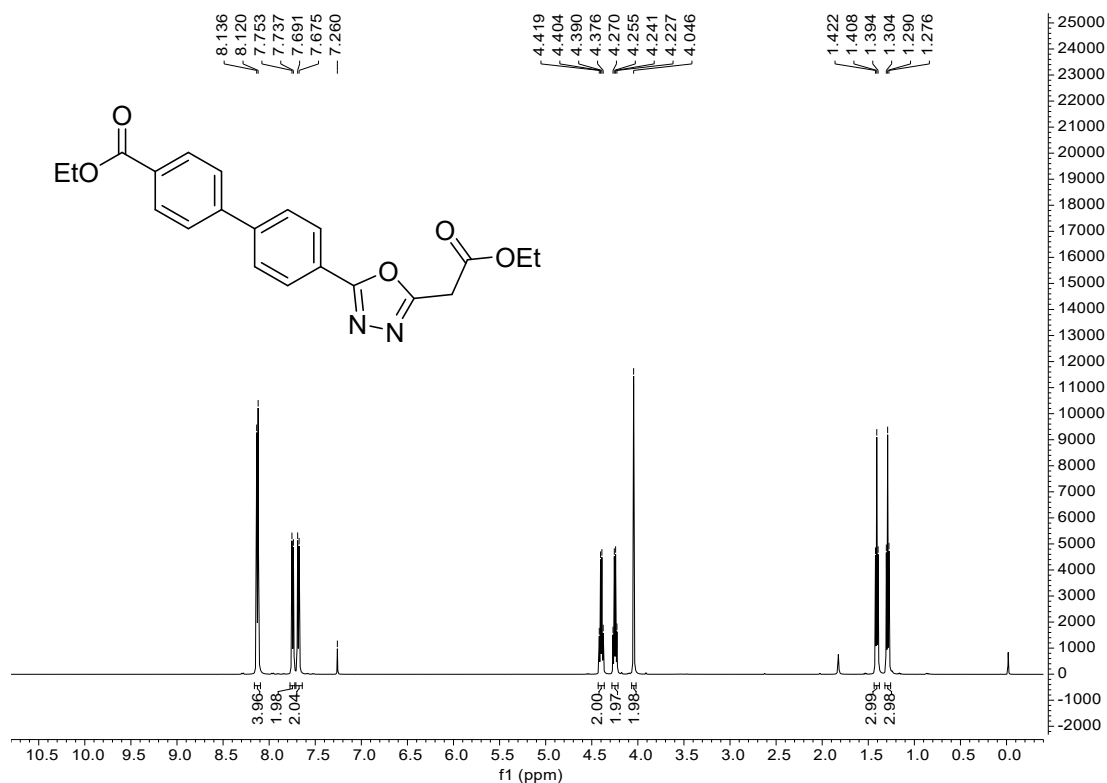

<sup>13</sup>C NMR (125 MHz, CDCl<sub>3</sub>) spectra of 11

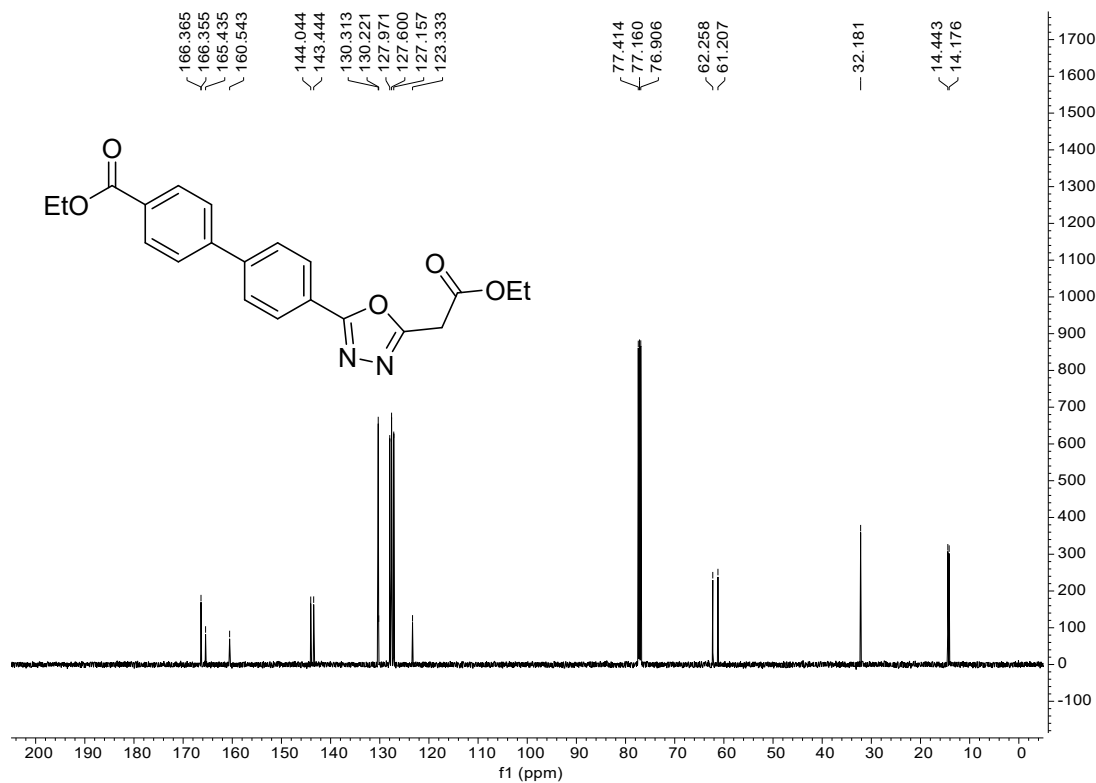



#### 4. X-ray structure of 2a (CCDC 2170479)

The structure of **2a** was further determined by single crystal X-ray analysis. (CCDC 2170479) contains the supplementary crystallographic data for this structure. These data can be obtained free of charge from The Cambridge Crystallographic Data Centre).

#### X-ray structure of product 2a (ellipsoid contour at 50% probability)

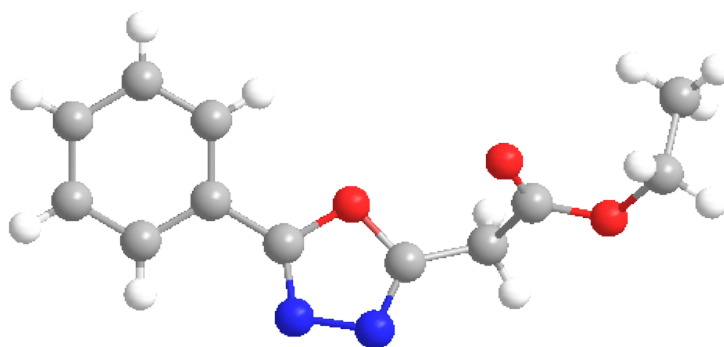

#### Experimental

Single crystals of **2a** ( $C_{12}H_{12}N_2O_3$ ) were grown by slow evaporation in ethyl acetate/ acetonitrile = 2/5 under air atmosphere. A suitable crystal was selected and mounted on a XtaLAB Synergy R, DW system, HyPix diffractometer. The crystal was kept at 100(2) K during data collection. Using Olex2, the structure was solved with the Shelxs structure solution program using Direct Methods.

#### Crystal structure determination of 2a

Crystal Data for  $C_{12}H_{12}N_2O_3$  ( $M=232.24$  g/mol): triclinic, space group P-1 (no. 2),  $a= 5.6320(5)\text{\AA}$ ,  $b= 8.3085(7)\text{\AA}$ ,  $c = 12.2276(16)\text{\AA}$ ,  $\alpha= 85.953(9)^\circ$ ,  $\beta= 80.093(9)^\circ$ ,  $\gamma= 75.863(7)^\circ$ ,  $V= 546.33(10)\text{\AA}^3$ ,  $Z= 2$ ,  $T= 100(2)\text{K}$ ,  $\mu(\text{MoK}\alpha)= 0.103\text{ mm}^{-1}$ ,  $D_{\text{calc}} = 1.412\text{ g/cm}^3$ .

Table 1. Crystal data and structure refinement for **2a**

|                        |                      |
|------------------------|----------------------|
| Empirical formula      | $C_{12}H_{12}N_2O_3$ |
| Formula weight         | 232.24               |
| Temperature/K          | 100(2)               |
| Crystal system         | triclinic            |
| Space group            | P-1                  |
| $a/\text{\AA}$         | 5.6320(5)            |
| $b/\text{\AA}$         | 8.3085(7)            |
| $c/\text{\AA}$         | 12.2276(16)          |
| $\alpha/^\circ$        | 85.953(9)            |
| $\beta/^\circ$         | 80.093(9)            |
| $\gamma/^\circ$        | 75.863(7)            |
| Volume/ $\text{\AA}^3$ | 546.33(10)           |

|                                                |                                                               |
|------------------------------------------------|---------------------------------------------------------------|
| Z                                              | 2                                                             |
| $\rho_{\text{calc}}/\text{cm}^3$               | 1.412                                                         |
| $\mu/\text{mm}^{-1}$                           | 0.103                                                         |
| F(000)                                         | 244.0                                                         |
| Crystal size/ $\text{mm}^3$                    | $0.25 \times 0.2 \times 0.2$                                  |
| Radiation                                      | MoK $\alpha$ ( $\lambda = 0.71073$ )                          |
| 2 $\Theta$ range for data collection/ $^\circ$ | 6.768 to 59.318                                               |
| Index ranges                                   | $-7 \leq h \leq 7, -11 \leq k \leq 11, -14 \leq l \leq 16$    |
| Reflections collected                          | 4184                                                          |
| Independent reflections                        | 2534 [ $R_{\text{int}} = 0.0441, R_{\text{sigma}} = 0.0812$ ] |
| Data/restraints/parameters                     | 2534/0/156                                                    |
| Goodness-of-fit on $F^2$                       | 1.047                                                         |
| Final R indexes [ $I \geq 2\sigma(I)$ ]        | $R_1 = 0.0544, wR_2 = 0.1159$                                 |
| Final R indexes [all data]                     | $R_1 = 0.0735, wR_2 = 0.1323$                                 |
| Largest diff. peak/hole / $e \text{ \AA}^{-3}$ | 0.26/-0.28                                                    |

### 5. X-ray structure of **4d** (CCDC 2178538)

The structure of **4d** was further determined by single crystal X-ray analysis. (CCDC 2178538) contains the supplementary crystallographic data for this structure. These data can be obtained free of charge from The Cambridge Crystallographic Data Centre).

#### X-ray structure of product **4d** (ellipsoid contour at 50% probability)

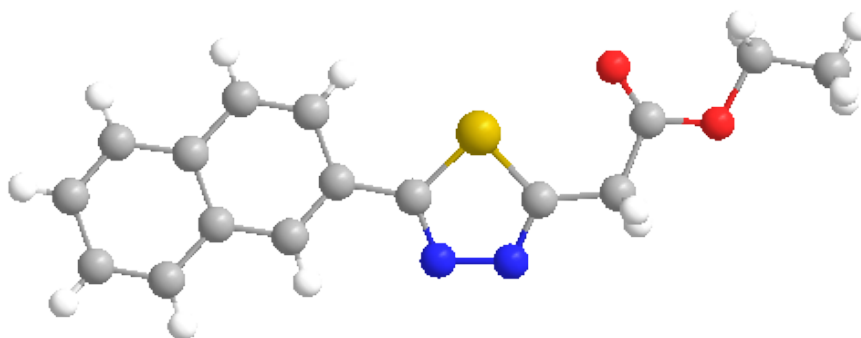

### Experimental

Single crystals of **4d** ( $\text{C}_{16}\text{H}_{14}\text{N}_2\text{O}_2\text{S}$ ) were grown by slow evaporation in ethyl acetate/ acetonitrile = 1/5 under air atmosphere. A suitable crystal was selected and mounted on a XtaLAB Synergy R, DW system, HyPix diffractometer. The crystal was kept at 300 K during data collection. Using Olex2, the structure was solved with the Shelxs structure solution program using Direct Methods.

#### Crystal structure determination of **4d**

Crystal Data for  $\text{C}_{16}\text{H}_{14}\text{N}_2\text{O}_2\text{S}$  ( $M = 298.35$  g/mol): space group P-1,  $a = 7.7462(4)\text{\AA}$ ,  $b = 9.2543(4)\text{\AA}$ ,

$c = 10.7494(5)\text{\AA}$ ,  $\alpha = 106.819(4)^\circ$ ,  $\beta = 100.376(4)^\circ$ ,  $\gamma = 93.807(4)^\circ$ ,  $V = 546.33(10)\text{\AA}^3$ ,  $Z = 2$ ,  $T = 300\text{ K}$ ,  
 $D_{\text{calc}} = 1.377\text{ g/cm}^3$ .

Table 2. Crystal data and structure refinement for **4d**

|                    |                                            |                                 |                 |
|--------------------|--------------------------------------------|---------------------------------|-----------------|
| Bond precision:    | C-C = 0.0024 Å                             | Wavelength=0.71073              |                 |
| Cell:              | a=7.7462(4)                                | b=9.2543(4)                     | c=10.7494(5)    |
|                    | alpha=106.819(4)                           | beta=100.376(4)                 | gamma=93.807(4) |
| Temperature:       | 300 K                                      |                                 |                 |
|                    | Calculated                                 | Reported                        |                 |
| Volume             | 719.78(6)                                  | 719.78(6)                       |                 |
| Space group        | P -1                                       | P -1                            |                 |
| Hall group         | -P 1                                       | -P 1                            |                 |
| Moiety formula     | C16 H14 N2 O2 S                            | C16 H14 N2 O2 S                 |                 |
| Sum formula        | C16 H14 N2 O2 S                            | C16 H14 N2 O2 S                 |                 |
| Mr                 | 298.35                                     | 298.35                          |                 |
| Dx,g cm-3          | 1.377                                      | 1.377                           |                 |
| Z                  | 2                                          | 2                               |                 |
| Mu (mm-1)          | 0.230                                      | 0.230                           |                 |
| F000               | 312.0                                      | 312.0                           |                 |
| F000'              | 312.37                                     |                                 |                 |
| h,k,lmax           | 11,13,15                                   | 10,13,15                        |                 |
| Nref               | 4560                                       | 3569                            |                 |
| Tmin,Tmax          |                                            | 0.651,1.000                     |                 |
| Tmin'              |                                            |                                 |                 |
| Correction method= | # Reported T Limits: Tmin=0.651 Tmax=1.000 |                                 |                 |
| AbsCorr =          | MULTI-SCAN                                 |                                 |                 |
| Data completeness= | 0.783                                      | Theta(max)= 30.912              |                 |
| R(reflections)=    | 0.0392( 2468)                              | wR2(reflections)= 0.1088( 3569) |                 |
| S =                | 1.039                                      | Npar= 191                       |                 |

## 6. X-ray structure of **6f** (CCDC 2178536)

The structure of **6f** was further determined by single crystal X-ray analysis. (CCDC 2178536) contains the supplementary crystallographic data for this structure. These data can be obtained free of charge from The Cambridge Crystallographic Data Centre).

### X-ray structure of product **6f** (ellipsoid contour at 50% probability)

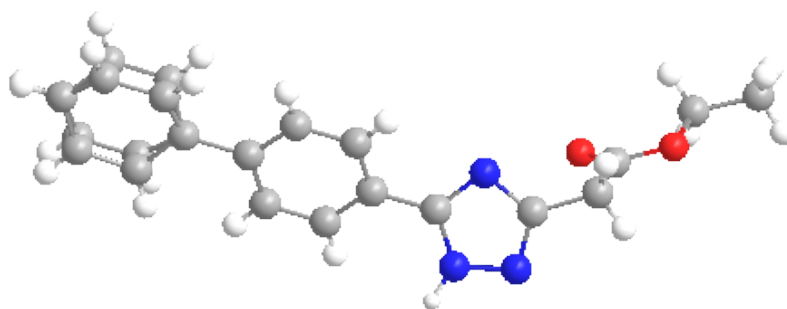

## Experimental

Single crystals of **6f** ( $C_{18}H_{17}N_3O_2$ ) were grown by slow evaporation in ethyl acetate/ acetonitrile = 1/1 under air atmosphere. A suitable crystal was selected and mounted on a XtaLAB Synergy R, DW system, HyPix diffractometer. The crystal was kept at 300 K during data collection. Using Olex2, the structure was solved with the Shelxs structure solution program using Direct Methods.

### Crystal structure determination of **6f**

Crystal Data for  $C_{18}H_{17}N_3O_2$  ( $M=307.34$  g/mol): space group P21/c,  $a= 8.4347(6)\text{\AA}$ ,  $b= 5.1670(3)\text{\AA}$ ,  $c = 35.992(2)\text{\AA}$ ,  $\alpha=90^\circ$ ,  $\beta= 92.243(5)^\circ$ ,  $\gamma=90^\circ$ ,  $V= 546.33(10)\text{\AA}^3$ ,  $Z= 4$ ,  $T= 300$  K,  $D_{calc} = 1.302$  g/cm<sup>3</sup>.

Table 3. Crystal data and structure refinement for **6f**

|                    |                                            |                |                    |
|--------------------|--------------------------------------------|----------------|--------------------|
| Bond precision:    | C-C = 0.0021 Å                             |                | Wavelength=0.71073 |
| Cell:              | a=8.4347(6)                                | b=5.1670(3)    | c=35.992(2)        |
|                    | alpha=90                                   | beta=92.243(5) | gamma=90           |
| Temperature:       | 300 K                                      |                |                    |
|                    | Calculated                                 | Reported       |                    |
| Volume             | 1567.41(17)                                | 1567.41(17)    |                    |
| Space group        | P 21/c                                     | P 1 21/c 1     |                    |
| Hall group         | -P 2ybc                                    | -P 2ybc        |                    |
| Moiety formula     | C18 H17 N3 O2                              | C18 H17 N3 O2  |                    |
| Sum formula        | C18 H17 N3 O2                              | C18 H17 N3 O2  |                    |
| Mr                 | 307.35                                     | 307.34         |                    |
| Dx,g cm-3          | 1.302                                      | 1.302          |                    |
| Z                  | 4                                          | 4              |                    |
| Mu (mm-1)          | 0.087                                      | 0.087          |                    |
| F000               | 648.0                                      | 648.0          |                    |
| F000'              | 648.27                                     |                |                    |
| h,k,lmax           | 12,7,51                                    | 11,6,45        |                    |
| Nref               | 4880                                       | 3975           |                    |
| Tmin,Tmax          | 0.992,0.996                                | 0.906,1.000    |                    |
| Tmin'              | 0.987                                      |                |                    |
| Correction method= | # Reported T Limits: Tmin=0.906 Tmax=1.000 |                |                    |

AbsCorr = MULTI-SCAN

Data completeness= 0.815

Theta(max)= 30.717

R(reflections)= 0.0495( 2694)

wR2(reflections)= 0.1339( 3975)

S = 1.020

Npar= 250

---
